# Supplementary material
Source: PubMed Central journal article supplement (PMC6677631)
Supplement: NIHMS1533618-supplement-2.pdf [file NIHMS1533618-supplement-2.pdf]

**An Exploratory Examination of Neonatal Cytokines and Chemokines  
as Predictors of Autism Risk: The Early Markers for Autism Study**

**SUPPLEMENTARY TABLES**

**Supplementary Table S1: Median Concentrations (Ln) and Range of Cytokines and Chemokines in Eluted Blood Spots.**

| Analyte     | Alternative Names                                        | Range          | GP     |      | DD     |      | ASD    |      | ASD-NoID |      | ASD-YesID |      | ASD-EO |      | ASD-Reg |      |
|-------------|----------------------------------------------------------|----------------|--------|------|--------|------|--------|------|----------|------|-----------|------|--------|------|---------|------|
|             |                                                          |                | Median | <MDL | Median | <MDL | Median | <MDL | Median   | <MDL | Median    | <MDL | Median | <MDL | Median  | <MDL |
| 6CKINE      | Secondary Lymphoid-Tissue Chemokine (CCL21)              | (3.14 - 5.37)  | 4.17   |      | 4.07   |      | 4.23   |      | 4.28     |      | 4.16      |      | 4.23   |      | 4.17    |      |
| BCA-1       | B Lymphocyte Chemoattractant (CXCL13)                    | (-1.99 - 1.3)  | 0.13   |      | 0.15   |      | 0.14   |      | 0.14     |      | 0.12      |      | 0.14   |      | 0.14    |      |
| CTACK       | Cutaneous T Cell-Attracting Chemokine (CCL27)            | (1.81 - 4.21)  | 3.1    |      | 3.12   |      | 3.12   |      | 3.16     |      | 3.05      |      | 3.08   |      | 3.19    |      |
| ENA-78      | Epithelial-Derived Neutrophil-Activating Peptide (CXCL5) | (-0.99 - 5.87) | 3.98   | 17%  | 3.93   | 21%  | 3.97   | 16%  | 3.99     | 14%  | 3.92      | 19%  | 3.98   | 14%  | 3.93    | 17%  |
| Eotaxin-1   | Eosinophil Chemotactic Protein (CCL11)                   | (-1.77 - 1.58) | 0.83   |      | 0.79   |      | 0.86   |      | 0.85     |      | 0.88      |      | 0.85   |      | 0.86    |      |
| Eotaxin-2   | Eosinophil Chemotactic Protein 2 (CCL24)                 | (-5.05 - 2.87) | 0.74   | 19%  | 0.77   | 24%  | 0.81   | 20%  | 0.79     | 18%  | 0.85      | 21%  | 0.82   | 19%  | 0.83    | 21%  |
| Eotaxin-3   | Macrophage Inflammatory Protein 4-alpha (CCL26)          | (-1.43 - 2.59) | 1.65   |      | 1.62   |      | 1.65   |      | 1.67     |      | 1.6       |      | 1.65   |      | 1.69    |      |
| Fractalkine | Fractalkine (CX3CL1)                                     | (-0.71 - 3.36) | 2.57   |      | 2.6    |      | 2.59   |      | 2.59     |      | 2.57      |      | 2.59   |      | 2.59    |      |
| GCP-2       | Granulocyte Chemotactic Protein 2 (CXCL6)                | (0.6 - 3.45)   | 2.13   |      | 2.13   |      | 2.14   |      | 2.18     |      | 2.11      |      | 2.13   |      | 2.15    |      |
| GM-CSF      | Granulocyte-Macrophage Colony Stimulating Factor         | (-6.35 - 0.8)  | -3.47  | 60%  | -3.48  | 59%  | -3.39  | 59%  | -3.95    | 64%  | -2.9      | 55%  | -3.44  | 56%  | -3.28   | 57%  |
| GRO-A       | GRO1 Oncogene (CXCL1)                                    | (2.79 - 5.14)  | 3.74   |      | 3.75   |      | 3.77   |      | 3.79     |      | 3.75      |      | 3.79   |      | 3.73    |      |
| GRO-B       | Macrophage Inflammatory Protein 2-alpha (CXCL2)          | (2.37 - 5.24)  | 3.93   |      | 3.93   |      | 3.97   |      | 3.97     |      | 3.96      |      | 3.97   |      | 3.94    |      |

| Analyte       | Alternative Names                                          | Range           | GP     |      | DD     |      | ASD    |      | ASD-NoID |      | ASD-YesID |      | ASD-EO |      | ASD-Reg |      |
|---------------|------------------------------------------------------------|-----------------|--------|------|--------|------|--------|------|----------|------|-----------|------|--------|------|---------|------|
|               |                                                            |                 | Median | <MDL | Median | <MDL | Median | <MDL | Median   | <MDL | Median    | <MDL | Median | <MDL | Median  | <MDL |
| I-309         | Small Inducible Cytokine A1 (CCL1)                         | (-0.03 - 2.24)  | 1.7    |      | 1.71   |      | 1.72   |      | 1.74     |      | 1.69      |      | 1.72   |      | 1.72    |      |
| IFN- $\gamma$ | Interferon-gamma                                           | (-0.32 - 3.98)  | 2.97   |      | 2.95   |      | 3      |      | 3.02     |      | 2.97      |      | 2.99   |      | 3       |      |
| IL-1B         | Interleukin-1 beta                                         | (-3.72 - -0.04) | -0.99  |      | -0.96  |      | -0.95  |      | -0.99    |      | -0.95     |      | -0.96  |      | -0.94   |      |
| IL-2          | Interleukin-2                                              | (-2.6 - 1.19)   | 0.24   |      | 0.26   |      | 0.24   |      | 0.24     |      | 0.23      |      | 0.23   |      | 0.27    |      |
| IL-4          | Interleukin-4                                              | (-5.11 - 1.22)  | 0.38   | 1%   | 0.37   |      | 0.41   |      | 0.41     |      | 0.4       |      | 0.4    |      | 0.41    |      |
| IL-6          | Interleukin-6                                              | (-3.74 - 3.31)  | 0.22   |      | 0.22   |      | 0.24   |      | 0.23     |      | 0.24      |      | 0.23   |      | 0.26    |      |
| IL-8          | Interleukin-8 (CXCL8)                                      | (0.33 - 5.07)   | 1.63   |      | 1.68   |      | 1.7    |      | 1.67     |      | 1.74      |      | 1.74   |      | 1.62    |      |
| IL-10         | Interleukin-10                                             | (-1.1 - 1.97)   | 1.02   |      | 1.02   |      | 1.05   |      | 1.07     |      | 1.04      |      | 1.04   |      | 1.07    |      |
| IL-16         | Interleukin 16                                             | (3.75 - 7.21)   | 6.18   |      | 6.07   |      | 6.2    |      | 6.2      |      | 6.19      |      | 6.16   |      | 6.21    |      |
| IP-10         | Interferon-gamma Induced Protein 10 (CXCL10)               | (-0.58 - 3.08)  | 1.46   |      | 1.51   |      | 1.47   |      | 1.47     |      | 1.46      |      | 1.47   |      | 1.45    |      |
| I-TAC         | Interferon-Inducible T-Cell alpha Chemoattractant (CXCL11) | (-0.85 - 2.62)  | 1.31   |      | 1.31   |      | 1.23   |      | 1.26     |      | 1.16      |      | 1.22   |      | 1.3     |      |
| MCP-1         | Monocyte Chemotactic Protein 1 (CCL2)                      | (-0.19 - 4.16)  | 1.98   |      | 1.99   |      | 1.95   |      | 1.95     |      | 1.95      |      | 1.95   |      | 1.94    |      |
| MCP-2         | Monocyte Chemotactic Protein 2 (CCL8)                      | (-2.95 - 1.41)  | -0.13  |      | -0.13  |      | -0.13  |      | -0.12    |      | -0.13     |      | -0.13  |      | -0.12   |      |
| MCP-3         | Monocyte Chemotactic Protein 3 (CCL7)                      | (-0.37 - 2.99)  | 2.09   |      | 2.09   |      | 2.11   |      | 2.12     |      | 2.09      |      | 2.08   |      | 2.15    |      |
| MCP-4         | Monocyte Chemotactic Protein 4 (CCL13)                     | (-6.55 - 1.5)   | 0.17   |      | 0.19   |      | 0.14   |      | 0.19     |      | 0.07      |      | 0.13   |      | 0.16    |      |
| MDC           | Macrophage-Derived Chemokine (CCL22)                       | (1.5 - 4.35)    | 3.01   |      | 2.97   |      | 3.06   |      | 3.08     |      | 3.04      |      | 3.04   |      | 3.09    |      |
| MIF           | Macrophage Migration Inhibitory Factor                     | (6.72 -14.51)   | 11.22  |      | 11.19  |      | 11.28  |      | 11.29    |      | 11.3      |      | 11.29  |      | 11.24   |      |

| Analyte  | Alternative Names                                     | Range           | GP     |      | DD     |      | ASD    |      | ASD-NoID |      | ASD-YesID |      | ASD-EO |      | ASD-Reg |      |
|----------|-------------------------------------------------------|-----------------|--------|------|--------|------|--------|------|----------|------|-----------|------|--------|------|---------|------|
|          |                                                       |                 | Median | <MDL | Median | <MDL | Median | <MDL | Median   | <MDL | Median    | <MDL | Median | <MDL | Median  | <MDL |
| MIG      | Monokine Induced by Gamma Interferon (CXCL9)          | (1 - 3.81)      | 2.59   | 5%   | 2.64   | 6%   | 2.64   | 6%   | 2.66     | 4%   | 2.6       | 7%   | 2.6    | 5%   | 2.69    | 5%   |
| MIP-1A   | Macrophage Inflammatory Protein 1-alpha (CCL3)        | (-2.15 - 2.31)  | -0.34  |      | -0.4   |      | -0.31  |      | -0.32    |      | -0.31     |      | -0.32  |      | -0.31   |      |
| MIP-1D   | Macrophage Inflammatory Protein 5 (CCL15)             | (3.04 - 7.45)   | 5.07   |      | 5.15   |      | 5.1    |      | 5.12     |      | 5.07      |      | 5.1    |      | 5.08    |      |
| MIP-3A   | Macrophage Inflammatory Protein 3-alpha (CCL20)       | (-2.34 - 1.16)  | 0.02   |      | 0.02   |      | 0.03   |      | 0.04     |      | 0.01      |      | 0.03   |      | 0.04    |      |
| MIP-3B   | Macrophage Inflammatory Protein 3-beta (CCL19)        | (1.43 - 5.16)   | 3.61   |      | 3.67   |      | 3.67   |      | 3.66     |      | 3.63      |      | 3.61   |      | 3.77    |      |
| MPIF-1   | Myeloid Progenitor Inhibitory Factor 1 (CCL23)        | (-1.06 - 3.91)  | 2.18   | 0%   | 2.04   |      | 2.19   |      | 2.18     |      | 2.2       |      | 2.19   |      | 2.21    |      |
| SCYB16   | Small-Inducible Cytokine B16 (CXCL16)                 | (0.71 - 3.79)   | 2.16   |      | 2.23   |      | 2.2    |      | 2.21     |      | 2.2       |      | 2.21   |      | 2.2     |      |
| SDF-1A-B | Stromal Cell-Derived Factor 1 alpha and beta (CXCL12) | (1.66 - 4.04)   | 3.56   |      | 3.54   |      | 3.56   |      | 3.58     |      | 3.55      |      | 3.56   |      | 3.57    |      |
| TARC     | Thymus and Activation Regulated Chemokine (CCL17)     | (1.66 - 5.23)   | 3.32   |      | 3.39   |      | 3.37   |      | 3.35     |      | 3.35      |      | 3.34   |      | 3.46    |      |
| TECK     | Thymus-Expressed Chemokine (CCL25)                    | (2.84 - 5.59)   | 4.98   |      | 4.97   |      | 4.98   |      | 5.01     |      | 4.95      |      | 4.98   |      | 4.97    |      |
| TNF-a    | Tumor Necrosis Factor alpha                           | (-1.17 - 2.08)  | 1.17   |      | 1.18   |      | 1.18   |      | 1.19     |      | 1.15      |      | 1.18   |      | 1.19    |      |
| IL-12p70 | Interleukin-12 Active Heterodimer                     | (-5.97 - -0.52) | -1.37  |      | -1.4   |      | -1.33  |      | -1.32    |      | -1.34     |      | -1.33  |      | -1.33   |      |

| Analyte | Alternative Names | Range         | GP     |      | DD     |      | ASD    |      | ASD-NoID |      | ASD-YesID |      | ASD-EO |      | ASD-Reg |      |
|---------|-------------------|---------------|--------|------|--------|------|--------|------|----------|------|-----------|------|--------|------|---------|------|
|         |                   |               | Median | <MDL | Median | <MDL | Median | <MDL | Median   | <MDL | Median    | <MDL | Median | <MDL | Median  | <MDL |
| IL-13   | Interleukin-13    | (-5.1- -0.72) | -1.91  | 1%   | -1.94  | 1%   | -1.94  | 1%   | -1.93    | 0%   | -1.97     | 1%   | -1.94  | 0.4% | -1.96   | 1%   |

**Results are Reported as the Ln of pg/mg total protein.** <MDL, Below the Minimum Level of Detection.

**Supplementary Table S2. Crude and Adjusted Odds Ratios and 95% Confidence Intervals Comparing Neonatal Bloodspot Immune Marker Levels in the EMA Study**

|                      |             |        | <i>Crude</i>          |                | <i>Adjusted</i>       |                |
|----------------------|-------------|--------|-----------------------|----------------|-----------------------|----------------|
| <i>Immune Marker</i> |             |        | <i>OR (95% CI)</i>    | <i>P-Value</i> | <i>OR (95% CI)</i>    | <i>P-Value</i> |
| ASD                  | vs GP       | 6CKINE | 1.287 (0.89 - 1.861)  | 0.18           | 1.335 (0.859 - 2.074) | 0.199          |
| ASD-NoID             | vs GP       | 6CKINE | 1.51 (0.958 - 2.381)  | 0.076          | 1.556 (0.895 - 2.707) | 0.117          |
| ASD-YesID            | vs GP       | 6CKINE | 1.016 (0.632 - 1.632) | 0.948          | 1.15 (0.654 - 2.02)   | 0.628          |
| ASD-EO               | vs GP       | 6CKINE | 1.398 (0.935 - 2.09)  | 0.102          | 1.501 (0.925 - 2.436) | 0.1            |
| ASD-Reg              | vs GP       | 6CKINE | 0.897 (0.497 - 1.618) | 0.718          | 0.769 (0.376 - 1.57)  | 0.47           |
| DD                   | vs GP       | 6CKINE | 0.628 (0.378 - 1.044) | 0.073          | 0.754 (0.41 - 1.387)  | 0.364          |
| ASD                  | vs DD       | 6CKINE | 2.048 (1.23 - 3.408)  | <b>0.006</b>   | 1.77 (0.951 - 3.297)  | 0.072          |
| ASD-NoID             | vs DD       | 6CKINE | 2.403 (1.352 - 4.273) | <b>0.003</b>   | 2.065 (1.018 - 4.188) | <b>0.045</b>   |
| ASD-YesID            | vs DD       | 6CKINE | 1.616 (0.897 - 2.914) | 0.11           | 1.525 (0.748 - 3.109) | 0.246          |
| ASD-EO               | vs DD       | 6CKINE | 2.225 (1.304 - 3.795) | <b>0.003</b>   | 1.992 (1.034 - 3.835) | <b>0.039</b>   |
| ASD-Reg              | vs DD       | 6CKINE | 1.427 (0.719 - 2.833) | 0.309          | 1.02 (0.443 - 2.346)  | 0.964          |
| ASD-YesID            | vs ASD-NoID | 6CKINE | 0.673 (0.39 - 1.159)  | 0.153          | 0.739 (0.382 - 1.427) | 0.367          |
| ASD-Reg              | vs ASD-EO   | 6CKINE | 0.641 (0.348 - 1.183) | 0.155          | 0.512 (0.243 - 1.079) | 0.078          |
| ASD                  | vs GP       | BCA-1  | 1.305 (0.795 - 2.14)  | 0.292          | 1.459 (0.813 - 2.617) | 0.205          |
| ASD-NoID             | vs GP       | BCA-1  | 1.456 (0.787 - 2.694) | 0.231          | 1.695 (0.813 - 3.535) | 0.159          |
| ASD-YesID            | vs GP       | BCA-1  | 1.06 (0.564 - 1.993)  | 0.857          | 1.207 (0.569 - 2.562) | 0.624          |
| ASD-EO               | vs GP       | BCA-1  | 1.216 (0.709 - 2.086) | 0.477          | 1.244 (0.657 - 2.357) | 0.503          |
| ASD-Reg              | vs GP       | BCA-1  | 1.928 (0.871 - 4.264) | 0.105          | 2.869 (1.099 - 7.494) | <b>0.031</b>   |
| DD                   | vs GP       | BCA-1  | 0.926 (0.477 - 1.799) | 0.82           | 1.118 (0.518 - 2.415) | 0.776          |
| ASD                  | vs DD       | BCA-1  | 1.409 (0.722 - 2.749) | 0.315          | 1.305 (0.588 - 2.895) | 0.513          |
| ASD-NoID             | vs DD       | BCA-1  | 1.573 (0.734 - 3.369) | 0.244          | 1.516 (0.607 - 3.787) | 0.373          |
| ASD-YesID            | vs DD       | BCA-1  | 1.145 (0.527 - 2.484) | 0.733          | 1.079 (0.429 - 2.715) | 0.871          |

|                      |             |           | <i>Crude</i>          |                | <i>Adjusted</i>       |                |
|----------------------|-------------|-----------|-----------------------|----------------|-----------------------|----------------|
| <i>Immune Marker</i> |             |           | <i>OR (95% CI)</i>    | <i>P-Value</i> | <i>OR (95% CI)</i>    | <i>P-Value</i> |
| ASD-EO               | vs DD       | BCA-1     | 1.314 (0.651 - 2.65)  | 0.446          | 1.113 (0.48 - 2.577)  | 0.803          |
| ASD-Reg              | vs DD       | BCA-1     | 2.082 (0.836 - 5.185) | 0.115          | 2.566 (0.854 - 7.705) | 0.093          |
| ASD-YesID            | vs ASD-NoID | BCA-1     | 0.728 (0.35 - 1.515)  | 0.395          | 0.712 (0.294 - 1.725) | 0.452          |
| ASD-Reg              | vs ASD-EO   | BCA-1     | 1.585 (0.695 - 3.615) | 0.274          | 2.306 (0.845 - 6.293) | 0.103          |
| ASD                  | vs GP       | CTACK     | 1.057 (0.701 - 1.593) | 0.793          | 1.146 (0.71 - 1.848)  | 0.577          |
| ASD-NoID             | vs GP       | CTACK     | 1.663 (1.001 - 2.764) | 0.05           | 1.635 (0.903 - 2.963) | 0.105          |
| ASD-YesID            | vs GP       | CTACK     | 0.613 (0.362 - 1.04)  | 0.07           | 0.784 (0.424 - 1.451) | 0.439          |
| ASD-EO               | vs GP       | CTACK     | 0.953 (0.609 - 1.491) | 0.833          | 1.057 (0.627 - 1.784) | 0.834          |
| ASD-Reg              | vs GP       | CTACK     | 1.179 (0.614 - 2.263) | 0.621          | 1.268 (0.584 - 2.755) | 0.549          |
| DD                   | vs GP       | CTACK     | 0.885 (0.508 - 1.543) | 0.667          | 1.076 (0.564 - 2.054) | 0.824          |
| ASD                  | vs DD       | CTACK     | 1.193 (0.683 - 2.084) | 0.534          | 1.065 (0.551 - 2.057) | 0.852          |
| ASD-NoID             | vs DD       | CTACK     | 1.879 (0.998 - 3.539) | 0.051          | 1.52 (0.718 - 3.216)  | 0.274          |
| ASD-YesID            | vs DD       | CTACK     | 0.693 (0.362 - 1.325) | 0.267          | 0.729 (0.34 - 1.559)  | 0.415          |
| ASD-EO               | vs DD       | CTACK     | 1.076 (0.599 - 1.933) | 0.805          | 0.983 (0.491 - 1.966) | 0.96           |
| ASD-Reg              | vs DD       | CTACK     | 1.332 (0.627 - 2.829) | 0.456          | 1.178 (0.481 - 2.884) | 0.72           |
| ASD-YesID            | vs ASD-NoID | CTACK     | 0.369 (0.2 - 0.679)   | <b>0.001</b>   | 0.479 (0.235 - 0.978) | <b>0.043</b>   |
| ASD-Reg              | vs ASD-EO   | CTACK     | 1.237 (0.628 - 2.436) | 0.538          | 1.199 (0.535 - 2.688) | 0.659          |
| ASD                  | vs GP       | ENA-78 Q4 | 1.144 (0.757 - 1.73)  | 0.523          | 1.255 (0.817 - 1.928) | 0.3            |
|                      |             | ENA-78 Q3 | 1.144 (0.755 - 1.733) | 0.526          | 1.262 (0.82 - 1.944)  | 0.29           |
|                      |             | ENA-78 Q2 | 1.23 (0.812 - 1.865)  | 0.329          | 1.321 (0.86 - 2.028)  | 0.203          |
|                      |             | ENA-78 Q1 | Reference             |                | Reference             |                |
| ASD-NoID             | vs GP       | ENA-78 Q4 | 1.377 (0.811 - 2.338) | 0.237          | 1.565 (0.902 - 2.713) | 0.111          |
|                      |             | ENA-78 Q3 | 1.376 (0.809 - 2.342) | 0.239          | 1.543 (0.887 - 2.684) | 0.125          |
|                      |             | ENA-78 Q2 | 1.525 (0.899 - 2.589) | 0.118          | 1.63 (0.945 - 2.811)  | 0.079          |

|                      |           | <i>Crude</i>          |                | <i>Adjusted</i>       |                |
|----------------------|-----------|-----------------------|----------------|-----------------------|----------------|
| <i>Immune Marker</i> |           | <i>OR (95% CI)</i>    | <i>P-Value</i> | <i>OR (95% CI)</i>    | <i>P-Value</i> |
| ASD-YesID vs GP      | ENA-78 Q1 | Reference             |                | Reference             |                |
|                      | ENA-78 Q4 | 0.991 (0.59 - 1.666)  | 0.973          | 1.032 (0.602 - 1.767) | 0.91           |
|                      | ENA-78 Q3 | 0.894 (0.525 - 1.521) | 0.679          | 0.97 (0.56 - 1.678)   | 0.912          |
|                      | ENA-78 Q2 | 1.055 (0.626 - 1.778) | 0.84           | 1.147 (0.671 - 1.96)  | 0.616          |
| ASD-EO vs GP         | ENA-78 Q1 | Reference             |                | Reference             |                |
|                      | ENA-78 Q4 | 1.265 (0.806 - 1.987) | 0.307          | 1.438 (0.899 - 2.301) | 0.13           |
|                      | ENA-78 Q3 | 1.138 (0.719 - 1.803) | 0.58           | 1.304 (0.808 - 2.105) | 0.277          |
|                      | ENA-78 Q2 | 1.276 (0.808 - 2.015) | 0.296          | 1.418 (0.884 - 2.274) | 0.147          |
| ASD-Reg vs GP        | ENA-78 Q1 | Reference             |                | Reference             |                |
|                      | ENA-78 Q4 | 0.899 (0.454 - 1.779) | 0.76           | 0.9 (0.444 - 1.823)   | 0.769          |
|                      | ENA-78 Q3 | 1.193 (0.623 - 2.285) | 0.595          | 1.182 (0.602 - 2.321) | 0.628          |
|                      | ENA-78 Q2 | 1.244 (0.649 - 2.386) | 0.511          | 1.191 (0.611 - 2.324) | 0.608          |
| DD vs GP             | ENA-78 Q1 | Reference             |                | Reference             |                |
|                      | ENA-78 Q4 | 0.826 (0.478 - 1.427) | 0.493          | 0.78 (0.433 - 1.404)  | 0.407          |
|                      | ENA-78 Q3 | 0.893 (0.519 - 1.534) | 0.681          | 0.904 (0.503 - 1.626) | 0.737          |
|                      | ENA-78 Q2 | 0.854 (0.491 - 1.482) | 0.574          | 0.887 (0.491 - 1.6)   | 0.69           |
| ASD vs DD            | ENA-78 Q1 | Reference             |                | Reference             |                |
|                      | ENA-78 Q4 | 1.385 (0.797 - 2.408) | 0.248          | 1.61 (0.88 - 2.946)   | 0.123          |
|                      | ENA-78 Q3 | 1.281 (0.741 - 2.217) | 0.375          | 1.396 (0.764 - 2.55)  | 0.278          |
|                      | ENA-78 Q2 | 1.442 (0.827 - 2.513) | 0.197          | 1.49 (0.814 - 2.724)  | 0.196          |
| ASD-NoID vs DD       | ENA-78 Q1 | Reference             |                | Reference             |                |
|                      | ENA-78 Q4 | 1.666 (0.875 - 3.174) | 0.12           | 2.007 (1 - 4.028)     | 0.05           |
|                      | ENA-78 Q3 | 1.542 (0.812 - 2.926) | 0.186          | 1.706 (0.851 - 3.421) | 0.132          |
|                      | ENA-78 Q2 | 1.787 (0.938 - 3.405) | 0.078          | 1.838 (0.92 - 3.673)  | 0.085          |
| ASD-YesID vs DD      | ENA-78 Q1 | Reference             |                | Reference             |                |
|                      | ENA-78 Q4 | 1.2 (0.635 - 2.267)   | 0.575          | 1.323 (0.668 - 2.622) | 0.422          |
|                      | ENA-78 Q3 | 1.001 (0.528 - 1.9)   | 0.997          | 1.072 (0.538 - 2.135) | 0.843          |



|           |             | <b>Crude</b>         |                       | <b>Adjusted</b>    |                       |       |
|-----------|-------------|----------------------|-----------------------|--------------------|-----------------------|-------|
|           |             | <b>OR (95% CI)</b>   | <b>P-Value</b>        | <b>OR (95% CI)</b> | <b>P-Value</b>        |       |
|           |             | <b>Immune Marker</b> |                       |                    |                       |       |
| ASD-EO    | vs DD       | ENA-78 Q2            | 1.236 (0.653 - 2.342) | 0.515              | 1.293 (0.654 - 2.558) | 0.46  |
|           |             | ENA-78 Q1            | Reference             |                    | Reference             |       |
|           |             | ENA-78 Q4            | 1.532 (0.856 - 2.74)  | 0.151              | 1.845 (0.977 - 3.484) | 0.059 |
|           |             | ENA-78 Q3            | 1.275 (0.712 - 2.283) | 0.413              | 1.442 (0.761 - 2.732) | 0.262 |
|           |             | ENA-78 Q2            | 1.495 (0.831 - 2.689) | 0.18               | 1.599 (0.846 - 3.024) | 0.149 |
| ASD-Reg   | vs DD       | ENA-78 Q1            | Reference             |                    | Reference             |       |
|           |             | ENA-78 Q4            | 1.088 (0.501 - 2.363) | 0.831              | 1.154 (0.508 - 2.622) | 0.732 |
|           |             | ENA-78 Q3            | 1.336 (0.636 - 2.806) | 0.444              | 1.307 (0.593 - 2.881) | 0.507 |
|           |             | ENA-78 Q2            | 1.458 (0.69 - 3.081)  | 0.324              | 1.343 (0.61 - 2.958)  | 0.463 |
|           |             | ENA-78 Q1            | Reference             |                    | Reference             |       |
| ASD-YesID | vs ASD-NoID | ENA-78 Q4            | 0.72 (0.387 - 1.341)  | 0.3                | 0.659 (0.347 - 1.254) | 0.204 |
|           |             | ENA-78 Q3            | 0.65 (0.345 - 1.222)  | 0.181              | 0.628 (0.327 - 1.207) | 0.163 |
|           |             | ENA-78 Q2            | 0.692 (0.373 - 1.285) | 0.243              | 0.704 (0.373 - 1.327) | 0.278 |
|           |             | ENA-78 Q1            | Reference             |                    | Reference             |       |
| ASD-Reg   | vs ASD-EO   | ENA-78 Q4            | 0.711 (0.349 - 1.447) | 0.346              | 0.625 (0.299 - 1.307) | 0.212 |
|           |             | ENA-78 Q3            | 1.048 (0.529 - 2.077) | 0.894              | 0.906 (0.445 - 1.846) | 0.786 |
|           |             | ENA-78 Q2            | 0.975 (0.493 - 1.927) | 0.942              | 0.84 (0.417 - 1.694)  | 0.626 |
|           |             | ENA-78 Q1            | Reference             |                    | Reference             |       |
| ASD       | vs GP       | ENA-78 ≥90%          | 1.024 (0.634 - 1.655) | 0.923              | 1.077 (0.633 - 1.832) | 0.785 |
|           |             | ENA-78 <90%          | Reference             |                    | Reference             |       |
| ASD-NoID  | vs GP       | ENA-78 ≥90%          | 1.088 (0.606 - 1.95)  | 0.778              | 0.992 (0.516 - 1.906) | 0.981 |
|           |             | ENA-78 <90%          | Reference             |                    | Reference             |       |
| ASD-YesID | vs GP       | ENA-78 ≥90%          | 0.934 (0.497 - 1.754) | 0.832              | 1.141 (0.572 - 2.278) | 0.708 |
|           |             | ENA-78 <90%          | Reference             |                    | Reference             |       |
| ASD-EO    | vs GP       | ENA-78 ≥90%          | 1.028 (0.61 - 1.734)  | 0.917              | 1.06 (0.592 - 1.901)  | 0.844 |
|           |             | ENA-78 <90%          | Reference             |                    | Reference             |       |
| ASD-Reg   | vs GP       | ENA-78 ≥90%          | 1.124 (0.537 - 2.353) | 0.757              | 1.223 (0.54 - 2.767)  | 0.629 |

|                      |              | <i>Crude</i>          |                | <i>Adjusted</i>       |                |
|----------------------|--------------|-----------------------|----------------|-----------------------|----------------|
| <i>Immune Marker</i> |              | <i>OR (95% CI)</i>    | <i>P-Value</i> | <i>OR (95% CI)</i>    | <i>P-Value</i> |
|                      | ENA-78 <90%  | Reference             |                | Reference             |                |
| DD                   | vs GP        |                       |                |                       |                |
|                      | ENA-78 ≥90%  | 1.36 (0.746 - 2.478)  | 0.315          | 1.388 (0.699 - 2.76)  | 0.349          |
|                      | ENA-78 <90%  | Reference             |                | Reference             |                |
| ASD                  | vs DD        |                       |                |                       |                |
|                      | ENA-78 ≥90%  | 0.753 (0.413 - 1.373) | 0.354          | 0.775 (0.386 - 1.557) | 0.475          |
|                      | ENA-78 <90%  | Reference             |                | Reference             |                |
| ASD-NoID             | vs DD        |                       |                |                       |                |
|                      | ENA-78 ≥90%  | 0.8 (0.403 - 1.589)   | 0.524          | 0.715 (0.322 - 1.585) | 0.408          |
|                      | ENA-78 <90%  | Reference             |                | Reference             |                |
| ASD-YesID            | vs DD        |                       |                |                       |                |
|                      | ENA-78 ≥90%  | 0.687 (0.332 - 1.42)  | 0.311          | 0.822 (0.361 - 1.869) | 0.64           |
|                      | ENA-78 <90%  | Reference             |                | Reference             |                |
| ASD-EO               | vs DD        |                       |                |                       |                |
|                      | ENA-78 ≥90%  | 0.756 (0.401 - 1.427) | 0.388          | 0.764 (0.364 - 1.602) | 0.476          |
|                      | ENA-78 <90%  | Reference             |                | Reference             |                |
| ASD-Reg              | vs DD        |                       |                |                       |                |
|                      | ENA-78 ≥90%  | 0.827 (0.363 - 1.881) | 0.65           | 0.881 (0.349 - 2.224) | 0.788          |
|                      | ENA-78 <90%  | Reference             |                | Reference             |                |
| ASD-YesID            | vs ASD-NoID  |                       |                |                       |                |
|                      | ENA-78 ≥90%  | 0.859 (0.421 - 1.752) | 0.676          | 1.15 (0.522 - 2.533)  | 0.729          |
|                      | ENA-78 <90%  | Reference             |                | Reference             |                |
| ASD-Reg              | vs ASD-EO    |                       |                |                       |                |
|                      | ENA-78 ≥90%  | 1.093 (0.507 - 2.355) | 0.82           | 1.153 (0.491 - 2.708) | 0.744          |
|                      | ENA-78 <90%  | Reference             |                | Reference             |                |
| ASD                  | vs GP        |                       |                |                       |                |
|                      | EOTAXIN-1 Q4 | 1.451 (0.959 - 2.196) | 0.078          | 1.427 (0.933 - 2.181) | 0.101          |
|                      | EOTAXIN-1 Q3 | 1.374 (0.912 - 2.072) | 0.129          | 1.421 (0.933 - 2.167) | 0.102          |
|                      | EOTAXIN-1 Q2 | 1.252 (0.826 - 1.899) | 0.289          | 1.214 (0.791 - 1.865) | 0.375          |
|                      | EOTAXIN-1 Q1 | Reference             |                | Reference             |                |
| ASD-NoID             | vs GP        |                       |                |                       |                |
|                      | EOTAXIN-1 Q4 | 1.94 (1.141 - 3.298)  | <b>0.014</b>   | 1.836 (1.067 - 3.157) | <b>0.028</b>   |
|                      | EOTAXIN-1 Q3 | 1.381 (0.798 - 2.391) | 0.249          | 1.42 (0.808 - 2.494)  | 0.222          |
|                      | EOTAXIN-1 Q2 | 1.872 (1.105 - 3.171) | <b>0.02</b>    | 1.799 (1.044 - 3.101) | <b>0.034</b>   |
|                      | EOTAXIN-1 Q1 | Reference             |                | Reference             |                |
| ASD-YesID            | vs GP        |                       |                |                       |                |
|                      | EOTAXIN-1 Q4 | 1.105 (0.653 - 1.871) | 0.709          | 1.126 (0.658 - 1.927) | 0.664          |

|                      |              | <i>Crude</i>          |                | <i>Adjusted</i>       |                |
|----------------------|--------------|-----------------------|----------------|-----------------------|----------------|
| <i>Immune Marker</i> |              | <i>OR (95% CI)</i>    | <i>P-Value</i> | <i>OR (95% CI)</i>    | <i>P-Value</i> |
| ASD-EO vs GP         | EOTAXIN-1 Q3 | 1.347 (0.816 - 2.226) | 0.245          | 1.406 (0.842 - 2.351) | 0.193          |
|                      | EOTAXIN-1 Q2 | 0.838 (0.485 - 1.447) | 0.526          | 0.831 (0.475 - 1.453) | 0.515          |
|                      | EOTAXIN-1 Q1 | Reference             |                | Reference             |                |
|                      | EOTAXIN-1 Q4 | 1.286 (0.817 - 2.025) | 0.278          | 1.26 (0.79 - 2.008)   | 0.332          |
|                      | EOTAXIN-1 Q3 | 1.347 (0.864 - 2.101) | 0.189          | 1.388 (0.878 - 2.194) | 0.161          |
| ASD-Reg vs GP        | EOTAXIN-1 Q2 | 1.218 (0.775 - 1.913) | 0.392          | 1.17 (0.733 - 1.867)  | 0.511          |
|                      | EOTAXIN-1 Q1 | Reference             |                | Reference             |                |
|                      | EOTAXIN-1 Q4 | 1.953 (0.995 - 3.834) | 0.052          | 1.888 (0.948 - 3.763) | 0.071          |
|                      | EOTAXIN-1 Q3 | 1.452 (0.723 - 2.918) | 0.294          | 1.441 (0.707 - 2.937) | 0.314          |
|                      | EOTAXIN-1 Q2 | 1.532 (0.766 - 3.063) | 0.228          | 1.5 (0.736 - 3.057)   | 0.264          |
| DD vs GP             | EOTAXIN-1 Q1 | Reference             |                | Reference             |                |
|                      | EOTAXIN-1 Q4 | 0.815 (0.471 - 1.409) | 0.464          | 0.626 (0.345 - 1.136) | 0.123          |
|                      | EOTAXIN-1 Q3 | 0.739 (0.427 - 1.28)  | 0.281          | 0.666 (0.37 - 1.197)  | 0.174          |
|                      | EOTAXIN-1 Q2 | 0.946 (0.56 - 1.599)  | 0.837          | 0.782 (0.448 - 1.367) | 0.389          |
| ASD vs DD            | EOTAXIN-1 Q1 | Reference             |                | Reference             |                |
|                      | EOTAXIN-1 Q4 | 1.781 (1.024 - 3.099) | <b>0.041</b>   | 2.28 (1.24 - 4.195)   | <b>0.008</b>   |
|                      | EOTAXIN-1 Q3 | 1.859 (1.065 - 3.245) | <b>0.029</b>   | 2.136 (1.167 - 3.909) | <b>0.014</b>   |
|                      | EOTAXIN-1 Q2 | 1.324 (0.774 - 2.263) | 0.306          | 1.552 (0.869 - 2.772) | 0.137          |
| ASD-NoID vs DD       | EOTAXIN-1 Q1 | Reference             |                | Reference             |                |
|                      | EOTAXIN-1 Q4 | 2.381 (1.248 - 4.54)  | <b>0.008</b>   | 2.934 (1.459 - 5.897) | <b>0.003</b>   |
|                      | EOTAXIN-1 Q3 | 1.868 (0.96 - 3.635)  | 0.066          | 2.133 (1.047 - 4.348) | <b>0.037</b>   |
|                      | EOTAXIN-1 Q2 | 1.978 (1.057 - 3.702) | <b>0.033</b>   | 2.3 (1.176 - 4.498)   | <b>0.015</b>   |
| ASD-YesID vs DD      | EOTAXIN-1 Q1 | Reference             |                | Reference             |                |
|                      | EOTAXIN-1 Q4 | 1.356 (0.714 - 2.578) | 0.352          | 1.8 (0.903 - 3.59)    | 0.095          |
|                      | EOTAXIN-1 Q3 | 1.822 (0.973 - 3.414) | 0.061          | 2.113 (1.082 - 4.129) | <b>0.029</b>   |
|                      | EOTAXIN-1 Q2 | 0.885 (0.465 - 1.684) | 0.71           | 1.062 (0.538 - 2.096) | 0.863          |
|                      | EOTAXIN-1 Q1 | Reference             |                | Reference             |                |

|           |             | <i>Immune Marker</i> | <i>Crude</i>          |                | <i>Adjusted</i>       |                |
|-----------|-------------|----------------------|-----------------------|----------------|-----------------------|----------------|
|           |             |                      | <i>OR (95% CI)</i>    | <i>P-Value</i> | <i>OR (95% CI)</i>    | <i>P-Value</i> |
| ASD-EO    | vs DD       | EOTAXIN-1 Q4         | 1.578 (0.88 - 2.83)   | 0.126          | 2.013 (1.06 - 3.822)  | <b>0.032</b>   |
|           |             | EOTAXIN-1 Q3         | 1.822 (1.017 - 3.264) | <b>0.044</b>   | 2.085 (1.108 - 3.924) | <b>0.023</b>   |
|           |             | EOTAXIN-1 Q2         | 1.287 (0.732 - 2.264) | 0.381          | 1.495 (0.812 - 2.753) | 0.196          |
|           |             | EOTAXIN-1 Q1         | Reference             |                | Reference             |                |
| ASD-Reg   | vs DD       | EOTAXIN-1 Q4         | 2.397 (1.112 - 5.168) | <b>0.026</b>   | 3.018 (1.338 - 6.809) | <b>0.008</b>   |
|           |             | EOTAXIN-1 Q3         | 1.965 (0.889 - 4.342) | 0.095          | 2.166 (0.943 - 4.972) | 0.068          |
|           |             | EOTAXIN-1 Q2         | 1.618 (0.748 - 3.5)   | 0.221          | 1.917 (0.853 - 4.308) | 0.115          |
|           |             | EOTAXIN-1 Q1         | Reference             |                | Reference             |                |
| ASD-YesID | vs ASD-NoID | EOTAXIN-1 Q4         | 0.57 (0.304 - 1.067)  | 0.079          | 0.614 (0.324 - 1.161) | 0.133          |
|           |             | EOTAXIN-1 Q3         | 0.976 (0.521 - 1.828) | 0.939          | 0.991 (0.522 - 1.88)  | 0.977          |
|           |             | EOTAXIN-1 Q2         | 0.448 (0.235 - 0.853) | <b>0.015</b>   | 0.462 (0.239 - 0.894) | <b>0.022</b>   |
|           |             | EOTAXIN-1 Q1         | Reference             |                | Reference             |                |
| ASD-Reg   | vs ASD-EO   | EOTAXIN-1 Q4         | 1.519 (0.751 - 3.074) | 0.245          | 1.499 (0.729 - 3.084) | 0.271          |
|           |             | EOTAXIN-1 Q3         | 1.078 (0.522 - 2.225) | 0.839          | 1.039 (0.495 - 2.18)  | 0.92           |
|           |             | EOTAXIN-1 Q2         | 1.257 (0.61 - 2.593)  | 0.535          | 1.282 (0.609 - 2.701) | 0.513          |
|           |             | EOTAXIN-1 Q1         | Reference             |                | Reference             |                |
| ASD       | vs GP       | EOTAXIN-1 >10%       | 1.267 (0.767 - 2.092) | 0.356          | 1.268 (0.758 - 2.12)  | 0.883          |
|           |             | EOTAXIN-1 ≤10%       | Reference             |                | Reference             |                |
| ASD-NoID  | vs GP       | EOTAXIN-1 >10%       | 1.436 (0.745 - 2.768) | 0.28           | 1.406 (0.718 - 2.755) | 0.32           |
|           |             | EOTAXIN-1 ≤10%       | Reference             |                | Reference             |                |
| ASD-YesID | vs GP       | EOTAXIN-1 >10%       | 1.189 (0.626 - 2.261) | 0.596          | 1.223 (0.635 - 2.355) | 0.547          |
|           |             | EOTAXIN-1 ≤10%       | Reference             |                | Reference             |                |
| ASD-EO    | vs GP       | EOTAXIN-1 >10%       | 1.195 (0.694 - 2.058) | 0.52           | 1.186 (0.678 - 2.073) | 0.549          |
|           |             | EOTAXIN-1 ≤10%       | Reference             |                | Reference             |                |
| ASD-Reg   | vs GP       | EOTAXIN-1 >10%       | 1.602 (0.656 - 3.912) | 0.301          | 1.583 (0.639 - 3.925) | 0.321          |
|           |             | EOTAXIN-1 ≤10%       | Reference             |                | Reference             |                |

|           |             | <i>Immune Marker</i> | <i>Crude</i>          |                | <i>Adjusted</i>       |                |
|-----------|-------------|----------------------|-----------------------|----------------|-----------------------|----------------|
|           |             |                      | <i>OR (95% CI)</i>    | <i>P-Value</i> | <i>OR (95% CI)</i>    | <i>P-Value</i> |
| DD        | vs GP       | EOTAXIN-1 >10%       | 1.006 (0.527 - 1.919) | 0.28           | 0.95 (0.477 - 1.889)  | 0.883          |
|           |             | EOTAXIN-1 ≤10%       | Reference             |                | Reference             |                |
| ASD       | vs DD       | EOTAXIN-1 >10%       | 1.259 (0.647 - 2.452) | 0.498          | 1.335 (0.651 - 2.738) | 0.43           |
|           |             | EOTAXIN-1 ≤10%       | Reference             |                | Reference             |                |
| ASD-NoID  | vs DD       | EOTAXIN-1 >10%       | 1.427 (0.648 - 3.144) | 0.377          | 1.481 (0.639 - 3.43)  | 0.359          |
|           |             | EOTAXIN-1 ≤10%       | Reference             |                | Reference             |                |
| ASD-YesID | vs DD       | EOTAXIN-1 >10%       | 1.183 (0.543 - 2.574) | 0.673          | 1.288 (0.566 - 2.932) | 0.547          |
|           |             | EOTAXIN-1 ≤10%       | Reference             |                | Reference             |                |
| ASD-EO    | vs DD       | EOTAXIN-1 >10%       | 1.188 (0.591 - 2.389) | 0.628          | 1.249 (0.588 - 2.651) | 0.563          |
|           |             | EOTAXIN-1 ≤10%       | Reference             |                | Reference             |                |
| ASD-Reg   | vs DD       | EOTAXIN-1 >10%       | 1.593 (0.589 - 4.307) | 0.359          | 1.667 (0.592 - 4.693) | 0.333          |
|           |             | EOTAXIN-1 ≤10%       | Reference             |                | Reference             |                |
| ASD-YesID | vs ASD-NoID | EOTAXIN-1 >10%       | 0.828 (0.377 - 1.819) | 0.639          | 0.87 (0.39 - 1.938)   | 0.733          |
|           |             | EOTAXIN-1 ≤10%       | Reference             |                | Reference             |                |
| ASD-Reg   | vs ASD-EO   | EOTAXIN-1 >10%       | 1.34 (0.528 - 3.401)  | 0.538          | 1.335 (0.517 - 3.448) | 0.551          |
|           |             | EOTAXIN-1 ≤10%       | Reference             |                | Reference             |                |
| ASD       | vs GP       | EOTAXIN-1 ≥90%       | 0.88 (0.542 - 1.427)  | 0.603          | 0.809 (0.477 - 1.374) | 0.433          |
|           |             | EOTAXIN-1 <90%       | Reference             |                | Reference             |                |
| ASD-NoID  | vs GP       | EOTAXIN-1 ≥90%       | 1.087 (0.614 - 1.923) | 0.776          | 0.976 (0.516 - 1.847) | 0.941          |
|           |             | EOTAXIN-1 <90%       | Reference             |                | Reference             |                |
| ASD-YesID | vs GP       | EOTAXIN-1 ≥90%       | 0.691 (0.352 - 1.356) | 0.283          | 0.642 (0.311 - 1.324) | 0.23           |
|           |             | EOTAXIN-1 <90%       | Reference             |                | Reference             |                |
| ASD-EO    | vs GP       | EOTAXIN-1 ≥90%       | 1.01 (0.605 - 1.686)  | 0.97           | 0.894 (0.507 - 1.579) | 0.701          |
|           |             | EOTAXIN-1 <90%       | Reference             |                | Reference             |                |
| ASD-Reg   | vs GP       | EOTAXIN-1 ≥90%       | 0.606 (0.249 - 1.479) | 0.272          | 0.617 (0.238 - 1.602) | 0.322          |
|           |             | EOTAXIN-1 <90%       | Reference             |                | Reference             |                |

|                       |                |  | <i>Crude</i>          |                | <i>Adjusted</i>       |                |
|-----------------------|----------------|--|-----------------------|----------------|-----------------------|----------------|
| <i>Immune Marker</i>  |                |  | <i>OR (95% CI)</i>    | <i>P-Value</i> | <i>OR (95% CI)</i>    | <i>P-Value</i> |
| DD vs GP              | EOTAXIN-1 ≥90% |  | 1.122 (0.605 - 2.079) | 0.716          | 1.685 (0.825 - 3.442) | 0.152          |
|                       | EOTAXIN-1 <90% |  | Reference             |                | Reference             |                |
| ASD vs DD             | EOTAXIN-1 ≥90% |  | 0.784 (0.418 - 1.471) | 0.449          | 0.48 (0.231 - 1)      | 0.05           |
|                       | EOTAXIN-1 <90% |  | Reference             |                | Reference             |                |
| ASD-NoID vs DD        | EOTAXIN-1 ≥90% |  | 0.969 (0.482 - 1.947) | 0.929          | 0.579 (0.256 - 1.311) | 0.19           |
|                       | EOTAXIN-1 <90% |  | Reference             |                | Reference             |                |
| ASD-YesID vs DD       | EOTAXIN-1 ≥90% |  | 0.616 (0.281 - 1.351) | 0.226          | 0.381 (0.158 - 0.919) | <b>0.032</b>   |
|                       | EOTAXIN-1 <90% |  | Reference             |                | Reference             |                |
| ASD-EO vs DD          | EOTAXIN-1 ≥90% |  | 0.9 (0.469 - 1.727)   | 0.752          | 0.531 (0.247 - 1.141) | 0.105          |
|                       | EOTAXIN-1 <90% |  | Reference             |                | Reference             |                |
| ASD-Reg vs DD         | EOTAXIN-1 ≥90% |  | 0.541 (0.203 - 1.437) | 0.218          | 0.366 (0.125 - 1.07)  | 0.066          |
|                       | EOTAXIN-1 <90% |  | Reference             |                | Reference             |                |
| ASD-YesID vs ASD-NoID | EOTAXIN-1 ≥90% |  | 0.636 (0.3 - 1.345)   | 0.236          | 0.658 (0.291 - 1.488) | 0.314          |
|                       | EOTAXIN-1 <90% |  | Reference             |                | Reference             |                |
| ASD-Reg vs ASD-EO     | EOTAXIN-1 ≥90% |  | 0.6 (0.24 - 1.5)      | 0.275          | 0.69 (0.258 - 1.849)  | 0.461          |
|                       | EOTAXIN-1 <90% |  | Reference             |                | Reference             |                |
| ASD vs GP             | EOTAXIN-2 Q4   |  | 1.004 (0.667 - 1.509) | 0.987          | 0.981 (0.64 - 1.505)  | 0.93           |
|                       | EOTAXIN-2 Q3   |  | 1.004 (0.667 - 1.509) | 0.987          | 0.954 (0.623 - 1.462) | 0.83           |
|                       | EOTAXIN-2 Q2   |  | 0.721 (0.483 - 1.075) | 0.109          | 0.688 (0.455 - 1.039) | 0.075          |
|                       | EOTAXIN-2 Q1   |  | Reference             |                | Reference             |                |
| ASD-NoID vs GP        | EOTAXIN-2 Q4   |  | 1.057 (0.635 - 1.762) | 0.83           | 1.002 (0.587 - 1.709) | 0.995          |
|                       | EOTAXIN-2 Q3   |  | 1.082 (0.65 - 1.798)  | 0.763          | 0.983 (0.577 - 1.674) | 0.95           |
|                       | EOTAXIN-2 Q2   |  | 0.877 (0.535 - 1.44)  | 0.605          | 0.818 (0.49 - 1.363)  | 0.44           |
|                       | EOTAXIN-2 Q1   |  | Reference             |                | Reference             |                |
| ASD-YesID vs GP       | EOTAXIN-2 Q4   |  | 0.987 (0.591 - 1.648) | 0.96           | 1.009 (0.59 - 1.724)  | 0.975          |
|                       | EOTAXIN-2 Q3   |  | 1.01 (0.606 - 1.684)  | 0.968          | 0.99 (0.581 - 1.686)  | 0.971          |

|                      |              | <b>Crude</b>          |                | <b>Adjusted</b>       |                |
|----------------------|--------------|-----------------------|----------------|-----------------------|----------------|
| <b>Immune Marker</b> |              | <b>OR (95% CI)</b>    | <b>P-Value</b> | <b>OR (95% CI)</b>    | <b>P-Value</b> |
| ASD-EO vs GP         | EOTAXIN-2 Q2 | 0.602 (0.356 - 1.02)  | 0.059          | 0.59 (0.344 - 1.012)  | 0.055          |
|                      | EOTAXIN-2 Q1 | Reference             |                | Reference             |                |
|                      | EOTAXIN-2 Q4 | 0.923 (0.589 - 1.447) | 0.728          | 0.874 (0.545 - 1.401) | 0.576          |
|                      | EOTAXIN-2 Q3 | 1.102 (0.711 - 1.708) | 0.663          | 1.029 (0.65 - 1.631)  | 0.902          |
| ASD-Reg vs GP        | EOTAXIN-2 Q2 | 0.717 (0.463 - 1.112) | 0.137          | 0.672 (0.427 - 1.058) | 0.086          |
|                      | EOTAXIN-2 Q1 | Reference             |                | Reference             |                |
|                      | EOTAXIN-2 Q4 | 1.142 (0.616 - 2.119) | 0.674          | 1.206 (0.633 - 2.3)   | 0.569          |
|                      | EOTAXIN-2 Q3 | 0.846 (0.439 - 1.632) | 0.618          | 0.864 (0.436 - 1.713) | 0.676          |
| DD vs GP             | EOTAXIN-2 Q2 | 0.657 (0.343 - 1.258) | 0.205          | 0.622 (0.32 - 1.209)  | 0.161          |
|                      | EOTAXIN-2 Q1 | Reference             |                | Reference             |                |
|                      | EOTAXIN-2 Q4 | 0.68 (0.386 - 1.197)  | 0.181          | 0.827 (0.448 - 1.526) | 0.544          |
|                      | EOTAXIN-2 Q3 | 1.032 (0.613 - 1.737) | 0.905          | 1.045 (0.594 - 1.84)  | 0.879          |
| ASD vs DD            | EOTAXIN-2 Q2 | 0.587 (0.341 - 1.011) | 0.055          | 0.722 (0.404 - 1.294) | 0.274          |
|                      | EOTAXIN-2 Q1 | Reference             |                | Reference             |                |
|                      | EOTAXIN-2 Q4 | 1.476 (0.843 - 2.586) | 0.173          | 1.186 (0.641 - 2.195) | 0.587          |
|                      | EOTAXIN-2 Q3 | 0.972 (0.581 - 1.628) | 0.914          | 0.913 (0.517 - 1.614) | 0.755          |
| ASD-NoID vs DD       | EOTAXIN-2 Q2 | 1.229 (0.708 - 2.131) | 0.464          | 0.952 (0.524 - 1.73)  | 0.871          |
|                      | EOTAXIN-2 Q1 | Reference             |                | Reference             |                |
|                      | EOTAXIN-2 Q4 | 1.556 (0.821 - 2.947) | 0.175          | 1.211 (0.605 - 2.425) | 0.589          |
|                      | EOTAXIN-2 Q3 | 1.048 (0.576 - 1.906) | 0.879          | 0.941 (0.49 - 1.807)  | 0.855          |
| ASD-YesID vs DD      | EOTAXIN-2 Q2 | 1.495 (0.802 - 2.789) | 0.206          | 1.132 (0.579 - 2.212) | 0.718          |
|                      | EOTAXIN-2 Q1 | Reference             |                | Reference             |                |
|                      | EOTAXIN-2 Q4 | 1.452 (0.765 - 2.755) | 0.254          | 1.219 (0.609 - 2.44)  | 0.575          |
|                      | EOTAXIN-2 Q3 | 0.979 (0.537 - 1.783) | 0.944          | 0.948 (0.494 - 1.817) | 0.871          |
| ASD-EO vs DD         | EOTAXIN-2 Q2 | 1.027 (0.536 - 1.965) | 0.937          | 0.817 (0.41 - 1.629)  | 0.566          |
|                      | EOTAXIN-2 Q1 | Reference             |                | Reference             |                |
|                      | EOTAXIN-2 Q4 | 1.358 (0.752 - 2.454) | 0.31           | 1.057 (0.552 - 2.022) | 0.868          |

|           |             | <i>Crude</i>         |                       | <i>Adjusted</i>    |                       |       |
|-----------|-------------|----------------------|-----------------------|--------------------|-----------------------|-------|
|           |             | <i>OR (95% CI)</i>   | <i>P-Value</i>        | <i>OR (95% CI)</i> | <i>P-Value</i>        |       |
|           |             | <i>Immune Marker</i> |                       |                    |                       |       |
| ASD-Reg   | vs DD       | EOTAXIN-2 Q3         | 1.068 (0.622 - 1.831) | 0.812              | 0.985 (0.543 - 1.789) | 0.96  |
|           |             | EOTAXIN-2 Q2         | 1.223 (0.685 - 2.182) | 0.497              | 0.931 (0.496 - 1.744) | 0.822 |
|           |             | EOTAXIN-2 Q1         | Reference             |                    | Reference             |       |
|           |             | EOTAXIN-2 Q4         | 1.68 (0.811 - 3.478)  | 0.162              | 1.458 (0.669 - 3.18)  | 0.343 |
|           |             | EOTAXIN-2 Q3         | 0.82 (0.395 - 1.698)  | 0.592              | 0.827 (0.38 - 1.801)  | 0.633 |
|           |             | EOTAXIN-2 Q2         | 1.12 (0.528 - 2.375)  | 0.768              | 0.861 (0.391 - 1.897) | 0.71  |
|           |             | EOTAXIN-2 Q1         | Reference             |                    | Reference             |       |
| ASD-YesID | vs ASD-NoID | EOTAXIN-2 Q4         | 0.933 (0.516 - 1.688) | 0.82               | 1.007 (0.543 - 1.867) | 0.982 |
|           |             | EOTAXIN-2 Q3         | 0.934 (0.518 - 1.684) | 0.821              | 1.007 (0.545 - 1.86)  | 0.982 |
|           |             | EOTAXIN-2 Q2         | 0.687 (0.373 - 1.262) | 0.226              | 0.722 (0.387 - 1.345) | 0.305 |
|           |             | EOTAXIN-2 Q1         | Reference             |                    | Reference             |       |
| ASD-Reg   | vs ASD-EO   | EOTAXIN-2 Q4         | 1.237 (0.651 - 2.35)  | 0.516              | 1.38 (0.705 - 2.701)  | 0.347 |
|           |             | EOTAXIN-2 Q3         | 0.768 (0.392 - 1.503) | 0.44               | 0.84 (0.416 - 1.694)  | 0.626 |
|           |             | EOTAXIN-2 Q2         | 0.916 (0.464 - 1.808) | 0.801              | 0.925 (0.461 - 1.856) | 0.827 |
|           |             | EOTAXIN-2 Q1         | Reference             |                    | Reference             |       |
| ASD       | vs GP       | EOTAXIN-2 ≥90%       | 1.319 (0.804 - 2.164) | 0.273              | 1.284 (0.762 - 2.163) | 0.347 |
|           |             | EOTAXIN-2 <90%       | Reference             |                    | Reference             |       |
| ASD-NoID  | vs GP       | EOTAXIN-2 ≥90%       | 1.399 (0.774 - 2.53)  | 0.267              | 1.199 (0.639 - 2.25)  | 0.571 |
|           |             | EOTAXIN-2 <90%       | Reference             |                    | Reference             |       |
| ASD-YesID | vs GP       | EOTAXIN-2 ≥90%       | 1.052 (0.544 - 2.034) | 0.881              | 1.141 (0.571 - 2.28)  | 0.71  |
|           |             | EOTAXIN-2 <90%       | Reference             |                    | Reference             |       |
| ASD-EO    | vs GP       | EOTAXIN-2 ≥90%       | 1.3 (0.76 - 2.224)    | 0.337              | 1.238 (0.702 - 2.184) | 0.461 |
|           |             | EOTAXIN-2 <90%       | Reference             |                    | Reference             |       |
| ASD-Reg   | vs GP       | EOTAXIN-2 ≥90%       | 1.365 (0.643 - 2.897) | 0.418              | 1.395 (0.627 - 3.101) | 0.415 |
|           |             | EOTAXIN-2 <90%       | Reference             |                    | Reference             |       |
| DD        | vs GP       | EOTAXIN-2 ≥90%       | 0.769 (0.356 - 1.659) | 0.503              | 1.284 (0.559 - 2.951) | 0.556 |
|           |             | EOTAXIN-2 <90%       | Reference             |                    | Reference             |       |



|                      |             |                | <i>Crude</i>          |                | <i>Adjusted</i>       |                |
|----------------------|-------------|----------------|-----------------------|----------------|-----------------------|----------------|
| <i>Immune Marker</i> |             |                | <i>OR (95% CI)</i>    | <i>P-Value</i> | <i>OR (95% CI)</i>    | <i>P-Value</i> |
| ASD                  | vs DD       | EOTAXIN-2 ≥90% | 1.715 (0.808 - 3.64)  | 0.16           | 1 (0.441 - 2.27)      | 1              |
|                      |             | EOTAXIN-2 <90% | Reference             |                | Reference             |                |
| ASD-NoID             | vs DD       | EOTAXIN-2 ≥90% | 1.819 (0.801 - 4.131) | 0.152          | 0.934 (0.383 - 2.279) | 0.881          |
|                      |             | EOTAXIN-2 <90% | Reference             |                | Reference             |                |
| ASD-YesID            | vs DD       | EOTAXIN-2 ≥90% | 1.368 (0.573 - 3.263) | 0.48           | 0.888 (0.348 - 2.266) | 0.804          |
|                      |             | EOTAXIN-2 <90% | Reference             |                | Reference             |                |
| ASD-EO               | vs DD       | EOTAXIN-2 ≥90% | 1.691 (0.775 - 3.691) | 0.187          | 0.964 (0.411 - 2.261) | 0.933          |
|                      |             | EOTAXIN-2 <90% | Reference             |                | Reference             |                |
| ASD-Reg              | vs DD       | EOTAXIN-2 ≥90% | 1.775 (0.692 - 4.553) | 0.232          | 1.086 (0.394 - 2.995) | 0.873          |
|                      |             | EOTAXIN-2 <90% | Reference             |                | Reference             |                |
| ASD-YesID            | vs ASD-NoID | EOTAXIN-2 ≥90% | 0.752 (0.366 - 1.542) | 0.436          | 0.951 (0.444 - 2.039) | 0.897          |
|                      |             | EOTAXIN-2 <90% | Reference             |                | Reference             |                |
| ASD-Reg              | vs ASD-EO   | EOTAXIN-2 ≥90% | 1.05 (0.489 - 2.254)  | 0.901          | 1.127 (0.498 - 2.548) | 0.775          |
|                      |             | EOTAXIN-2 <90% | Reference             |                | Reference             |                |
| ASD                  | vs GP       | EOTAXIN-3      | 1.41 (0.926 - 2.148)  | 0.109          | 1.455 (0.869 - 2.434) | 0.154          |
| ASD-NoID             | vs GP       | EOTAXIN-3      | 1.425 (0.843 - 2.408) | 0.186          | 1.392 (0.725 - 2.673) | 0.321          |
| ASD-YesID            | vs GP       | EOTAXIN-3      | 1.184 (0.693 - 2.02)  | 0.537          | 1.403 (0.725 - 2.715) | 0.315          |
| ASD-EO               | vs GP       | EOTAXIN-3      | 1.276 (0.808 - 2.014) | 0.296          | 1.222 (0.695 - 2.149) | 0.485          |
| ASD-Reg              | vs GP       | EOTAXIN-3      | 1.909 (0.957 - 3.807) | 0.067          | 2.439 (1.059 - 5.615) | <b>0.036</b>   |
| DD                   | vs GP       | EOTAXIN-3      | 0.823 (0.479 - 1.413) | 0.479          | 1.308 (0.664 - 2.58)  | 0.438          |
| ASD                  | vs DD       | EOTAXIN-3      | 1.714 (0.986 - 2.98)  | 0.056          | 1.112 (0.549 - 2.252) | 0.769          |
| ASD-NoID             | vs DD       | EOTAXIN-3      | 1.732 (0.917 - 3.269) | 0.09           | 1.064 (0.472 - 2.397) | 0.882          |
| ASD-YesID            | vs DD       | EOTAXIN-3      | 1.439 (0.756 - 2.737) | 0.268          | 1.072 (0.474 - 2.423) | 0.867          |
| ASD-EO               | vs DD       | EOTAXIN-3      | 1.551 (0.868 - 2.77)  | 0.138          | 0.934 (0.444 - 1.967) | 0.858          |
| ASD-Reg              | vs DD       | EOTAXIN-3      | 2.32 (1.065 - 5.055)  | <b>0.034</b>   | 1.864 (0.714 - 4.868) | 0.204          |

|                      |             |             | <i>Crude</i>          |                | <i>Adjusted</i>       |                |
|----------------------|-------------|-------------|-----------------------|----------------|-----------------------|----------------|
| <i>Immune Marker</i> |             |             | <i>OR (95% CI)</i>    | <i>P-Value</i> | <i>OR (95% CI)</i>    | <i>P-Value</i> |
| ASD-YesID            | vs ASD-NoID | EOTAXIN-3   | 0.831 (0.444 - 1.555) | 0.562          | 1.008 (0.46 - 2.208)  | 0.985          |
| ASD-Reg              | vs ASD-EO   | EOTAXIN-3   | 1.496 (0.73 - 3.068)  | 0.271          | 1.995 (0.831 - 4.791) | 0.122          |
| ASD                  | vs GP       | Fractalkine | 1.295 (0.781 - 2.146) | 0.316          | 1.359 (0.76 - 2.43)   | 0.301          |
| ASD-NoID             | vs GP       | Fractalkine | 1.134 (0.609 - 2.11)  | 0.692          | 1.21 (0.59 - 2.483)   | 0.603          |
| ASD-YesID            | vs GP       | Fractalkine | 1.355 (0.705 - 2.603) | 0.362          | 1.468 (0.686 - 3.141) | 0.322          |
| ASD-EO               | vs GP       | Fractalkine | 1.132 (0.656 - 1.955) | 0.656          | 1.167 (0.619 - 2.199) | 0.633          |
| ASD-Reg              | vs GP       | Fractalkine | 1.933 (0.845 - 4.418) | 0.118          | 2.321 (0.889 - 6.06)  | 0.086          |
| DD                   | vs GP       | Fractalkine | 0.95 (0.489 - 1.845)  | 0.879          | 1.284 (0.602 - 2.739) | 0.518          |
| ASD                  | vs DD       | Fractalkine | 1.363 (0.694 - 2.677) | 0.368          | 1.058 (0.481 - 2.327) | 0.888          |
| ASD-NoID             | vs DD       | Fractalkine | 1.194 (0.555 - 2.566) | 0.65           | 0.943 (0.386 - 2.304) | 0.897          |
| ASD-YesID            | vs DD       | Fractalkine | 1.427 (0.647 - 3.148) | 0.379          | 1.143 (0.453 - 2.884) | 0.777          |
| ASD-EO               | vs DD       | Fractalkine | 1.192 (0.589 - 2.413) | 0.626          | 0.909 (0.397 - 2.082) | 0.821          |
| ASD-Reg              | vs DD       | Fractalkine | 2.035 (0.795 - 5.21)  | 0.139          | 1.807 (0.605 - 5.399) | 0.289          |
| ASD-YesID            | vs ASD-NoID | Fractalkine | 1.195 (0.562 - 2.54)  | 0.643          | 1.213 (0.501 - 2.937) | 0.669          |
| ASD-Reg              | vs ASD-EO   | Fractalkine | 1.707 (0.724 - 4.028) | 0.222          | 1.989 (0.728 - 5.433) | 0.18           |
| ASD                  | vs GP       | GCP-2       | 1.139 (0.701 - 1.851) | 0.599          | 1.416 (0.778 - 2.577) | 0.255          |
| ASD-NoID             | vs GP       | GCP-2       | 1.562 (0.861 - 2.832) | 0.142          | 2.18 (1.032 - 4.604)  | <b>0.041</b>   |
| ASD-YesID            | vs GP       | GCP-2       | 0.851 (0.455 - 1.591) | 0.612          | 0.996 (0.462 - 2.151) | 0.993          |
| ASD-EO               | vs GP       | GCP-2       | 1.2 (0.707 - 2.037)   | 0.499          | 1.588 (0.825 - 3.058) | 0.167          |
| ASD-Reg              | vs GP       | GCP-2       | 1.028 (0.475 - 2.228) | 0.943          | 1.183 (0.446 - 3.144) | 0.735          |
| DD                   | vs GP       | GCP-2       | 0.881 (0.455 - 1.707) | 0.708          | 0.699 (0.311 - 1.568) | 0.385          |
| ASD                  | vs DD       | GCP-2       | 1.292 (0.667 - 2.505) | 0.448          | 2.027 (0.884 - 4.647) | 0.095          |
| ASD-NoID             | vs DD       | GCP-2       | 1.772 (0.84 - 3.738)  | 0.133          | 3.121 (1.211 - 8.041) | <b>0.018</b>   |

|                      |             |                    | <i>Crude</i>          |                | <i>Adjusted</i>       |                |
|----------------------|-------------|--------------------|-----------------------|----------------|-----------------------|----------------|
| <i>Immune Marker</i> |             |                    | <i>OR (95% CI)</i>    | <i>P-Value</i> | <i>OR (95% CI)</i>    | <i>P-Value</i> |
| ASD-YesID            | vs DD       | GCP-2              | 0.965 (0.446 - 2.086) | 0.928          | 1.427 (0.55 - 3.7)    | 0.465          |
| ASD-EO               | vs DD       | GCP-2              | 1.362 (0.68 - 2.727)  | 0.383          | 2.273 (0.947 - 5.455) | 0.066          |
| ASD-Reg              | vs DD       | GCP-2              | 1.167 (0.477 - 2.854) | 0.735          | 1.694 (0.549 - 5.225) | 0.359          |
| ASD-YesID            | vs ASD-NoID | GCP-2              | 0.545 (0.266 - 1.115) | 0.096          | 0.457 (0.186 - 1.121) | 0.087          |
| ASD-Reg              | vs ASD-EO   | GCP-2              | 0.857 (0.384 - 1.91)  | 0.705          | 0.745 (0.269 - 2.065) | 0.572          |
| ASD                  | vs GP       | GM-CSF Detect      | 1.037 (0.774 - 1.388) | 0.81           | 1.066 (0.745 - 1.526) | 0.727          |
|                      |             | GM-CSF Non- Detect | Reference             |                | Reference             |                |
| ASD-NoID             | vs GP       | GM-CSF Detect      | 0.85 (0.589 - 1.227)  | 0.385          | 0.811 (0.513 - 1.281) | 0.369          |
|                      |             | GM-CSF Non- Detect | Reference             |                | Reference             |                |
| ASD-YesID            | vs GP       | GM-CSF Detect      | 1.25 (0.863 - 1.811)  | 0.238          | 1.315 (0.837 - 2.067) | 0.234          |
|                      |             | GM-CSF Non- Detect | Reference             |                | Reference             |                |
| ASD-EO               | vs GP       | GM-CSF Detect      | 1.024 (0.745 - 1.409) | 0.883          | 0.991 (0.667 - 1.471) | 0.963          |
|                      |             | GM-CSF Non- Detect | Reference             |                | Reference             |                |
| ASD-Reg              | vs GP       | GM-CSF Detect      | 1.058 (0.666 - 1.681) | 0.812          | 1.289 (0.732 - 2.27)  | 0.379          |
|                      |             | GM-CSF Non- Detect | Reference             |                | Reference             |                |
| DD                   | vs GP       | GM-CSF Detect      | 1.032 (0.695 - 1.532) | 0.874          | 1.102 (0.678 - 1.791) | 0.696          |
|                      |             | GM-CSF Non- Detect | Reference             |                | Reference             |                |
| ASD                  | vs DD       | GM-CSF Detect      | 1.004 (0.676 - 1.492) | 0.984          | 0.968 (0.59 - 1.586)  | 0.896          |
|                      |             | GM-CSF Non- Detect | Reference             |                | Reference             |                |
| ASD-NoID             | vs DD       | GM-CSF Detect      | 0.823 (0.523 - 1.296) | 0.401          | 0.736 (0.416 - 1.302) | 0.292          |
|                      |             | GM-CSF Non- Detect | Reference             |                | Reference             |                |
| ASD-YesID            | vs DD       | GM-CSF Detect      | 1.211 (0.767 - 1.912) | 0.412          | 1.194 (0.68 - 2.097)  | 0.537          |
|                      |             | GM-CSF Non- Detect | Reference             |                | Reference             |                |
| ASD-EO               | vs DD       | GM-CSF Detect      | 0.992 (0.655 - 1.504) | 0.97           | 0.899 (0.533 - 1.517) | 0.69           |
|                      |             | GM-CSF Non- Detect | Reference             |                | Reference             |                |
| ASD-Reg              | vs DD       | GM-CSF Detect      | 1.025 (0.6 - 1.749)   | 0.929          | 1.17 (0.607 - 2.254)  | 0.639          |

|           |             | <b>Crude</b>         |                       | <b>Adjusted</b>    |                       |       |
|-----------|-------------|----------------------|-----------------------|--------------------|-----------------------|-------|
|           |             | <b>OR (95% CI)</b>   | <b>P-Value</b>        | <b>OR (95% CI)</b> | <b>P-Value</b>        |       |
|           |             | <b>Immune Marker</b> |                       |                    |                       |       |
|           |             | GM-CSF Non- Detect   | Reference             | Reference          |                       |       |
| ASD-YesID | vs ASD-NoID | GM-CSF Detect        | 1.471 (0.954 - 2.268) | 0.081              | 1.622 (0.949 - 2.773) | 0.077 |
|           |             | GM-CSF Non- Detect   | Reference             | Reference          |                       |       |
| ASD-Reg   | vs ASD-EO   | GM-CSF Detect        | 1.033 (0.638 - 1.671) | 0.895              | 1.301 (0.72 - 2.353)  | 0.383 |
|           |             | GM-CSF Non- Detect   | Reference             | Reference          |                       |       |
| ASD       | vs GP       | GM-CSF ≥90%          | 0.941 (0.59 - 1.5)    | 0.798              | 0.978 (0.586 - 1.631) | 0.931 |
|           |             | GM-CSF <90%          | Reference             | Reference          |                       |       |
| ASD-NoID  | vs GP       | GM-CSF ≥90%          | 0.693 (0.368 - 1.307) | 0.258              | 0.63 (0.314 - 1.263)  | 0.193 |
|           |             | GM-CSF <90%          | Reference             | Reference          |                       |       |
| ASD-YesID | vs GP       | GM-CSF ≥90%          | 1.15 (0.651 - 2.031)  | 0.631              | 1.298 (0.691 - 2.438) | 0.417 |
|           |             | GM-CSF <90%          | Reference             | Reference          |                       |       |
| ASD-EO    | vs GP       | GM-CSF ≥90%          | 0.917 (0.549 - 1.532) | 0.741              | 0.943 (0.536 - 1.659) | 0.839 |
|           |             | GM-CSF <90%          | Reference             | Reference          |                       |       |
| ASD-Reg   | vs GP       | GM-CSF ≥90%          | 0.891 (0.417 - 1.907) | 0.767              | 0.918 (0.4 - 2.106)   | 0.839 |
|           |             | GM-CSF <90%          | Reference             | Reference          |                       |       |
| DD        | vs GP       | GM-CSF ≥90%          | 0.913 (0.481 - 1.733) | 0.781              | 0.703 (0.338 - 1.462) | 0.346 |
|           |             | GM-CSF <90%          | Reference             | Reference          |                       |       |
| ASD       | vs DD       | GM-CSF ≥90%          | 1.03 (0.54 - 1.966)   | 0.928              | 1.39 (0.659 - 2.932)  | 0.387 |
|           |             | GM-CSF <90%          | Reference             | Reference          |                       |       |
| ASD-NoID  | vs DD       | GM-CSF ≥90%          | 0.759 (0.349 - 1.649) | 0.486              | 0.896 (0.37 - 2.168)  | 0.808 |
|           |             | GM-CSF <90%          | Reference             | Reference          |                       |       |
| ASD-YesID | vs DD       | GM-CSF ≥90%          | 1.259 (0.61 - 2.596)  | 0.533              | 1.846 (0.806 - 4.23)  | 0.147 |
|           |             | GM-CSF <90%          | Reference             | Reference          |                       |       |
| ASD-EO    | vs DD       | GM-CSF ≥90%          | 1.004 (0.508 - 1.983) | 0.991              | 1.341 (0.611 - 2.945) | 0.465 |
|           |             | GM-CSF <90%          | Reference             | Reference          |                       |       |
| ASD-Reg   | vs DD       | GM-CSF ≥90%          | 0.976 (0.404 - 2.358) | 0.957              | 1.305 (0.486 - 3.501) | 0.597 |

|           |             | <i>Crude</i>         |                       |                | <i>Adjusted</i>       |                |
|-----------|-------------|----------------------|-----------------------|----------------|-----------------------|----------------|
|           |             | <i>Immune Marker</i> | <i>OR (95% CI)</i>    | <i>P-Value</i> | <i>OR (95% CI)</i>    | <i>P-Value</i> |
|           |             | GM-CSF <90%          | Reference             |                | Reference             |                |
| ASD-YesID | vs ASD-NoID | GM-CSF ≥90%          | 1.658 (0.808 - 3.402) | 0.168          | 2.06 (0.931 - 4.559)  | 0.075          |
|           |             | GM-CSF <90%          | Reference             |                | Reference             |                |
| ASD-Reg   | vs ASD-EO   | GM-CSF ≥90%          | 0.972 (0.439 - 2.151) | 0.944          | 0.973 (0.407 - 2.326) | 0.951          |
|           |             | GM-CSF <90%          | Reference             |                | Reference             |                |
| ASD       | vs GP       | GRO-A                | 1.224 (0.819 - 1.83)  | 0.324          | 1.455 (0.901 - 2.35)  | 0.125          |
| ASD-NoID  | vs GP       | GRO-A                | 1.134 (0.689 - 1.866) | 0.621          | 1.596 (0.877 - 2.907) | 0.126          |
| ASD-YesID | vs GP       | GRO-A                | 1.316 (0.788 - 2.199) | 0.294          | 1.293 (0.703 - 2.379) | 0.408          |
| ASD-EO    | vs GP       | GRO-A                | 1.328 (0.857 - 2.057) | 0.204          | 1.655 (0.979 - 2.798) | 0.06           |
| ASD-Reg   | vs GP       | GRO-A                | 1.026 (0.54 - 1.948)  | 0.937          | 1.197 (0.561 - 2.553) | 0.643          |
| DD        | vs GP       | GRO-A                | 0.868 (0.502 - 1.502) | 0.613          | 0.852 (0.442 - 1.645) | 0.634          |
| ASD       | vs DD       | GRO-A                | 1.41 (0.814 - 2.442)  | 0.22           | 1.707 (0.874 - 3.332) | 0.117          |
| ASD-NoID  | vs DD       | GRO-A                | 1.306 (0.701 - 2.435) | 0.4            | 1.872 (0.875 - 4.007) | 0.106          |
| ASD-YesID | vs DD       | GRO-A                | 1.516 (0.804 - 2.862) | 0.199          | 1.517 (0.706 - 3.257) | 0.285          |
| ASD-EO    | vs DD       | GRO-A                | 1.53 (0.86 - 2.72)    | 0.148          | 1.942 (0.959 - 3.929) | 0.065          |
| ASD-Reg   | vs DD       | GRO-A                | 1.182 (0.563 - 2.483) | 0.659          | 1.404 (0.579 - 3.4)   | 0.453          |
| ASD-YesID | vs ASD-NoID | GRO-A                | 1.161 (0.643 - 2.097) | 0.621          | 0.81 (0.399 - 1.647)  | 0.561          |
| ASD-Reg   | vs ASD-EO   | GRO-A                | 0.773 (0.398 - 1.501) | 0.447          | 0.723 (0.328 - 1.593) | 0.421          |
| ASD       | vs GP       | GRO-B                | 1.126 (0.846 - 1.498) | 0.417          | 1.128 (0.787 - 1.615) | 0.513          |
| ASD-NoID  | vs GP       | GRO-B                | 1.108 (0.778 - 1.579) | 0.569          | 1.297 (0.828 - 2.032) | 0.257          |
| ASD-YesID | vs GP       | GRO-B                | 1.129 (0.783 - 1.63)  | 0.515          | 0.96 (0.605 - 1.524)  | 0.864          |
| ASD-EO    | vs GP       | GRO-B                | 1.162 (0.851 - 1.589) | 0.345          | 1.188 (0.801 - 1.76)  | 0.391          |
| ASD-Reg   | vs GP       | GRO-B                | 1.088 (0.691 - 1.714) | 0.716          | 1.091 (0.612 - 1.945) | 0.768          |

|                      |             |          | <i>Crude</i>          |                | <i>Adjusted</i>        |                |
|----------------------|-------------|----------|-----------------------|----------------|------------------------|----------------|
| <i>Immune Marker</i> |             |          | <i>OR (95% CI)</i>    | <i>P-Value</i> | <i>OR (95% CI)</i>     | <i>P-Value</i> |
| DD                   | vs GP       | GRO-B    | 0.837 (0.57 - 1.228)  | 0.362          | 0.852 (0.515 - 1.408)  | 0.532          |
| ASD                  | vs DD       | GRO-B    | 1.345 (0.915 - 1.978) | 0.131          | 1.324 (0.794 - 2.208)  | 0.282          |
| ASD-NoID             | vs DD       | GRO-B    | 1.325 (0.854 - 2.054) | 0.209          | 1.523 (0.854 - 2.717)  | 0.154          |
| ASD-YesID            | vs DD       | GRO-B    | 1.35 (0.862 - 2.114)  | 0.19           | 1.128 (0.628 - 2.026)  | 0.688          |
| ASD-EO               | vs DD       | GRO-B    | 1.389 (0.926 - 2.084) | 0.112          | 1.395 (0.814 - 2.388)  | 0.226          |
| ASD-Reg              | vs DD       | GRO-B    | 1.301 (0.771 - 2.194) | 0.325          | 1.281 (0.65 - 2.525)   | 0.474          |
| ASD-YesID            | vs ASD-NoID | GRO-B    | 1.019 (0.667 - 1.556) | 0.93           | 0.741 (0.433 - 1.267)  | 0.273          |
| ASD-Reg              | vs ASD-EO   | GRO-B    | 0.936 (0.583 - 1.502) | 0.784          | 0.919 (0.503 - 1.679)  | 0.783          |
| ASD                  | vs GP       | I-309    | 1.301 (0.72 - 2.351)  | 0.383          | 1.353 (0.695 - 2.633)  | 0.374          |
| ASD-NoID             | vs GP       | I-309    | 1.711 (0.8 - 3.66)    | 0.166          | 1.832 (0.767 - 4.378)  | 0.173          |
| ASD-YesID            | vs GP       | I-309    | 0.952 (0.458 - 1.979) | 0.895          | 1.056 (0.468 - 2.379)  | 0.896          |
| ASD-EO               | vs GP       | I-309    | 1.094 (0.58 - 2.064)  | 0.781          | 1.131 (0.558 - 2.294)  | 0.732          |
| ASD-Reg              | vs GP       | I-309    | 2.201 (0.802 - 6.041) | 0.126          | 3.195 (0.953 - 10.714) | 0.06           |
| DD                   | vs GP       | I-309    | 1.379 (0.611 - 3.112) | 0.439          | 2.021 (0.752 - 5.429)  | 0.163          |
| ASD                  | vs DD       | I-309    | 0.944 (0.413 - 2.154) | 0.89           | 0.669 (0.244 - 1.833)  | 0.435          |
| ASD-NoID             | vs DD       | I-309    | 1.241 (0.479 - 3.216) | 0.657          | 0.907 (0.286 - 2.869)  | 0.868          |
| ASD-YesID            | vs DD       | I-309    | 0.69 (0.271 - 1.755)  | 0.436          | 0.522 (0.172 - 1.585)  | 0.252          |
| ASD-EO               | vs DD       | I-309    | 0.793 (0.336 - 1.871) | 0.597          | 0.56 (0.198 - 1.584)   | 0.274          |
| ASD-Reg              | vs DD       | I-309    | 1.596 (0.5 - 5.093)   | 0.43           | 1.581 (0.384 - 6.506)  | 0.526          |
| ASD-YesID            | vs ASD-NoID | I-309    | 0.556 (0.229 - 1.351) | 0.195          | 0.576 (0.213 - 1.56)   | 0.278          |
| ASD-Reg              | vs ASD-EO   | I-309    | 2.012 (0.707 - 5.72)  | 0.19           | 2.824 (0.815 - 9.786)  | 0.101          |
| ASD                  | vs GP       | IFN-g Q4 | 1.428 (0.945 - 2.158) | 0.091          | 1.391 (0.903 - 2.144)  | 0.134          |
|                      |             | IFN-g Q3 | 1.218 (0.809 - 1.834) | 0.344          | 1.168 (0.765 - 1.784)  | 0.471          |
|                      |             | IFN-g Q2 | 1.297 (0.859 - 1.958) | 0.216          | 1.299 (0.851 - 1.982)  | 0.226          |

|                      |          | <i>Crude</i>          |                | <i>Adjusted</i>       |                |
|----------------------|----------|-----------------------|----------------|-----------------------|----------------|
| <i>Immune Marker</i> |          | <i>OR (95% CI)</i>    | <i>P-Value</i> | <i>OR (95% CI)</i>    | <i>P-Value</i> |
|                      | IFN-g Q1 | Reference             |                | Reference             |                |
| ASD-NoID vs GP       | IFN-g Q4 | 1.371 (0.822 - 2.285) | 0.227          | 1.285 (0.752 - 2.194) | 0.359          |
|                      | IFN-g Q3 | 1.32 (0.8 - 2.177)    | 0.277          | 1.246 (0.741 - 2.096) | 0.407          |
|                      | IFN-g Q2 | 1.108 (0.657 - 1.867) | 0.701          | 1.107 (0.647 - 1.894) | 0.711          |
| ASD-YesID vs GP      | IFN-g Q1 | Reference             |                | Reference             |                |
|                      | IFN-g Q4 | 1.474 (0.867 - 2.505) | 0.152          | 1.513 (0.871 - 2.628) | 0.142          |
|                      | IFN-g Q3 | 1.077 (0.626 - 1.854) | 0.788          | 1.042 (0.597 - 1.818) | 0.885          |
|                      | IFN-g Q2 | 1.457 (0.862 - 2.462) | 0.16           | 1.457 (0.853 - 2.489) | 0.168          |
| ASD-EO vs GP         | IFN-g Q1 | Reference             |                | Reference             |                |
|                      | IFN-g Q4 | 1.378 (0.88 - 2.156)  | 0.161          | 1.345 (0.841 - 2.152) | 0.216          |
|                      | IFN-g Q3 | 1.141 (0.73 - 1.784)  | 0.563          | 1.073 (0.674 - 1.708) | 0.766          |
| ASD-Reg vs GP        | IFN-g Q2 | 1.232 (0.787 - 1.93)  | 0.361          | 1.249 (0.787 - 1.983) | 0.345          |
|                      | IFN-g Q1 | Reference             |                | Reference             |                |
|                      | IFN-g Q4 | 1.507 (0.756 - 3.003) | 0.244          | 1.42 (0.694 - 2.909)  | 0.337          |
|                      | IFN-g Q3 | 1.514 (0.773 - 2.965) | 0.226          | 1.45 (0.729 - 2.887)  | 0.29           |
| DD vs GP             | IFN-g Q2 | 1.612 (0.821 - 3.162) | 0.165          | 1.55 (0.778 - 3.088)  | 0.213          |
|                      | IFN-g Q1 | Reference             |                | Reference             |                |
|                      | IFN-g Q4 | 0.75 (0.438 - 1.286)  | 0.296          | 0.848 (0.473 - 1.519) | 0.579          |
|                      | IFN-g Q3 | 0.818 (0.49 - 1.365)  | 0.442          | 0.895 (0.515 - 1.557) | 0.695          |
| ASD vs DD            | IFN-g Q2 | 0.573 (0.326 - 1.006) | 0.053          | 0.556 (0.306 - 1.011) | 0.054          |
|                      | IFN-g Q1 | Reference             |                | Reference             |                |
|                      | IFN-g Q4 | 1.902 (1.105 - 3.275) | <b>0.02</b>    | 1.641 (0.905 - 2.975) | 0.103          |
|                      | IFN-g Q3 | 1.49 (0.883 - 2.514)  | 0.135          | 1.305 (0.736 - 2.315) | 0.362          |
| ASD-NoID vs DD       | IFN-g Q2 | 2.265 (1.279 - 4.01)  | <b>0.005</b>   | 2.335 (1.264 - 4.313) | <b>0.007</b>   |
|                      | IFN-g Q1 | Reference             |                | Reference             |                |
|                      | IFN-g Q4 | 1.826 (0.981 - 3.399) | 0.057          | 1.515 (0.772 - 2.975) | 0.227          |

|                      |             | <i>Crude</i>       |                       | <i>Adjusted</i>    |                       |              |
|----------------------|-------------|--------------------|-----------------------|--------------------|-----------------------|--------------|
| <i>Immune Marker</i> |             | <i>OR (95% CI)</i> | <i>P-Value</i>        | <i>OR (95% CI)</i> | <i>P-Value</i>        |              |
| ASD-YesID            | vs DD       | IFN-g Q3           | 1.614 (0.888 - 2.934) | 0.116              | 1.392 (0.728 - 2.662) | 0.317        |
|                      |             | IFN-g Q2           | 1.934 (1.005 - 3.725) | <b>0.048</b>       | 1.99 (0.99 - 3.999)   | 0.053        |
|                      |             | IFN-g Q1           | Reference             |                    | Reference             |              |
|                      |             | IFN-g Q4           | 1.964 (1.039 - 3.713) | <b>0.038</b>       | 1.784 (0.899 - 3.541) | 0.098        |
|                      |             | IFN-g Q3           | 1.317 (0.699 - 2.482) | 0.394              | 1.164 (0.592 - 2.288) | 0.66         |
| ASD-EO               | vs DD       | IFN-g Q2           | 2.544 (1.318 - 4.907) | <b>0.005</b>       | 2.619 (1.308 - 5.245) | <b>0.007</b> |
|                      |             | IFN-g Q1           | Reference             |                    | Reference             |              |
|                      |             | IFN-g Q4           | 1.836 (1.038 - 3.247) | <b>0.037</b>       | 1.586 (0.849 - 2.963) | 0.148        |
|                      |             | IFN-g Q3           | 1.395 (0.802 - 2.426) | 0.238              | 1.199 (0.654 - 2.197) | 0.558        |
|                      |             | IFN-g Q2           | 2.152 (1.183 - 3.914) | <b>0.012</b>       | 2.246 (1.181 - 4.27)  | <b>0.014</b> |
| ASD-Reg              | vs DD       | IFN-g Q1           | Reference             |                    | Reference             |              |
|                      |             | IFN-g Q4           | 2.008 (0.925 - 4.357) | 0.078              | 1.675 (0.736 - 3.81)  | 0.219        |
|                      |             | IFN-g Q3           | 1.851 (0.877 - 3.908) | 0.106              | 1.62 (0.739 - 3.553)  | 0.228        |
|                      |             | IFN-g Q2           | 2.814 (1.288 - 6.149) | <b>0.009</b>       | 2.786 (1.23 - 6.313)  | <b>0.014</b> |
|                      |             | IFN-g Q1           | Reference             |                    | Reference             |              |
| ASD-YesID            | vs ASD-NoID | IFN-g Q4           | 1.075 (0.582 - 1.987) | 0.817              | 1.177 (0.622 - 2.228) | 0.616        |
|                      |             | IFN-g Q3           | 0.816 (0.437 - 1.523) | 0.523              | 0.836 (0.44 - 1.587)  | 0.584        |
|                      |             | IFN-g Q2           | 1.315 (0.706 - 2.449) | 0.388              | 1.316 (0.697 - 2.483) | 0.397        |
|                      |             | IFN-g Q1           | Reference             |                    | Reference             |              |
| ASD-Reg              | vs ASD-EO   | IFN-g Q4           | 1.093 (0.535 - 2.234) | 0.806              | 1.056 (0.502 - 2.222) | 0.886        |
|                      |             | IFN-g Q3           | 1.327 (0.656 - 2.682) | 0.431              | 1.352 (0.656 - 2.786) | 0.414        |
|                      |             | IFN-g Q2           | 1.308 (0.647 - 2.642) | 0.455              | 1.241 (0.603 - 2.551) | 0.558        |
|                      |             | IFN-g Q1           | Reference             |                    | Reference             |              |
| ASD                  | vs GP       | IFN-g >10%         | 0.977 (0.589 - 1.619) | 0.927              | 0.938 (0.556 - 1.585) | 0.369        |
|                      |             | IFN-g ≤10%         | Reference             |                    | Reference             |              |
| ASD-NoID             | vs GP       | IFN-g >10%         | 0.917 (0.496 - 1.695) | 0.782              | 0.877 (0.463 - 1.662) | 0.687        |
|                      |             | IFN-g ≤10%         | Reference             |                    | Reference             |              |
| ASD-YesID            | vs GP       | IFN-g >10%         | 1.104 (0.565 - 2.156) | 0.773              | 1.053 (0.529 - 2.095) | 0.883        |



|                      |             |            | <i>Crude</i>          |                | <i>Adjusted</i>       |                |
|----------------------|-------------|------------|-----------------------|----------------|-----------------------|----------------|
| <i>Immune Marker</i> |             |            | <i>OR (95% CI)</i>    | <i>P-Value</i> | <i>OR (95% CI)</i>    | <i>P-Value</i> |
| ASD-EO               | vs GP       | IFN-g ≤10% | Reference             |                | Reference             |                |
|                      |             | IFN-g >10% | 0.976 (0.563 - 1.694) | 0.932          | 0.953 (0.537 - 1.69)  | 0.868          |
| ASD-Reg              | vs GP       | IFN-g ≤10% | Reference             |                | Reference             |                |
|                      |             | IFN-g >10% | 1.161 (0.497 - 2.716) | 0.73           | 1.062 (0.444 - 2.54)  | 0.892          |
| DD                   | vs GP       | IFN-g ≤10% | Reference             |                | Reference             |                |
|                      |             | IFN-g >10% | 0.648 (0.352 - 1.194) | 0.782          | 0.739 (0.382 - 1.429) | 0.369          |
| ASD                  | vs DD       | IFN-g ≤10% | Reference             |                | Reference             |                |
| ASD-NoID             | vs DD       | IFN-g >10% | 1.507 (0.818 - 2.774) | 0.188          | 1.269 (0.647 - 2.49)  | 0.488          |
|                      |             | IFN-g ≤10% | Reference             |                | Reference             |                |
| ASD-YesID            | vs DD       | IFN-g >10% | 1.415 (0.7 - 2.858)   | 0.334          | 1.186 (0.55 - 2.558)  | 0.664          |
|                      |             | IFN-g ≤10% | Reference             |                | Reference             |                |
| ASD-EO               | vs DD       | IFN-g >10% | 1.702 (0.802 - 3.612) | 0.166          | 1.424 (0.637 - 3.184) | 0.389          |
|                      |             | IFN-g ≤10% | Reference             |                | Reference             |                |
| ASD-Reg              | vs DD       | IFN-g >10% | 1.506 (0.787 - 2.881) | 0.216          | 1.289 (0.63 - 2.634)  | 0.487          |
|                      |             | IFN-g ≤10% | Reference             |                | Reference             |                |
| ASD-YesID            | vs ASD-NoID | IFN-g >10% | 1.792 (0.717 - 4.477) | 0.212          | 1.436 (0.547 - 3.774) | 0.462          |
|                      |             | IFN-g ≤10% | Reference             |                | Reference             |                |
| ASD-Reg              | vs ASD-EO   | IFN-g >10% | 1.203 (0.565 - 2.561) | 0.631          | 1.201 (0.552 - 2.611) | 0.644          |
|                      |             | IFN-g ≤10% | Reference             |                | Reference             |                |
| ASD                  | vs GP       | IFN-g >10% | 1.19 (0.495 - 2.86)   | 0.698          | 1.115 (0.451 - 2.752) | 0.814          |
|                      |             | IFN-g ≤10% | Reference             |                | Reference             |                |
| ASD-NoID             | vs GP       | IFN-g ≥90% | 1.086 (0.676 - 1.745) | 0.734          | 1.31 (0.734 - 2.338)  | 0.361          |
|                      |             | IFN-g <90% | Reference             |                | Reference             |                |
| ASD-YesID            | vs GP       | IFN-g ≥90% | 1.217 (0.69 - 2.147)  | 0.497          | 1.482 (0.745 - 2.948) | 0.262          |
|                      |             | IFN-g <90% | Reference             |                | Reference             |                |
| ASD-YesID            | vs GP       | IFN-g ≥90% | 1.003 (0.541 - 1.86)  | 0.992          | 1.14 (0.524 - 2.478)  | 0.741          |

|                      |             |            | <i>Crude</i>          |                | <i>Adjusted</i>       |                |
|----------------------|-------------|------------|-----------------------|----------------|-----------------------|----------------|
| <i>Immune Marker</i> |             |            | <i>OR (95% CI)</i>    | <i>P-Value</i> | <i>OR (95% CI)</i>    | <i>P-Value</i> |
| ASD-EO               | vs GP       | IFN-g <90% | Reference             |                | Reference             |                |
|                      |             | IFN-g ≥90% | 1.157 (0.695 - 1.925) | 0.575          | 1.472 (0.786 - 2.755) | 0.227          |
| ASD-Reg              | vs GP       | IFN-g <90% | Reference             |                | Reference             |                |
|                      |             | IFN-g ≥90% | 0.878 (0.394 - 1.955) | 0.75           | 1.037 (0.396 - 2.71)  | 0.942          |
|                      |             | IFN-g <90% | Reference             |                | Reference             |                |
| DD                   | vs GP       | IFN-g ≥90% | 0.943 (0.486 - 1.832) | 0.863          | 1.028 (0.439 - 2.404) | 0.95           |
|                      |             | IFN-g <90% | Reference             |                | Reference             |                |
| ASD                  | vs DD       | IFN-g ≥90% | 1.151 (0.595 - 2.227) | 0.676          | 1.275 (0.542 - 2.995) | 0.578          |
| ASD-NoID             | vs DD       | IFN-g <90% | Reference             |                | Reference             |                |
|                      |             | IFN-g ≥90% | 1.29 (0.622 - 2.677)  | 0.494          | 1.442 (0.567 - 3.665) | 0.442          |
| ASD-YesID            | vs DD       | IFN-g <90% | Reference             |                | Reference             |                |
|                      |             | IFN-g ≥90% | 1.063 (0.493 - 2.295) | 0.876          | 1.109 (0.409 - 3.004) | 0.839          |
| ASD-EO               | vs DD       | IFN-g <90% | Reference             |                | Reference             |                |
|                      |             | IFN-g ≥90% | 1.226 (0.618 - 2.434) | 0.56           | 1.432 (0.587 - 3.49)  | 0.43           |
| ASD-Reg              | vs DD       | IFN-g <90% | Reference             |                | Reference             |                |
|                      |             | IFN-g ≥90% | 0.93 (0.37 - 2.341)   | 0.878          | 1.009 (0.322 - 3.157) | 0.988          |
|                      |             | IFN-g <90% | Reference             |                | Reference             |                |
| ASD-YesID            | vs ASD-NoID | IFN-g ≥90% | 0.824 (0.414 - 1.64)  | 0.582          | 0.769 (0.325 - 1.819) | 0.55           |
|                      |             | IFN-g <90% | Reference             |                | Reference             |                |
| ASD-Reg              | vs ASD-EO   | IFN-g ≥90% | 0.759 (0.335 - 1.72)  | 0.509          | 0.704 (0.262 - 1.895) | 0.488          |
|                      |             | IFN-g <90% | Reference             |                | Reference             |                |
| ASD                  | vs GP       | IL-1B      | 1.204 (0.832 - 1.742) | 0.324          | 1.353 (0.864 - 2.12)  | 0.187          |
| ASD-NoID             | vs GP       | IL-1B      | 1.165 (0.737 - 1.842) | 0.513          | 1.426 (0.799 - 2.543) | 0.23           |
| ASD-YesID            | vs GP       | IL-1B      | 1.182 (0.735 - 1.903) | 0.49           | 1.176 (0.67 - 2.064)  | 0.572          |
| ASD-EO               | vs GP       | IL-1B      | 1.221 (0.814 - 1.831) | 0.334          | 1.348 (0.816 - 2.227) | 0.243          |
| ASD-Reg              | vs GP       | IL-1B      | 1.179 (0.652 - 2.134) | 0.585          | 1.506 (0.755 - 3.005) | 0.245          |

|                       |         |  | <i>Crude</i>          |                | <i>Adjusted</i>       |                |
|-----------------------|---------|--|-----------------------|----------------|-----------------------|----------------|
| <i>Immune Marker</i>  |         |  | <i>OR (95% CI)</i>    | <i>P-Value</i> | <i>OR (95% CI)</i>    | <i>P-Value</i> |
| DD vs GP              | IL-1B   |  | 1.019 (0.626 - 1.659) | 0.939          | 1.163 (0.616 - 2.195) | 0.641          |
| ASD vs DD             | IL-1B   |  | 1.181 (0.719 - 1.941) | 0.51           | 1.163 (0.604 - 2.239) | 0.65           |
| ASD-NoID vs DD        | IL-1B   |  | 1.143 (0.649 - 2.012) | 0.643          | 1.226 (0.579 - 2.593) | 0.595          |
| ASD-YesID vs DD       | IL-1B   |  | 1.16 (0.649 - 2.072)  | 0.616          | 1.011 (0.484 - 2.111) | 0.977          |
| ASD-EO vs DD          | IL-1B   |  | 1.198 (0.71 - 2.022)  | 0.499          | 1.159 (0.58 - 2.318)  | 0.676          |
| ASD-Reg vs DD         | IL-1B   |  | 1.157 (0.587 - 2.282) | 0.674          | 1.295 (0.56 - 2.995)  | 0.546          |
| ASD-YesID vs ASD-NoID | IL-1B   |  | 1.015 (0.582 - 1.769) | 0.958          | 0.825 (0.418 - 1.627) | 0.579          |
| ASD-Reg vs ASD-EO     | IL-1B   |  | 0.966 (0.518 - 1.8)   | 0.913          | 1.117 (0.535 - 2.33)  | 0.768          |
| ASD vs GP             | IL-2    |  | 1.259 (0.873 - 1.816) | 0.217          | 1.307 (0.812 - 2.105) | 0.27           |
| DD vs GP              | IL-2    |  | 0.901 (0.557 - 1.457) | 0.671          | 1.246 (0.654 - 2.376) | 0.504          |
| ASD-NoID vs GP        | IL-2    |  | 1.111 (0.708 - 1.742) | 0.647          | 1.094 (0.604 - 1.98)  | 0.766          |
| ASD-YesID vs GP       | IL-2    |  | 1.333 (0.829 - 2.143) | 0.235          | 1.524 (0.819 - 2.835) | 0.184          |
| ASD-EO vs GP          | IL-2    |  | 1.159 (0.779 - 1.724) | 0.467          | 1.128 (0.669 - 1.903) | 0.651          |
| ASD-Reg vs GP         | IL-2    |  | 1.606 (0.879 - 2.934) | 0.123          | 2.135 (0.986 - 4.62)  | 0.054          |
| ASD vs DD             | IL-2    |  | 1.397 (0.858 - 2.275) | 0.178          | 1.049 (0.54 - 2.037)  | 0.887          |
| ASD-NoID vs DD        | IL-2    |  | 1.233 (0.709 - 2.143) | 0.458          | 0.878 (0.414 - 1.863) | 0.734          |
| ASD-YesID vs DD       | IL-2    |  | 1.479 (0.834 - 2.625) | 0.181          | 1.223 (0.565 - 2.645) | 0.61           |
| ASD-EO vs DD          | IL-2    |  | 1.286 (0.771 - 2.144) | 0.335          | 0.905 (0.45 - 1.822)  | 0.78           |
| ASD-Reg vs DD         | IL-2    |  | 1.782 (0.9 - 3.529)   | 0.097          | 1.713 (0.699 - 4.196) | 0.239          |
| ASD-YesID vs ASD-NoID | IL-2    |  | 1.2 (0.694 - 2.074)   | 0.514          | 1.393 (0.676 - 2.869) | 0.369          |
| ASD-Reg vs ASD-EO     | IL-2    |  | 1.386 (0.741 - 2.592) | 0.307          | 1.892 (0.842 - 4.25)  | 0.122          |
| ASD vs GP             | IL-4 Q4 |  | 1.085 (0.724 - 1.626) | 0.694          | 1.104 (0.728 - 1.672) | 0.642          |
|                       | IL-4 Q3 |  | 1.031 (0.687 - 1.548) | 0.883          | 0.985 (0.648 - 1.496) | 0.944          |
|                       | IL-4 Q2 |  | 0.774 (0.511 - 1.171) | 0.224          | 0.726 (0.475 - 1.109) | 0.138          |

|                      |         | <b>Crude</b>          |                | <b>Adjusted</b>       |                |
|----------------------|---------|-----------------------|----------------|-----------------------|----------------|
| <b>Immune Marker</b> |         | <b>OR (95% CI)</b>    | <b>P-Value</b> | <b>OR (95% CI)</b>    | <b>P-Value</b> |
|                      | IL-4 Q1 | Reference             |                | Reference             |                |
| ASD-NoID vs GP       | IL-4 Q4 | 1.129 (0.682 - 1.869) | 0.637          | 1.114 (0.664 - 1.869) | 0.683          |
|                      | IL-4 Q3 | 1.163 (0.705 - 1.917) | 0.555          | 1.101 (0.657 - 1.846) | 0.714          |
|                      | IL-4 Q2 | 0.806 (0.478 - 1.36)  | 0.419          | 0.745 (0.436 - 1.274) | 0.282          |
| ASD-YesID vs GP      | IL-4 Q1 | Reference             |                | Reference             |                |
|                      | IL-4 Q4 | 0.945 (0.565 - 1.581) | 0.83           | 0.98 (0.579 - 1.658)  | 0.939          |
|                      | IL-4 Q3 | 0.957 (0.574 - 1.598) | 0.868          | 0.922 (0.545 - 1.56)  | 0.763          |
|                      | IL-4 Q2 | 0.725 (0.427 - 1.231) | 0.234          | 0.699 (0.408 - 1.196) | 0.191          |
| ASD-EO vs GP         | IL-4 Q1 | Reference             |                | Reference             |                |
|                      | IL-4 Q4 | 1.132 (0.729 - 1.757) | 0.582          | 1.169 (0.744 - 1.838) | 0.498          |
|                      | IL-4 Q3 | 1.002 (0.641 - 1.565) | 0.994          | 0.975 (0.616 - 1.545) | 0.916          |
| ASD-Reg vs GP        | IL-4 Q2 | 0.823 (0.524 - 1.292) | 0.396          | 0.768 (0.483 - 1.222) | 0.265          |
|                      | IL-4 Q1 | Reference             |                | Reference             |                |
|                      | IL-4 Q4 | 0.887 (0.464 - 1.694) | 0.717          | 0.84 (0.433 - 1.631)  | 0.607          |
|                      | IL-4 Q3 | 1.197 (0.651 - 2.202) | 0.564          | 1.044 (0.557 - 1.958) | 0.893          |
| DD vs GP             | IL-4 Q2 | 0.594 (0.297 - 1.188) | 0.141          | 0.529 (0.261 - 1.073) | 0.077          |
|                      | IL-4 Q1 | Reference             |                | Reference             |                |
|                      | IL-4 Q4 | 0.968 (0.561 - 1.67)  | 0.906          | 0.892 (0.498 - 1.6)   | 0.702          |
|                      | IL-4 Q3 | 0.878 (0.504 - 1.527) | 0.644          | 0.843 (0.468 - 1.519) | 0.569          |
| ASD vs DD            | IL-4 Q2 | 0.866 (0.502 - 1.494) | 0.606          | 0.822 (0.461 - 1.463) | 0.504          |
|                      | IL-4 Q1 | Reference             |                | Reference             |                |
|                      | IL-4 Q4 | 1.121 (0.652 - 1.926) | 0.68           | 1.237 (0.687 - 2.227) | 0.479          |
|                      | IL-4 Q3 | 1.175 (0.677 - 2.04)  | 0.567          | 1.169 (0.645 - 2.118) | 0.607          |
| ASD-NoID vs DD       | IL-4 Q2 | 0.893 (0.513 - 1.554) | 0.689          | 0.883 (0.487 - 1.604) | 0.684          |
|                      | IL-4 Q1 | Reference             |                | Reference             |                |
|                      | IL-4 Q4 | 1.167 (0.628 - 2.167) | 0.626          | 1.248 (0.642 - 2.427) | 0.514          |

|           |             | <b>Crude</b>         |                       | <b>Adjusted</b>    |                       |       |
|-----------|-------------|----------------------|-----------------------|--------------------|-----------------------|-------|
|           |             | <b>OR (95% CI)</b>   | <b>P-Value</b>        | <b>OR (95% CI)</b> | <b>P-Value</b>        |       |
|           |             | <b>Immune Marker</b> |                       |                    |                       |       |
| ASD-YesID | vs DD       | IL-4 Q3              | 1.325 (0.709 - 2.473) | 0.377              | 1.307 (0.67 - 2.549)  | 0.432 |
|           |             | IL-4 Q2              | 0.931 (0.491 - 1.764) | 0.826              | 0.907 (0.459 - 1.793) | 0.779 |
|           |             | IL-4 Q1              | Reference             |                    | Reference             |       |
|           |             | IL-4 Q4              | 0.977 (0.521 - 1.83)  | 0.941              | 1.098 (0.563 - 2.143) | 0.784 |
|           |             | IL-4 Q3              | 1.091 (0.579 - 2.056) | 0.788              | 1.095 (0.558 - 2.146) | 0.793 |
| ASD-EO    | vs DD       | IL-4 Q2              | 0.837 (0.439 - 1.595) | 0.589              | 0.85 (0.431 - 1.679)  | 0.64  |
|           |             | IL-4 Q1              | Reference             |                    | Reference             |       |
|           |             | IL-4 Q4              | 1.169 (0.662 - 2.064) | 0.59               | 1.31 (0.707 - 2.427)  | 0.39  |
|           |             | IL-4 Q3              | 1.141 (0.638 - 2.042) | 0.656              | 1.157 (0.619 - 2.164) | 0.647 |
|           |             | IL-4 Q2              | 0.949 (0.53 - 1.7)    | 0.862              | 0.935 (0.499 - 1.751) | 0.834 |
| ASD-Reg   | vs DD       | IL-4 Q1              | Reference             |                    | Reference             |       |
|           |             | IL-4 Q4              | 0.917 (0.437 - 1.922) | 0.818              | 0.941 (0.432 - 2.053) | 0.879 |
|           |             | IL-4 Q3              | 1.364 (0.667 - 2.788) | 0.395              | 1.239 (0.582 - 2.637) | 0.579 |
|           |             | IL-4 Q2              | 0.686 (0.313 - 1.504) | 0.346              | 0.644 (0.284 - 1.46)  | 0.292 |
|           |             | IL-4 Q1              | Reference             |                    | Reference             |       |
| ASD-YesID | vs ASD-NoID | IL-4 Q4              | 0.837 (0.463 - 1.514) | 0.556              | 0.88 (0.481 - 1.61)   | 0.678 |
|           |             | IL-4 Q3              | 0.824 (0.458 - 1.482) | 0.517              | 0.837 (0.458 - 1.531) | 0.565 |
|           |             | IL-4 Q2              | 0.9 (0.481 - 1.682)   | 0.74               | 0.938 (0.496 - 1.773) | 0.843 |
|           |             | IL-4 Q1              | Reference             |                    | Reference             |       |
| ASD-Reg   | vs ASD-EO   | IL-4 Q4              | 0.784 (0.403 - 1.527) | 0.474              | 0.718 (0.362 - 1.425) | 0.344 |
|           |             | IL-4 Q3              | 1.195 (0.633 - 2.256) | 0.583              | 1.07 (0.555 - 2.063)  | 0.84  |
|           |             | IL-4 Q2              | 0.722 (0.35 - 1.489)  | 0.378              | 0.689 (0.329 - 1.442) | 0.323 |
|           |             | IL-4 Q1              | Reference             |                    | Reference             |       |
| ASD       | vs GP       | IL-4 >10%            | 0.918 (0.565 - 1.493) | 0.731              | 0.945 (0.574 - 1.556) | 0.376 |
|           |             | IL-4 ≤10%            | Reference             |                    | Reference             |       |
| ASD-NoID  | vs GP       | IL-4 >10%            | 1.046 (0.563 - 1.944) | 0.887              | 1.096 (0.58 - 2.071)  | 0.778 |
|           |             | IL-4 ≤10%            | Reference             |                    | Reference             |       |
| ASD-YesID | vs GP       | IL-4 >10%            | 0.773 (0.428 - 1.397) | 0.394              | 0.785 (0.429 - 1.437) | 0.432 |

|           |             | <i>Crude</i>         |                       | <i>Adjusted</i>    |                       |
|-----------|-------------|----------------------|-----------------------|--------------------|-----------------------|
|           |             | <i>OR (95% CI)</i>   | <i>P-Value</i>        | <i>OR (95% CI)</i> | <i>P-Value</i>        |
|           |             | <i>Immune Marker</i> |                       |                    |                       |
| ASD-EO    | vs GP       | IL-4 ≤10%            | Reference             |                    | Reference             |
|           |             | IL-4 >10%            | 0.915 (0.539 - 1.551) | 0.74               | 0.958 (0.557 - 1.649) |
| ASD-Reg   | vs GP       | IL-4 ≤10%            | Reference             |                    | Reference             |
|           |             | IL-4 >10%            | 0.941 (0.435 - 2.034) | 0.877              | 0.888 (0.404 - 1.952) |
| DD        | vs GP       | IL-4 ≤10%            | Reference             |                    | Reference             |
|           |             | IL-4 >10%            | 0.918 (0.478 - 1.764) | 0.887              | 0.733 (0.368 - 1.459) |
| ASD       | vs DD       | IL-4 ≤10%            | Reference             |                    | Reference             |
|           |             | IL-4 >10%            | 1 (0.523 - 1.912)     | 1                  | 1.29 (0.645 - 2.579)  |
| ASD-NoID  | vs DD       | IL-4 ≤10%            | Reference             |                    | Reference             |
|           |             | IL-4 >10%            | 1.139 (0.536 - 2.42)  | 0.735              | 1.495 (0.672 - 3.327) |
| ASD-YesID | vs DD       | IL-4 ≤10%            | Reference             |                    | Reference             |
|           |             | IL-4 >10%            | 0.842 (0.406 - 1.748) | 0.645              | 1.071 (0.496 - 2.314) |
| ASD-EO    | vs DD       | IL-4 ≤10%            | Reference             |                    | Reference             |
|           |             | IL-4 >10%            | 0.996 (0.504 - 1.967) | 0.991              | 1.307 (0.631 - 2.707) |
| ASD-Reg   | vs DD       | IL-4 ≤10%            | Reference             |                    | Reference             |
|           |             | IL-4 >10%            | 1.025 (0.424 - 2.475) | 0.957              | 1.212 (0.484 - 3.036) |
| ASD-YesID | vs ASD-NoID | IL-4 ≤10%            | Reference             |                    | Reference             |
|           |             | IL-4 >10%            | 0.739 (0.367 - 1.492) | 0.399              | 0.716 (0.349 - 1.468) |
| ASD-Reg   | vs ASD-EO   | IL-4 ≤10%            | Reference             |                    | Reference             |
|           |             | IL-4 >10%            | 1.029 (0.465 - 2.277) | 0.944              | 0.927 (0.41 - 2.095)  |
| ASD       | vs GP       | IL-4 ≤10%            | Reference             |                    | Reference             |
|           |             | IL-4 ≥90%            | 1.385 (0.853 - 2.247) | 0.188              | 1.602 (0.944 - 2.718) |
| ASD-NoID  | vs GP       | IL-4 <90%            | Reference             |                    | Reference             |
|           |             | IL-4 ≥90%            | 1.352 (0.75 - 2.436)  | 0.316              | 1.417 (0.738 - 2.72)  |
| ASD-YesID | vs GP       | IL-4 <90%            | Reference             |                    | Reference             |
|           |             | IL-4 ≥90%            | 1.599 (0.892 - 2.868) | 0.115              | 2.2 (1.155 - 4.191)   |

|                      |             |           | <i>Crude</i>          |                | <i>Adjusted</i>       |                |
|----------------------|-------------|-----------|-----------------------|----------------|-----------------------|----------------|
| <i>Immune Marker</i> |             |           | <i>OR (95% CI)</i>    | <i>P-Value</i> | <i>OR (95% CI)</i>    | <i>P-Value</i> |
| ASD-EO               | vs GP       | IL-4 <90% | Reference             |                | Reference             |                |
|                      |             | IL-4 ≥90% | 1.46 (0.87 - 2.449)   | 0.152          | 1.72 (0.971 - 3.045)  | 0.063          |
| ASD-Reg              | vs GP       | IL-4 <90% | Reference             |                | Reference             |                |
|                      |             | IL-4 ≥90% | 1.172 (0.539 - 2.551) | 0.688          | 1.316 (0.563 - 3.077) | 0.526          |
| DD                   | vs GP       | IL-4 <90% | Reference             |                | Reference             |                |
|                      |             | IL-4 ≥90% | 1.494 (0.801 - 2.787) | 0.206          | 1.506 (0.744 - 3.05)  | 0.255          |
| ASD                  | vs DD       | IL-4 <90% | Reference             |                | Reference             |                |
| ASD-NoID             | vs DD       | IL-4 ≥90% | 0.926 (0.508 - 1.689) | 0.803          | 1.064 (0.531 - 2.13)  | 0.862          |
|                      |             | IL-4 <90% | Reference             |                | Reference             |                |
| ASD-YesID            | vs DD       | IL-4 ≥90% | 0.904 (0.455 - 1.799) | 0.775          | 0.941 (0.425 - 2.082) | 0.88           |
|                      |             | IL-4 <90% | Reference             |                | Reference             |                |
| ASD-EO               | vs DD       | IL-4 ≥90% | 1.07 (0.54 - 2.119)   | 0.846          | 1.461 (0.668 - 3.196) | 0.343          |
|                      |             | IL-4 <90% | Reference             |                | Reference             |                |
| ASD-Reg              | vs DD       | IL-4 ≥90% | 0.977 (0.522 - 1.829) | 0.942          | 1.142 (0.549 - 2.374) | 0.722          |
|                      |             | IL-4 <90% | Reference             |                | Reference             |                |
| ASD-YesID            | vs ASD-NoID | IL-4 ≥90% | 0.785 (0.334 - 1.844) | 0.578          | 0.874 (0.337 - 2.264) | 0.781          |
|                      |             | IL-4 <90% | Reference             |                | Reference             |                |
| ASD-Reg              | vs ASD-EO   | IL-4 ≥90% | 1.183 (0.616 - 2.272) | 0.614          | 1.553 (0.745 - 3.237) | 0.24           |
|                      |             | IL-4 <90% | Reference             |                | Reference             |                |
| ASD                  | vs GP       | IL-6      | 1.361 (0.97 - 1.91)   | 0.075          | 1.484 (1.01 - 2.18)   | <b>0.044</b>   |
| ASD-NoID             | vs GP       | IL-6      | 1.173 (0.773 - 1.782) | 0.453          | 1.406 (0.869 - 2.277) | 0.165          |
| ASD-YesID            | vs GP       | IL-6      | 1.483 (0.961 - 2.288) | 0.075          | 1.51 (0.928 - 2.456)  | 0.097          |
| ASD-EO               | vs GP       | IL-6      | 1.319 (0.911 - 1.909) | 0.142          | 1.425 (0.936 - 2.171) | 0.099          |
| ASD-Reg              | vs GP       | IL-6      | 1.515 (0.886 - 2.592) | 0.129          | 1.763 (0.968 - 3.212) | 0.064          |

|                      |             |       | <i>Crude</i>          |                | <i>Adjusted</i>       |                |
|----------------------|-------------|-------|-----------------------|----------------|-----------------------|----------------|
|                      |             |       | <i>OR (95% CI)</i>    | <i>P-Value</i> | <i>OR (95% CI)</i>    | <i>P-Value</i> |
| <i>Immune Marker</i> |             |       |                       |                |                       |                |
| DD                   | vs GP       | IL-6  | 0.931 (0.597 - 1.45)  | 0.751          | 1.308 (0.766 - 2.234) | 0.325          |
| ASD                  | vs DD       | IL-6  | 1.462 (0.931 - 2.297) | 0.099          | 1.134 (0.654 - 1.968) | 0.654          |
| ASD-NoID             | vs DD       | IL-6  | 1.261 (0.755 - 2.106) | 0.376          | 1.075 (0.577 - 2.004) | 0.82           |
| ASD-YesID            | vs DD       | IL-6  | 1.593 (0.941 - 2.698) | 0.083          | 1.154 (0.617 - 2.157) | 0.654          |
| ASD-EO               | vs DD       | IL-6  | 1.417 (0.881 - 2.279) | 0.15           | 1.089 (0.611 - 1.942) | 0.771          |
| ASD-Reg              | vs DD       | IL-6  | 1.628 (0.881 - 3.01)  | 0.12           | 1.348 (0.659 - 2.757) | 0.414          |
| ASD-YesID            | vs ASD-NoID | IL-6  | 1.264 (0.766 - 2.085) | 0.36           | 1.073 (0.607 - 1.898) | 0.807          |
| ASD-Reg              | vs ASD-EO   | IL-6  | 1.149 (0.658 - 2.006) | 0.625          | 1.237 (0.662 - 2.311) | 0.505          |
| ASD                  | vs GP       | IL-8  | 1.416 (1.074 - 1.867) | <b>0.014</b>   | 1.758 (1.268 - 2.438) | <b>0.001</b>   |
| ASD-NoID             | vs GP       | IL-8  | 1.152 (0.816 - 1.628) | 0.421          | 1.607 (1.067 - 2.42)  | <b>0.023</b>   |
| ASD-YesID            | vs GP       | IL-8  | 1.673 (1.188 - 2.355) | <b>0.003</b>   | 1.868 (1.24 - 2.813)  | <b>0.003</b>   |
| ASD-EO               | vs GP       | IL-8  | 1.529 (1.135 - 2.059) | <b>0.005</b>   | 1.986 (1.395 - 2.827) | <b>0.0001</b>  |
| ASD-Reg              | vs GP       | IL-8  | 1.133 (0.727 - 1.765) | 0.581          | 1.324 (0.782 - 2.241) | 0.296          |
| DD                   | vs GP       | IL-8  | 1.313 (0.906 - 1.904) | 0.15           | 1.486 (0.955 - 2.311) | 0.079          |
| ASD                  | vs DD       | IL-8  | 1.078 (0.748 - 1.554) | 0.687          | 1.184 (0.763 - 1.836) | 0.452          |
| ASD-NoID             | vs DD       | IL-8  | 0.877 (0.576 - 1.337) | 0.543          | 1.082 (0.654 - 1.791) | 0.76           |
| ASD-YesID            | vs DD       | IL-8  | 1.273 (0.839 - 1.932) | 0.256          | 1.257 (0.761 - 2.078) | 0.372          |
| ASD-EO               | vs DD       | IL-8  | 1.164 (0.795 - 1.705) | 0.436          | 1.337 (0.845 - 2.116) | 0.215          |
| ASD-Reg              | vs DD       | IL-8  | 0.863 (0.521 - 1.429) | 0.566          | 0.891 (0.489 - 1.626) | 0.707          |
| ASD-YesID            | vs ASD-NoID | IL-8  | 1.451 (0.978 - 2.155) | 0.065          | 1.162 (0.726 - 1.859) | 0.531          |
| ASD-Reg              | vs ASD-EO   | IL-8  | 0.741 (0.471 - 1.166) | 0.195          | 0.667 (0.39 - 1.141)  | 0.139          |
| ASD                  | vs GP       | IL-10 | 1.431 (0.892 - 2.296) | 0.138          | 1.613 (0.898 - 2.896) | 0.109          |
| ASD-NoID             | vs GP       | IL-10 | 1.669 (0.928 - 3.003) | 0.087          | 1.608 (0.77 - 3.356)  | 0.206          |
| ASD-YesID            | vs GP       | IL-10 | 1.232 (0.673 - 2.256) | 0.498          | 1.684 (0.796 - 3.563) | 0.173          |



|                      |             |       | <i>Crude</i>          |                | <i>Adjusted</i>       |                |
|----------------------|-------------|-------|-----------------------|----------------|-----------------------|----------------|
| <i>Immune Marker</i> |             |       | <i>OR (95% CI)</i>    | <i>P-Value</i> | <i>OR (95% CI)</i>    | <i>P-Value</i> |
| ASD-EO               | vs GP       | IL-10 | 1.288 (0.769 - 2.155) | 0.336          | 1.386 (0.73 - 2.634)  | 0.319          |
| ASD-Reg              | vs GP       | IL-10 | 1.856 (0.873 - 3.948) | 0.108          | 2.72 (1.056 - 7.004)  | <b>0.038</b>   |
| DD                   | vs GP       | IL-10 | 1.173 (0.62 - 2.219)  | 0.624          | 1.587 (0.718 - 3.507) | 0.254          |
| ASD                  | vs DD       | IL-10 | 1.22 (0.642 - 2.317)  | 0.543          | 1.016 (0.45 - 2.293)  | 0.969          |
| ASD-NoID             | vs DD       | IL-10 | 1.423 (0.686 - 2.952) | 0.343          | 1.013 (0.4 - 2.565)   | 0.978          |
| ASD-YesID            | vs DD       | IL-10 | 1.051 (0.499 - 2.212) | 0.896          | 1.061 (0.416 - 2.706) | 0.901          |
| ASD-EO               | vs DD       | IL-10 | 1.098 (0.56 - 2.152)  | 0.786          | 0.873 (0.37 - 2.06)   | 0.757          |
| ASD-Reg              | vs DD       | IL-10 | 1.583 (0.663 - 3.777) | 0.301          | 1.714 (0.572 - 5.132) | 0.336          |
| ASD-YesID            | vs ASD-NoID | IL-10 | 0.738 (0.366 - 1.487) | 0.396          | 1.047 (0.434 - 2.529) | 0.918          |
| ASD-Reg              | vs ASD-EO   | IL-10 | 1.442 (0.658 - 3.156) | 0.36           | 1.962 (0.729 - 5.283) | 0.182          |
| ASD                  | vs GP       | IL-16 | 1.094 (0.771 - 1.552) | 0.614          | 1.085 (0.699 - 1.684) | 0.717          |
| ASD-NoID             | vs GP       | IL-16 | 1.049 (0.681 - 1.615) | 0.829          | 1.119 (0.645 - 1.944) | 0.689          |
| ASD-YesID            | vs GP       | IL-16 | 1.044 (0.668 - 1.632) | 0.849          | 0.985 (0.564 - 1.72)  | 0.957          |
| ASD-EO               | vs GP       | IL-16 | 1.015 (0.696 - 1.481) | 0.937          | 1.003 (0.621 - 1.622) | 0.99           |
| ASD-Reg              | vs GP       | IL-16 | 1.256 (0.707 - 2.233) | 0.437          | 1.279 (0.62 - 2.641)  | 0.506          |
| DD                   | vs GP       | IL-16 | 0.681 (0.441 - 1.05)  | 0.082          | 0.654 (0.364 - 1.175) | 0.156          |
| ASD                  | vs DD       | IL-16 | 1.608 (1.036 - 2.494) | <b>0.034</b>   | 1.657 (0.91 - 3.019)  | 0.099          |
| ASD-NoID             | vs DD       | IL-16 | 1.541 (0.929 - 2.557) | 0.094          | 1.71 (0.86 - 3.4)     | 0.126          |
| ASD-YesID            | vs DD       | IL-16 | 1.535 (0.913 - 2.579) | 0.106          | 1.505 (0.756 - 2.995) | 0.245          |
| ASD-EO               | vs DD       | IL-16 | 1.492 (0.94 - 2.366)  | 0.089          | 1.533 (0.814 - 2.885) | 0.186          |
| ASD-Reg              | vs DD       | IL-16 | 1.846 (0.979 - 3.481) | 0.058          | 1.955 (0.854 - 4.473) | 0.112          |
| ASD-YesID            | vs ASD-NoID | IL-16 | 0.996 (0.594 - 1.67)  | 0.988          | 0.88 (0.457 - 1.695)  | 0.702          |
| ASD-Reg              | vs ASD-EO   | IL-16 | 1.238 (0.682 - 2.246) | 0.483          | 1.275 (0.598 - 2.718) | 0.529          |

|                      |             |       | <i>Crude</i>          |                | <i>Adjusted</i>       |                |
|----------------------|-------------|-------|-----------------------|----------------|-----------------------|----------------|
|                      |             |       | <i>OR (95% CI)</i>    | <i>P-Value</i> | <i>OR (95% CI)</i>    | <i>P-Value</i> |
| <i>Immune Marker</i> |             |       |                       |                |                       |                |
| ASD                  | vs GP       | IP-10 | 0.981 (0.628 - 1.534) | 0.934          | 1.072 (0.633 - 1.813) | 0.797          |
| ASD-NoID             | vs GP       | IP-10 | 1.025 (0.59 - 1.781)  | 0.93           | 1.101 (0.569 - 2.13)  | 0.776          |
| ASD-YesID            | vs GP       | IP-10 | 0.861 (0.484 - 1.532) | 0.61           | 1.014 (0.513 - 2.002) | 0.969          |
| ASD-EO               | vs GP       | IP-10 | 0.862 (0.528 - 1.407) | 0.552          | 0.949 (0.531 - 1.694) | 0.859          |
| ASD-Reg              | vs GP       | IP-10 | 1.22 (0.605 - 2.459)  | 0.579          | 1.35 (0.582 - 3.134)  | 0.485          |
| DD                   | vs GP       | IP-10 | 1.138 (0.625 - 2.074) | 0.672          | 0.969 (0.487 - 1.928) | 0.929          |
| ASD                  | vs DD       | IP-10 | 0.862 (0.472 - 1.574) | 0.629          | 1.106 (0.544 - 2.248) | 0.781          |
| ASD-NoID             | vs DD       | IP-10 | 0.901 (0.454 - 1.785) | 0.764          | 1.136 (0.502 - 2.568) | 0.76           |
| ASD-YesID            | vs DD       | IP-10 | 0.756 (0.374 - 1.529) | 0.437          | 1.046 (0.457 - 2.392) | 0.915          |
| ASD-EO               | vs DD       | IP-10 | 0.757 (0.401 - 1.429) | 0.39           | 0.979 (0.461 - 2.077) | 0.956          |
| ASD-Reg              | vs DD       | IP-10 | 1.071 (0.477 - 2.406) | 0.867          | 1.393 (0.531 - 3.654) | 0.5            |
| ASD-YesID            | vs ASD-NoID | IP-10 | 0.84 (0.433 - 1.63)   | 0.606          | 0.921 (0.415 - 2.046) | 0.84           |
| ASD-Reg              | vs ASD-EO   | IP-10 | 1.415 (0.681 - 2.941) | 0.352          | 1.423 (0.587 - 3.453) | 0.435          |
| ASD                  | vs GP       | I-TAC | 0.892 (0.662 - 1.203) | 0.455          | 0.826 (0.554 - 1.234) | 0.351          |
| ASD-NoID             | vs GP       | I-TAC | 0.986 (0.681 - 1.427) | 0.939          | 0.836 (0.505 - 1.383) | 0.485          |
| ASD-YesID            | vs GP       | I-TAC | 0.766 (0.522 - 1.123) | 0.172          | 0.842 (0.502 - 1.413) | 0.515          |
| ASD-EO               | vs GP       | I-TAC | 0.854 (0.616 - 1.183) | 0.342          | 0.843 (0.542 - 1.31)  | 0.447          |
| ASD-Reg              | vs GP       | I-TAC | 1.04 (0.647 - 1.672)  | 0.872          | 0.832 (0.437 - 1.586) | 0.577          |
| DD                   | vs GP       | I-TAC | 1.092 (0.729 - 1.636) | 0.67           | 0.896 (0.524 - 1.531) | 0.688          |
| ASD                  | vs DD       | I-TAC | 0.817 (0.545 - 1.226) | 0.329          | 0.922 (0.532 - 1.599) | 0.773          |
| ASD-NoID             | vs DD       | I-TAC | 0.903 (0.57 - 1.431)  | 0.663          | 0.933 (0.497 - 1.751) | 0.829          |
| ASD-YesID            | vs DD       | I-TAC | 0.701 (0.438 - 1.124) | 0.14           | 0.94 (0.496 - 1.781)  | 0.85           |

|                      |             |       | <i>Crude</i>          |                | <i>Adjusted</i>       |                |
|----------------------|-------------|-------|-----------------------|----------------|-----------------------|----------------|
| <i>Immune Marker</i> |             |       | <i>OR (95% CI)</i>    | <i>P-Value</i> | <i>OR (95% CI)</i>    | <i>P-Value</i> |
| ASD-EO               | vs DD       | I-TAC | 0.782 (0.511 - 1.197) | 0.258          | 0.941 (0.526 - 1.684) | 0.837          |
| ASD-Reg              | vs DD       | I-TAC | 0.952 (0.55 - 1.648)  | 0.862          | 0.929 (0.442 - 1.954) | 0.846          |
| ASD-YesID            | vs ASD-NoID | I-TAC | 0.777 (0.499 - 1.208) | 0.263          | 1.008 (0.549 - 1.85)  | 0.98           |
| ASD-Reg              | vs ASD-EO   | I-TAC | 1.218 (0.744 - 1.995) | 0.433          | 0.988 (0.502 - 1.943) | 0.971          |
| ASD                  | vs GP       | MCP-1 | 1.099 (0.795 - 1.519) | 0.569          | 1.133 (0.789 - 1.627) | 0.498          |
| ASD-NoID             | vs GP       | MCP-1 | 1.035 (0.693 - 1.546) | 0.868          | 1.076 (0.679 - 1.703) | 0.756          |
| ASD-YesID            | vs GP       | MCP-1 | 1.037 (0.684 - 1.571) | 0.865          | 1.055 (0.666 - 1.67)  | 0.82           |
| ASD-EO               | vs GP       | MCP-1 | 1.091 (0.766 - 1.553) | 0.63           | 1.123 (0.754 - 1.673) | 0.568          |
| ASD-Reg              | vs GP       | MCP-1 | 1.02 (0.609 - 1.708)  | 0.94           | 1.093 (0.614 - 1.947) | 0.762          |
| DD                   | vs GP       | MCP-1 | 0.845 (0.545 - 1.31)  | 0.451          | 1.12 (0.681 - 1.839)  | 0.656          |
| ASD                  | vs DD       | MCP-1 | 1.301 (0.838 - 2.02)  | 0.242          | 1.012 (0.61 - 1.679)  | 0.962          |
| ASD-NoID             | vs DD       | MCP-1 | 1.225 (0.743 - 2.018) | 0.426          | 0.961 (0.537 - 1.717) | 0.893          |
| ASD-YesID            | vs DD       | MCP-1 | 1.227 (0.736 - 2.045) | 0.432          | 0.942 (0.528 - 1.68)  | 0.84           |
| ASD-EO               | vs DD       | MCP-1 | 1.291 (0.813 - 2.05)  | 0.278          | 1.003 (0.588 - 1.712) | 0.99           |
| ASD-Reg              | vs DD       | MCP-1 | 1.208 (0.666 - 2.189) | 0.534          | 0.977 (0.497 - 1.917) | 0.945          |
| ASD-YesID            | vs ASD-NoID | MCP-1 | 1.002 (0.621 - 1.618) | 0.993          | 0.98 (0.569 - 1.691)  | 0.943          |
| ASD-Reg              | vs ASD-EO   | MCP-1 | 0.935 (0.548 - 1.597) | 0.806          | 0.973 (0.532 - 1.782) | 0.93           |
| ASD                  | vs GP       | MCP-2 | 1.031 (0.646 - 1.647) | 0.898          | 1.028 (0.57 - 1.854)  | 0.926          |
| ASD-NoID             | vs GP       | MCP-2 | 1.345 (0.749 - 2.414) | 0.321          | 1.52 (0.722 - 3.197)  | 0.27           |
| ASD-YesID            | vs GP       | MCP-2 | 0.798 (0.442 - 1.441) | 0.454          | 0.687 (0.325 - 1.45)  | 0.325          |
| ASD-EO               | vs GP       | MCP-2 | 1.018 (0.611 - 1.696) | 0.945          | 0.995 (0.52 - 1.903)  | 0.988          |
| ASD-Reg              | vs GP       | MCP-2 | 1.03 (0.489 - 2.168)  | 0.939          | 1.224 (0.467 - 3.21)  | 0.68           |
| DD                   | vs GP       | MCP-2 | 1.081 (0.573 - 2.04)  | 0.81           | 1.164 (0.524 - 2.59)  | 0.709          |

|                      |             |          | <i>Crude</i>          |                | <i>Adjusted</i>       |                |
|----------------------|-------------|----------|-----------------------|----------------|-----------------------|----------------|
| <i>Immune Marker</i> |             |          | <i>OR (95% CI)</i>    | <i>P-Value</i> | <i>OR (95% CI)</i>    | <i>P-Value</i> |
| ASD                  | vs DD       | MCP-2    | 0.954 (0.504 - 1.803) | 0.884          | 0.883 (0.388 - 2.008) | 0.767          |
| ASD-NoID             | vs DD       | MCP-2    | 1.244 (0.601 - 2.574) | 0.556          | 1.305 (0.509 - 3.347) | 0.579          |
| ASD-YesID            | vs DD       | MCP-2    | 0.738 (0.355 - 1.536) | 0.417          | 0.59 (0.232 - 1.5)    | 0.268          |
| ASD-EO               | vs DD       | MCP-2    | 0.942 (0.482 - 1.838) | 0.86           | 0.854 (0.359 - 2.033) | 0.722          |
| ASD-Reg              | vs DD       | MCP-2    | 0.953 (0.403 - 2.253) | 0.912          | 1.052 (0.344 - 3.211) | 0.93           |
| ASD-YesID            | vs ASD-NoID | MCP-2    | 0.593 (0.297 - 1.183) | 0.138          | 0.452 (0.186 - 1.098) | 0.079          |
| ASD-Reg              | vs ASD-EO   | MCP-2    | 1.011 (0.467 - 2.192) | 0.977          | 1.231 (0.448 - 3.382) | 0.687          |
| ASD                  | vs GP       | MCP-3    | 1.448 (0.935 - 2.242) | 0.098          | 1.598 (0.93 - 2.745)  | 0.09           |
| ASD-NoID             | vs GP       | MCP-3    | 1.318 (0.767 - 2.264) | 0.317          | 1.402 (0.716 - 2.745) | 0.325          |
| ASD-YesID            | vs GP       | MCP-3    | 1.455 (0.828 - 2.556) | 0.192          | 1.829 (0.904 - 3.7)   | 0.093          |
| ASD-EO               | vs GP       | MCP-3    | 1.248 (0.777 - 2.006) | 0.36           | 1.326 (0.735 - 2.395) | 0.349          |
| ASD-Reg              | vs GP       | MCP-3    | 2.036 (0.996 - 4.161) | 0.051          | 2.806 (1.15 - 6.845)  | <b>0.023</b>   |
| DD                   | vs GP       | MCP-3    | 1.058 (0.59 - 1.895)  | 0.851          | 1.463 (0.699 - 3.06)  | 0.313          |
| ASD                  | vs DD       | MCP-3    | 1.369 (0.758 - 2.471) | 0.298          | 1.092 (0.511 - 2.333) | 0.82           |
| ASD-NoID             | vs DD       | MCP-3    | 1.246 (0.637 - 2.438) | 0.52           | 0.958 (0.406 - 2.261) | 0.922          |
| ASD-YesID            | vs DD       | MCP-3    | 1.376 (0.69 - 2.74)   | 0.365          | 1.25 (0.518 - 3.015)  | 0.619          |
| ASD-EO               | vs DD       | MCP-3    | 1.18 (0.636 - 2.19)   | 0.6            | 0.907 (0.408 - 2.014) | 0.81           |
| ASD-Reg              | vs DD       | MCP-3    | 1.925 (0.85 - 4.359)  | 0.116          | 1.919 (0.683 - 5.388) | 0.216          |
| ASD-YesID            | vs ASD-NoID | MCP-3    | 1.104 (0.574 - 2.121) | 0.767          | 1.305 (0.575 - 2.958) | 0.524          |
| ASD-Reg              | vs ASD-EO   | MCP-3    | 1.631 (0.776 - 3.427) | 0.197          | 2.116 (0.834 - 5.367) | 0.115          |
| ASD                  | vs GP       | MCP-4 Q4 | 0.882 (0.587 - 1.327) | 0.548          | 0.883 (0.57 - 1.368)  | 0.578          |
|                      |             | MCP-4 Q3 | 0.959 (0.638 - 1.442) | 0.841          | 0.952 (0.625 - 1.45)  | 0.817          |
|                      |             | MCP-4 Q2 | 1.09 (0.722 - 1.644)  | 0.682          | 1.08 (0.709 - 1.647)  | 0.72           |
|                      |             | MCP-4 Q1 | Reference             |                | Reference             |                |

|                 |  | <b>Crude</b>         |                       | <b>Adjusted</b>    |                       |       |
|-----------------|--|----------------------|-----------------------|--------------------|-----------------------|-------|
|                 |  | <b>OR (95% CI)</b>   | <b>P-Value</b>        | <b>OR (95% CI)</b> | <b>P-Value</b>        |       |
|                 |  | <b>Immune Marker</b> |                       |                    |                       |       |
| ASD-NoID vs GP  |  | MCP-4 Q4             | 0.954 (0.577 - 1.575) | 0.853              | 0.921 (0.537 - 1.578) | 0.764 |
|                 |  | MCP-4 Q3             | 1.056 (0.641 - 1.738) | 0.83               | 1.01 (0.603 - 1.692)  | 0.969 |
|                 |  | MCP-4 Q2             | 0.93 (0.552 - 1.567)  | 0.786              | 0.907 (0.531 - 1.549) | 0.721 |
|                 |  | MCP-4 Q1             | Reference             |                    | Reference             |       |
| ASD-YesID vs GP |  | MCP-4 Q4             | 0.681 (0.396 - 1.172) | 0.165              | 0.691 (0.388 - 1.23)  | 0.209 |
|                 |  | MCP-4 Q3             | 0.864 (0.512 - 1.459) | 0.584              | 0.877 (0.512 - 1.502) | 0.633 |
|                 |  | MCP-4 Q2             | 1.244 (0.75 - 2.062)  | 0.397              | 1.273 (0.76 - 2.132)  | 0.359 |
|                 |  | MCP-4 Q1             | Reference             |                    | Reference             |       |
| ASD-EO vs GP    |  | MCP-4 Q4             | 0.821 (0.527 - 1.281) | 0.385              | 0.847 (0.525 - 1.365) | 0.495 |
|                 |  | MCP-4 Q3             | 0.868 (0.556 - 1.355) | 0.533              | 0.88 (0.556 - 1.394)  | 0.587 |
|                 |  | MCP-4 Q2             | 1.059 (0.68 - 1.649)  | 0.8                | 1.062 (0.674 - 1.674) | 0.796 |
|                 |  | MCP-4 Q1             | Reference             |                    | Reference             |       |
| ASD-Reg vs GP   |  | MCP-4 Q4             | 0.956 (0.496 - 1.842) | 0.892              | 0.857 (0.426 - 1.727) | 0.667 |
|                 |  | MCP-4 Q3             | 1.038 (0.541 - 1.992) | 0.911              | 0.955 (0.487 - 1.874) | 0.894 |
|                 |  | MCP-4 Q2             | 1.143 (0.594 - 2.201) | 0.69               | 1.095 (0.559 - 2.144) | 0.792 |
|                 |  | MCP-4 Q1             | Reference             |                    | Reference             |       |
| DD vs GP        |  | MCP-4 Q4             | 1.063 (0.615 - 1.838) | 0.826              | 1.072 (0.585 - 1.964) | 0.823 |
|                 |  | MCP-4 Q3             | 1.078 (0.622 - 1.871) | 0.788              | 1.112 (0.616 - 2.009) | 0.724 |
|                 |  | MCP-4 Q2             | 0.969 (0.545 - 1.721) | 0.914              | 1.165 (0.632 - 2.149) | 0.625 |
|                 |  | MCP-4 Q1             | Reference             |                    | Reference             |       |
| ASD vs DD       |  | MCP-4 Q4             | 0.83 (0.478 - 1.441)  | 0.507              | 0.824 (0.444 - 1.532) | 0.541 |
|                 |  | MCP-4 Q3             | 0.889 (0.512 - 1.545) | 0.678              | 0.855 (0.469 - 1.559) | 0.61  |
|                 |  | MCP-4 Q2             | 1.125 (0.635 - 1.993) | 0.686              | 0.927 (0.5 - 1.719)   | 0.81  |
|                 |  | MCP-4 Q1             | Reference             |                    | Reference             |       |
| ASD-NoID vs DD  |  | MCP-4 Q4             | 0.897 (0.48 - 1.674)  | 0.732              | 0.859 (0.428 - 1.724) | 0.67  |
|                 |  | MCP-4 Q3             | 0.979 (0.526 - 1.825) | 0.947              | 0.908 (0.464 - 1.776) | 0.779 |
|                 |  | MCP-4 Q2             | 0.96 (0.499 - 1.849)  | 0.903              | 0.779 (0.386 - 1.569) | 0.484 |

|           |             | <b>Crude</b>         |                       | <b>Adjusted</b>    |                       |       |
|-----------|-------------|----------------------|-----------------------|--------------------|-----------------------|-------|
|           |             | <b>OR (95% CI)</b>   | <b>P-Value</b>        | <b>OR (95% CI)</b> | <b>P-Value</b>        |       |
|           |             | <b>Immune Marker</b> |                       |                    |                       |       |
| ASD-YesID | vs DD       | MCP-4 Q1             | Reference             |                    | Reference             |       |
|           |             | MCP-4 Q4             | 0.64 (0.332 - 1.236)  | 0.184              | 0.645 (0.313 - 1.329) | 0.234 |
|           |             | MCP-4 Q3             | 0.801 (0.421 - 1.524) | 0.499              | 0.788 (0.397 - 1.565) | 0.497 |
|           |             | MCP-4 Q2             | 1.284 (0.675 - 2.442) | 0.446              | 1.093 (0.552 - 2.164) | 0.8   |
| ASD-EO    | vs DD       | MCP-4 Q1             | Reference             |                    | Reference             |       |
|           |             | MCP-4 Q4             | 0.772 (0.433 - 1.378) | 0.382              | 0.79 (0.412 - 1.515)  | 0.478 |
|           |             | MCP-4 Q3             | 0.805 (0.451 - 1.438) | 0.464              | 0.791 (0.421 - 1.486) | 0.466 |
|           |             | MCP-4 Q2             | 1.093 (0.603 - 1.981) | 0.77               | 0.911 (0.479 - 1.733) | 0.777 |
| ASD-Reg   | vs DD       | MCP-4 Q1             | Reference             |                    | Reference             |       |
|           |             | MCP-4 Q4             | 0.899 (0.423 - 1.91)  | 0.781              | 0.8 (0.351 - 1.821)   | 0.595 |
|           |             | MCP-4 Q3             | 0.962 (0.454 - 2.04)  | 0.92               | 0.858 (0.388 - 1.901) | 0.707 |
|           |             | MCP-4 Q2             | 1.18 (0.548 - 2.538)  | 0.672              | 0.94 (0.42 - 2.104)   | 0.88  |
| ASD-YesID | vs ASD-NoID | MCP-4 Q1             | Reference             |                    | Reference             |       |
|           |             | MCP-4 Q4             | 0.714 (0.384 - 1.328) | 0.287              | 0.751 (0.388 - 1.451) | 0.394 |
|           |             | MCP-4 Q3             | 0.818 (0.45 - 1.489)  | 0.511              | 0.868 (0.47 - 1.604)  | 0.651 |
|           |             | MCP-4 Q2             | 1.337 (0.737 - 2.425) | 0.339              | 1.403 (0.764 - 2.576) | 0.274 |
| ASD-Reg   | vs ASD-EO   | MCP-4 Q1             | Reference             |                    | Reference             |       |
|           |             | MCP-4 Q4             | 1.164 (0.588 - 2.304) | 0.664              | 1.012 (0.488 - 2.101) | 0.974 |
|           |             | MCP-4 Q3             | 1.196 (0.607 - 2.353) | 0.605              | 1.085 (0.539 - 2.186) | 0.819 |
|           |             | MCP-4 Q2             | 1.079 (0.551 - 2.116) | 0.824              | 1.031 (0.516 - 2.059) | 0.931 |
| ASD       | vs GP       | MCP-4 Q1             | Reference             |                    | Reference             |       |
|           |             | MCP-4 >10%           | 1.17 (0.723 - 1.893)  | 0.524              | 1.133 (0.688 - 1.865) | 0.093 |
| ASD-NoID  | vs GP       | MCP-4 ≤10%           | Reference             |                    | Reference             |       |
|           |             | MCP-4 >10%           | 1.135 (0.624 - 2.062) | 0.678              | 1.017 (0.547 - 1.893) | 0.957 |
| ASD-YesID | vs GP       | MCP-4 ≤10%           | Reference             |                    | Reference             |       |
|           |             | MCP-4 >10%           | 1.087 (0.59 - 2.004)  | 0.788              | 1.14 (0.607 - 2.142)  | 0.684 |
| ASD-EO    | vs GP       | MCP-4 ≤10%           | Reference             |                    | Reference             |       |
|           |             | MCP-4 >10%           | 1.398 (0.804 - 2.43)  | 0.235              | 1.381 (0.779 - 2.449) | 0.269 |

|                      |             |            | <i>Crude</i>          |                | <i>Adjusted</i>       |                |
|----------------------|-------------|------------|-----------------------|----------------|-----------------------|----------------|
| <i>Immune Marker</i> |             |            | <i>OR (95% CI)</i>    | <i>P-Value</i> | <i>OR (95% CI)</i>    | <i>P-Value</i> |
| ASD-Reg              | vs GP       | MCP-4 ≤10% | Reference             |                | Reference             |                |
|                      |             | MCP-4 >10% | 0.719 (0.367 - 1.408) | 0.336          | 0.673 (0.333 - 1.361) | 0.271          |
|                      |             | MCP-4 ≤10% | Reference             |                | Reference             |                |
| DD                   | vs GP       | MCP-4 >10% | 1.723 (0.813 - 3.649) | 0.678          | 1.983 (0.893 - 4.406) | 0.093          |
|                      |             | MCP-4 ≤10% | Reference             |                | Reference             |                |
| ASD                  | vs DD       | MCP-4 >10% | 0.679 (0.317 - 1.455) | 0.319          | 0.571 (0.252 - 1.294) | 0.18           |
| ASD-NoID             | vs DD       | MCP-4 ≤10% | Reference             |                | Reference             |                |
|                      |             | MCP-4 >10% | 0.659 (0.284 - 1.526) | 0.33           | 0.513 (0.209 - 1.26)  | 0.146          |
| ASD-YesID            | vs DD       | MCP-4 ≤10% | Reference             |                | Reference             |                |
|                      |             | MCP-4 >10% | 0.631 (0.27 - 1.477)  | 0.289          | 0.575 (0.233 - 1.418) | 0.229          |
| ASD-EO               | vs DD       | MCP-4 ≤10% | Reference             |                | Reference             |                |
|                      |             | MCP-4 >10% | 0.811 (0.361 - 1.822) | 0.613          | 0.696 (0.292 - 1.659) | 0.414          |
| ASD-Reg              | vs DD       | MCP-4 ≤10% | Reference             |                | Reference             |                |
|                      |             | MCP-4 >10% | 0.417 (0.171 - 1.021) | 0.056          | 0.339 (0.131 - 0.878) | <b>0.026</b>   |
| ASD-YesID            | vs ASD-NoID | MCP-4 ≤10% | Reference             |                | Reference             |                |
|                      |             | MCP-4 >10% | 0.958 (0.467 - 1.965) | 0.907          | 1.121 (0.533 - 2.355) | 0.764          |
| ASD-Reg              | vs ASD-EO   | MCP-4 ≤10% | Reference             |                | Reference             |                |
|                      |             | MCP-4 >10% | 0.515 (0.246 - 1.075) | 0.077          | 0.488 (0.225 - 1.055) | 0.068          |
| ASD                  | vs GP       | MCP-4 ≥90% | 1.056 (0.651 - 1.711) | 0.826          | 1.183 (0.703 - 1.99)  | 0.528          |
|                      |             | MCP-4 <90% | Reference             |                | Reference             |                |
| ASD-NoID             | vs GP       | MCP-4 ≥90% | 1.323 (0.753 - 2.323) | 0.33           | 1.31 (0.709 - 2.423)  | 0.389          |
|                      |             | MCP-4 <90% | Reference             |                | Reference             |                |
| ASD-YesID            | vs GP       | MCP-4 ≥90% | 0.621 (0.3 - 1.283)   | 0.198          | 0.769 (0.357 - 1.654) | 0.501          |
|                      |             | MCP-4 <90% | Reference             |                | Reference             |                |
| ASD-EO               | vs GP       | MCP-4 ≥90% | 0.888 (0.513 - 1.537) | 0.672          | 1.034 (0.574 - 1.863) | 0.911          |

|                      |             |            | <i>Crude</i>          |                | <i>Adjusted</i>       |                |
|----------------------|-------------|------------|-----------------------|----------------|-----------------------|----------------|
| <i>Immune Marker</i> |             |            | <i>OR (95% CI)</i>    | <i>P-Value</i> | <i>OR (95% CI)</i>    | <i>P-Value</i> |
| ASD-Reg              | vs GP       | MCP-4 <90% | Reference             |                | Reference             |                |
|                      |             | MCP-4 ≥90% | 1.563 (0.792 - 3.085) | 0.198          | 1.682 (0.791 - 3.577) | 0.176          |
|                      |             | MCP-4 <90% | Reference             |                | Reference             |                |
| DD                   | vs GP       | MCP-4 ≥90% | 1.492 (0.824 - 2.7)   | 0.186          | 1.335 (0.674 - 2.643) | 0.407          |
|                      |             | MCP-4 <90% | Reference             |                | Reference             |                |
| ASD                  | vs DD       | MCP-4 ≥90% | 0.708 (0.392 - 1.278) | 0.251          | 0.886 (0.443 - 1.769) | 0.731          |
| ASD-NoID             | vs DD       | MCP-4 <90% | Reference             |                | Reference             |                |
|                      |             | MCP-4 ≥90% | 0.887 (0.459 - 1.712) | 0.72           | 0.982 (0.455 - 2.115) | 0.962          |
| ASD-YesID            | vs DD       | MCP-4 <90% | Reference             |                | Reference             |                |
|                      |             | MCP-4 ≥90% | 0.416 (0.187 - 0.928) | <b>0.032</b>   | 0.576 (0.237 - 1.399) | 0.223          |
| ASD-EO               | vs DD       | MCP-4 <90% | Reference             |                | Reference             |                |
|                      |             | MCP-4 ≥90% | 0.595 (0.312 - 1.135) | 0.115          | 0.775 (0.367 - 1.635) | 0.503          |
| ASD-Reg              | vs DD       | MCP-4 <90% | Reference             |                | Reference             |                |
|                      |             | MCP-4 ≥90% | 1.048 (0.49 - 2.242)  | 0.904          | 1.26 (0.526 - 3.021)  | 0.604          |
| ASD-YesID            | vs ASD-NoID | MCP-4 <90% | Reference             |                | Reference             |                |
|                      |             | MCP-4 ≥90% | 0.469 (0.215 - 1.024) | 0.057          | 0.587 (0.255 - 1.349) | 0.209          |
| ASD-Reg              | vs ASD-EO   | MCP-4 <90% | Reference             |                | Reference             |                |
|                      |             | MCP-4 ≥90% | 1.76 (0.852 - 3.637)  | 0.127          | 1.627 (0.729 - 3.63)  | 0.235          |
| ASD                  | vs GP       | MDC        | 0.951 (0.627 - 1.444) | 0.815          | 0.97 (0.588 - 1.601)  | 0.906          |
| ASD-NoID             | vs GP       | MDC        | 0.977 (0.583 - 1.638) | 0.929          | 0.986 (0.53 - 1.835)  | 0.965          |
| ASD-YesID            | vs GP       | MDC        | 0.856 (0.502 - 1.459) | 0.567          | 0.924 (0.481 - 1.774) | 0.812          |
| ASD-EO               | vs GP       | MDC        | 0.867 (0.55 - 1.366)  | 0.537          | 0.877 (0.505 - 1.523) | 0.642          |
| ASD-Reg              | vs GP       | MDC        | 1.243 (0.639 - 2.42)  | 0.522          | 1.407 (0.637 - 3.112) | 0.399          |
| DD                   | vs GP       | MDC        | 0.693 (0.395 - 1.215) | 0.2            | 0.814 (0.418 - 1.585) | 0.544          |



|                      |             |     | <i>Crude</i>          |                | <i>Adjusted</i>       |                |
|----------------------|-------------|-----|-----------------------|----------------|-----------------------|----------------|
|                      |             |     | <i>OR (95% CI)</i>    | <i>P-Value</i> | <i>OR (95% CI)</i>    | <i>P-Value</i> |
| <i>Immune Marker</i> |             |     |                       |                |                       |                |
| ASD                  | vs DD       | MDC | 1.374 (0.782 - 2.413) | 0.269          | 1.192 (0.604 - 2.353) | 0.612          |
| ASD-NoID             | vs DD       | MDC | 1.41 (0.743 - 2.676)  | 0.293          | 1.212 (0.559 - 2.629) | 0.626          |
| ASD-YesID            | vs DD       | MDC | 1.235 (0.642 - 2.376) | 0.526          | 1.135 (0.513 - 2.514) | 0.755          |
| ASD-EO               | vs DD       | MDC | 1.251 (0.693 - 2.26)  | 0.457          | 1.078 (0.525 - 2.216) | 0.838          |
| ASD-Reg              | vs DD       | MDC | 1.795 (0.834 - 3.863) | 0.135          | 1.73 (0.693 - 4.317)  | 0.24           |
| ASD-YesID            | vs ASD-NoID | MDC | 0.876 (0.473 - 1.622) | 0.673          | 0.937 (0.441 - 1.988) | 0.865          |
| ASD-Reg              | vs ASD-EO   | MDC | 1.434 (0.718 - 2.864) | 0.307          | 1.604 (0.699 - 3.683) | 0.265          |
| ASD                  | vs GP       | MIF | 1.134 (0.835 - 1.54)  | 0.42           | 1.001 (0.537 - 1.869) | 0.997          |
| ASD-NoID             | vs GP       | MIF | 1.123 (0.769 - 1.639) | 0.549          | 1.389 (0.65 - 2.965)  | 0.396          |
| ASD-YesID            | vs GP       | MIF | 1.094 (0.739 - 1.619) | 0.653          | 0.755 (0.349 - 1.633) | 0.474          |
| ASD-EO               | vs GP       | MIF | 1.142 (0.818 - 1.594) | 0.435          | 1.086 (0.549 - 2.15)  | 0.813          |
| ASD-Reg              | vs GP       | MIF | 1.032 (0.634 - 1.681) | 0.898          | 0.632 (0.255 - 1.568) | 0.323          |
| DD                   | vs GP       | MIF | 0.836 (0.553 - 1.263) | 0.395          | 0.935 (0.417 - 2.096) | 0.871          |
| ASD                  | vs DD       | MIF | 1.357 (0.896 - 2.055) | 0.149          | 1.071 (0.473 - 2.425) | 0.87           |
| ASD-NoID             | vs DD       | MIF | 1.343 (0.839 - 2.151) | 0.219          | 1.485 (0.582 - 3.787) | 0.408          |
| ASD-YesID            | vs DD       | MIF | 1.309 (0.809 - 2.119) | 0.273          | 0.807 (0.326 - 2)     | 0.643          |
| ASD-EO               | vs DD       | MIF | 1.366 (0.884 - 2.112) | 0.16           | 1.161 (0.486 - 2.774) | 0.736          |
| ASD-Reg              | vs DD       | MIF | 1.235 (0.704 - 2.165) | 0.461          | 0.676 (0.245 - 1.867) | 0.45           |
| ASD-YesID            | vs ASD-NoID | MIF | 0.974 (0.621 - 1.53)  | 0.91           | 0.543 (0.222 - 1.33)  | 0.182          |
| ASD-Reg              | vs ASD-EO   | MIF | 0.904 (0.545 - 1.498) | 0.695          | 0.582 (0.223 - 1.52)  | 0.269          |
| ASD                  | vs GP       | MIG | 1.263 (0.88 - 1.814)  | 0.205          | 1.261 (0.847 - 1.878) | 0.253          |
| ASD-NoID             | vs GP       | MIG | 1.131 (0.723 - 1.768) | 0.591          | 1.064 (0.646 - 1.754) | 0.807          |
| ASD-YesID            | vs GP       | MIG | 1.343 (0.844 - 2.138) | 0.213          | 1.477 (0.884 - 2.47)  | 0.137          |
| ASD-EO               | vs GP       | MIG | 1.147 (0.774 - 1.701) | 0.494          | 1.12 (0.723 - 1.735)  | 0.611          |

|                      |             |        | <i>Crude</i>          |                | <i>Adjusted</i>       |                |
|----------------------|-------------|--------|-----------------------|----------------|-----------------------|----------------|
| <i>Immune Marker</i> |             |        | <i>OR (95% CI)</i>    | <i>P-Value</i> | <i>OR (95% CI)</i>    | <i>P-Value</i> |
| ASD-Reg              | vs GP       | MIG    | 1.736 (0.971 - 3.105) | 0.063          | 1.875 (0.989 - 3.556) | 0.054          |
| DD                   | vs GP       | MIG    | 1.075 (0.66 - 1.751)  | 0.771          | 1.367 (0.794 - 2.354) | 0.259          |
| ASD                  | vs DD       | MIG    | 1.175 (0.72 - 1.919)  | 0.519          | 0.922 (0.529 - 1.609) | 0.776          |
| ASD-NoID             | vs DD       | MIG    | 1.052 (0.603 - 1.835) | 0.859          | 0.778 (0.413 - 1.467) | 0.438          |
| ASD-YesID            | vs DD       | MIG    | 1.25 (0.706 - 2.211)  | 0.444          | 1.08 (0.568 - 2.054)  | 0.814          |
| ASD-EO               | vs DD       | MIG    | 1.067 (0.638 - 1.786) | 0.804          | 0.819 (0.455 - 1.474) | 0.506          |
| ASD-Reg              | vs DD       | MIG    | 1.615 (0.828 - 3.153) | 0.16           | 1.371 (0.651 - 2.889) | 0.406          |
| ASD-YesID            | vs ASD-NoID | MIG    | 1.188 (0.695 - 2.031) | 0.528          | 1.388 (0.76 - 2.536)  | 0.286          |
| ASD-Reg              | vs ASD-EO   | MIG    | 1.514 (0.828 - 2.767) | 0.178          | 1.674 (0.855 - 3.278) | 0.133          |
| ASD                  | vs GP       | MIP-1A | 1.309 (0.783 - 2.188) | 0.305          | 1.33 (0.689 - 2.569)  | 0.395          |
| ASD-NoID             | vs GP       | MIP-1A | 1.488 (0.806 - 2.747) | 0.204          | 1.688 (0.793 - 3.595) | 0.175          |
| ASD-YesID            | vs GP       | MIP-1A | 1.206 (0.624 - 2.33)  | 0.577          | 1.1 (0.46 - 2.629)    | 0.831          |
| ASD-EO               | vs GP       | MIP-1A | 1.156 (0.656 - 2.037) | 0.616          | 1.038 (0.484 - 2.227) | 0.924          |
| ASD-Reg              | vs GP       | MIP-1A | 1.769 (0.85 - 3.679)  | 0.127          | 2.338 (1.011 - 5.407) | <b>0.047</b>   |
| DD                   | vs GP       | MIP-1A | 1.07 (0.527 - 2.17)   | 0.852          | 1.075 (0.479 - 2.416) | 0.86           |
| ASD                  | vs DD       | MIP-1A | 1.223 (0.608 - 2.461) | 0.572          | 1.237 (0.555 - 2.757) | 0.603          |
| ASD-NoID             | vs DD       | MIP-1A | 1.391 (0.641 - 3.017) | 0.403          | 1.57 (0.649 - 3.799)  | 0.317          |
| ASD-YesID            | vs DD       | MIP-1A | 1.128 (0.501 - 2.538) | 0.772          | 1.023 (0.386 - 2.71)  | 0.964          |
| ASD-EO               | vs DD       | MIP-1A | 1.081 (0.516 - 2.262) | 0.837          | 0.965 (0.393 - 2.371) | 0.938          |
| ASD-Reg              | vs DD       | MIP-1A | 1.653 (0.692 - 3.952) | 0.258          | 2.174 (0.867 - 5.453) | 0.098          |
| ASD-YesID            | vs ASD-NoID | MIP-1A | 0.811 (0.392 - 1.677) | 0.571          | 0.651 (0.255 - 1.661) | 0.369          |
| ASD-Reg              | vs ASD-EO   | MIP-1A | 1.53 (0.716 - 3.268)  | 0.272          | 2.253 (0.898 - 5.654) | 0.084          |
| ASD                  | vs GP       | MIP-1D | 1.135 (0.856 - 1.504) | 0.38           | 1.191 (0.864 - 1.641) | 0.286          |

|                      |             |        | <b>Crude</b>          |                | <b>Adjusted</b>       |                |
|----------------------|-------------|--------|-----------------------|----------------|-----------------------|----------------|
| <b>Immune Marker</b> |             |        | <b>OR (95% CI)</b>    | <b>P-Value</b> | <b>OR (95% CI)</b>    | <b>P-Value</b> |
| ASD-NoID             | vs GP       | MIP-1D | 1.285 (0.911 - 1.812) | 0.153          | 1.372 (0.924 - 2.035) | 0.117          |
| ASD-YesID            | vs GP       | MIP-1D | 0.988 (0.686 - 1.423) | 0.948          | 0.966 (0.638 - 1.462) | 0.87           |
| ASD-EO               | vs GP       | MIP-1D | 1.123 (0.826 - 1.527) | 0.46           | 1.12 (0.787 - 1.593)  | 0.53           |
| ASD-Reg              | vs GP       | MIP-1D | 0.999 (0.636 - 1.57)  | 0.996          | 1.147 (0.686 - 1.92)  | 0.601          |
| DD                   | vs GP       | MIP-1D | 1.138 (0.778 - 1.663) | 0.505          | 1.342 (0.876 - 2.056) | 0.176          |
| ASD                  | vs DD       | MIP-1D | 0.997 (0.683 - 1.456) | 0.988          | 0.887 (0.575 - 1.367) | 0.587          |
| ASD-NoID             | vs DD       | MIP-1D | 1.129 (0.737 - 1.73)  | 0.576          | 1.022 (0.626 - 1.667) | 0.932          |
| ASD-YesID            | vs DD       | MIP-1D | 0.868 (0.557 - 1.354) | 0.533          | 0.72 (0.434 - 1.193)  | 0.202          |
| ASD-EO               | vs DD       | MIP-1D | 0.987 (0.663 - 1.469) | 0.948          | 0.834 (0.527 - 1.319) | 0.438          |
| ASD-Reg              | vs DD       | MIP-1D | 0.878 (0.523 - 1.474) | 0.622          | 0.855 (0.475 - 1.539) | 0.601          |
| ASD-YesID            | vs ASD-NoID | MIP-1D | 0.769 (0.508 - 1.163) | 0.213          | 0.704 (0.438 - 1.132) | 0.148          |
| ASD-Reg              | vs ASD-EO   | MIP-1D | 0.89 (0.557 - 1.42)   | 0.624          | 1.025 (0.6 - 1.752)   | 0.929          |
| ASD                  | vs GP       | MIP-3A | 1.245 (0.739 - 2.095) | 0.41           | 1.473 (0.75 - 2.893)  | 0.261          |
| ASD-NoID             | vs GP       | MIP-3A | 1.345 (0.702 - 2.579) | 0.372          | 1.843 (0.791 - 4.294) | 0.156          |
| ASD-YesID            | vs GP       | MIP-3A | 1.034 (0.534 - 1.999) | 0.922          | 1.242 (0.521 - 2.964) | 0.625          |
| ASD-EO               | vs GP       | MIP-3A | 1.153 (0.655 - 2.031) | 0.621          | 1.418 (0.68 - 2.957)  | 0.351          |
| ASD-Reg              | vs GP       | MIP-3A | 1.562 (0.67 - 3.643)  | 0.302          | 2.083 (0.67 - 6.473)  | 0.205          |
| DD                   | vs GP       | MIP-3A | 0.984 (0.492 - 1.968) | 0.964          | 0.765 (0.319 - 1.838) | 0.55           |
| ASD                  | vs DD       | MIP-3A | 1.265 (0.628 - 2.549) | 0.511          | 1.924 (0.777 - 4.765) | 0.157          |
| ASD-NoID             | vs DD       | MIP-3A | 1.367 (0.613 - 3.05)  | 0.445          | 2.408 (0.849 - 6.83)  | 0.098          |
| ASD-YesID            | vs DD       | MIP-3A | 1.05 (0.467 - 2.36)   | 0.905          | 1.623 (0.565 - 4.66)  | 0.368          |
| ASD-EO               | vs DD       | MIP-3A | 1.172 (0.562 - 2.445) | 0.672          | 1.853 (0.713 - 4.818) | 0.206          |
| ASD-Reg              | vs DD       | MIP-3A | 1.587 (0.603 - 4.18)  | 0.35           | 2.721 (0.757 - 9.787) | 0.125          |

|                      |             |        | <i>Crude</i>          |                | <i>Adjusted</i>       |                |
|----------------------|-------------|--------|-----------------------|----------------|-----------------------|----------------|
| <i>Immune Marker</i> |             |        | <i>OR (95% CI)</i>    | <i>P-Value</i> | <i>OR (95% CI)</i>    | <i>P-Value</i> |
| ASD-YesID            | vs ASD-NoID | MIP-3A | 0.768 (0.355 - 1.665) | 0.504          | 0.674 (0.244 - 1.864) | 0.447          |
| ASD-Reg              | vs ASD-EO   | MIP-3A | 1.354 (0.561 - 3.266) | 0.5            | 1.468 (0.452 - 4.775) | 0.523          |
| ASD                  | vs GP       | MIP-3B | 1.18 (0.896 - 1.555)  | 0.238          | 1.194 (0.891 - 1.601) | 0.235          |
| ASD-NoID             | vs GP       | MIP-3B | 1.088 (0.774 - 1.53)  | 0.627          | 1.075 (0.744 - 1.553) | 0.701          |
| ASD-YesID            | vs GP       | MIP-3B | 1.244 (0.873 - 1.771) | 0.227          | 1.314 (0.902 - 1.913) | 0.155          |
| ASD-EO               | vs GP       | MIP-3B | 1.09 (0.808 - 1.472)  | 0.572          | 1.093 (0.791 - 1.51)  | 0.589          |
| ASD-Reg              | vs GP       | MIP-3B | 1.501 (0.966 - 2.331) | 0.071          | 1.58 (0.993 - 2.516)  | 0.054          |
| DD                   | vs GP       | MIP-3B | 1.03 (0.71 - 1.494)   | 0.877          | 1.278 (0.853 - 1.914) | 0.234          |
| ASD                  | vs DD       | MIP-3B | 1.146 (0.789 - 1.665) | 0.475          | 0.935 (0.619 - 1.412) | 0.748          |
| ASD-NoID             | vs DD       | MIP-3B | 1.057 (0.691 - 1.615) | 0.799          | 0.841 (0.526 - 1.345) | 0.47           |
| ASD-YesID            | vs DD       | MIP-3B | 1.207 (0.782 - 1.864) | 0.395          | 1.028 (0.64 - 1.65)   | 0.909          |
| ASD-EO               | vs DD       | MIP-3B | 1.059 (0.715 - 1.567) | 0.776          | 0.855 (0.553 - 1.322) | 0.482          |
| ASD-Reg              | vs DD       | MIP-3B | 1.457 (0.877 - 2.42)  | 0.146          | 1.237 (0.717 - 2.133) | 0.445          |
| ASD-YesID            | vs ASD-NoID | MIP-3B | 1.143 (0.76 - 1.718)  | 0.521          | 1.222 (0.787 - 1.9)   | 0.372          |
| ASD-Reg              | vs ASD-EO   | MIP-3B | 1.377 (0.872 - 2.174) | 0.171          | 1.446 (0.887 - 2.355) | 0.139          |
| ASD                  | vs GP       | MPIF-1 | 0.935 (0.74 - 1.18)   | 0.569          | 0.938 (0.727 - 1.209) | 0.621          |
| ASD-NoID             | vs GP       | MPIF-1 | 1.028 (0.768 - 1.376) | 0.852          | 1.05 (0.763 - 1.444)  | 0.766          |
| ASD-YesID            | vs GP       | MPIF-1 | 0.869 (0.648 - 1.167) | 0.351          | 0.897 (0.65 - 1.237)  | 0.507          |
| ASD-EO               | vs GP       | MPIF-1 | 0.956 (0.741 - 1.233) | 0.728          | 0.982 (0.743 - 1.299) | 0.899          |
| ASD-Reg              | vs GP       | MPIF-1 | 0.891 (0.618 - 1.284) | 0.536          | 0.857 (0.58 - 1.268)  | 0.441          |
| DD                   | vs GP       | MPIF-1 | 0.716 (0.53 - 0.968)  | <b>0.03</b>    | 0.796 (0.561 - 1.129) | 0.201          |
| ASD                  | vs DD       | MPIF-1 | 1.305 (0.966 - 1.763) | 0.083          | 1.178 (0.828 - 1.676) | 0.363          |
| ASD-NoID             | vs DD       | MPIF-1 | 1.435 (1.013 - 2.035) | <b>0.042</b>   | 1.318 (0.881 - 1.973) | 0.18           |
| ASD-YesID            | vs DD       | MPIF-1 | 1.214 (0.855 - 1.723) | 0.279          | 1.126 (0.754 - 1.683) | 0.562          |

|                      |             |          | <i>Crude</i>          |                | <i>Adjusted</i>        |                |
|----------------------|-------------|----------|-----------------------|----------------|------------------------|----------------|
| <i>Immune Marker</i> |             |          | <i>OR (95% CI)</i>    | <i>P-Value</i> | <i>OR (95% CI)</i>     | <i>P-Value</i> |
| ASD-EO               | vs DD       | MPIF-1   | 1.334 (0.971 - 1.834) | 0.075          | 1.233 (0.849 - 1.791)  | 0.27           |
| ASD-Reg              | vs DD       | MPIF-1   | 1.244 (0.824 - 1.878) | 0.299          | 1.077 (0.681 - 1.703)  | 0.752          |
| ASD-YesID            | vs ASD-NoID | MPIF-1   | 0.846 (0.6 - 1.191)   | 0.337          | 0.854 (0.588 - 1.242)  | 0.41           |
| ASD-Reg              | vs ASD-EO   | MPIF-1   | 0.932 (0.638 - 1.362) | 0.717          | 0.873 (0.581 - 1.313)  | 0.514          |
| ASD                  | vs GP       | SCYB16   | 1.136 (0.809 - 1.596) | 0.462          | 1.245 (0.847 - 1.83)   | 0.265          |
| ASD-NoID             | vs GP       | SCYB16   | 1.291 (0.847 - 1.968) | 0.235          | 1.401 (0.861 - 2.278)  | 0.174          |
| ASD-YesID            | vs GP       | SCYB16   | 0.992 (0.642 - 1.533) | 0.972          | 1.106 (0.677 - 1.805)  | 0.688          |
| ASD-EO               | vs GP       | SCYB16   | 1.104 (0.762 - 1.6)   | 0.601          | 1.18 (0.772 - 1.805)   | 0.444          |
| ASD-Reg              | vs GP       | SCYB16   | 1.289 (0.75 - 2.213)  | 0.358          | 1.468 (0.794 - 2.713)  | 0.221          |
| DD                   | vs GP       | SCYB16   | 1.289 (0.814 - 2.044) | 0.279          | 1.25 (0.753 - 2.076)   | 0.388          |
| ASD                  | vs DD       | SCYB16   | 0.881 (0.555 - 1.398) | 0.591          | 0.996 (0.591 - 1.676)  | 0.987          |
| ASD-NoID             | vs DD       | SCYB16   | 1.001 (0.593 - 1.691) | 0.997          | 1.12 (0.615 - 2.042)   | 0.711          |
| ASD-YesID            | vs DD       | SCYB16   | 0.769 (0.45 - 1.315)  | 0.338          | 0.884 (0.485 - 1.613)  | 0.688          |
| ASD-EO               | vs DD       | SCYB16   | 0.856 (0.527 - 1.39)  | 0.53           | 0.944 (0.543 - 1.641)  | 0.838          |
| ASD-Reg              | vs DD       | SCYB16   | 0.999 (0.535 - 1.866) | 0.998          | 1.174 (0.581 - 2.372)  | 0.655          |
| ASD-YesID            | vs ASD-NoID | SCYB16   | 0.769 (0.465 - 1.271) | 0.305          | 0.789 (0.443 - 1.407)  | 0.423          |
| ASD-Reg              | vs ASD-EO   | SCYB16   | 1.167 (0.665 - 2.047) | 0.59           | 1.243 (0.652 - 2.371)  | 0.508          |
| ASD                  | vs GP       | SDF-1A-B | 1.522 (0.755 - 3.071) | 0.241          | 1.544 (0.675 - 3.531)  | 0.303          |
| ASD-NoID             | vs GP       | SDF-1A-B | 1.728 (0.714 - 4.179) | 0.225          | 2.067 (0.737 - 5.798)  | 0.168          |
| ASD-YesID            | vs GP       | SDF-1A-B | 1.276 (0.522 - 3.12)  | 0.593          | 1.313 (0.448 - 3.851)  | 0.619          |
| ASD-EO               | vs GP       | SDF-1A-B | 1.38 (0.643 - 2.96)   | 0.408          | 1.447 (0.588 - 3.562)  | 0.421          |
| ASD-Reg              | vs GP       | SDF-1A-B | 2.199 (0.689 - 7.022) | 0.183          | 2.616 (0.646 - 10.597) | 0.178          |
| DD                   | vs GP       | SDF-1A-B | 0.866 (0.348 - 2.154) | 0.756          | 0.793 (0.269 - 2.339)  | 0.674          |

|                      |             |          | <i>Crude</i>          |                | <i>Adjusted</i>       |                |
|----------------------|-------------|----------|-----------------------|----------------|-----------------------|----------------|
| <i>Immune Marker</i> |             |          | <i>OR (95% CI)</i>    | <i>P-Value</i> | <i>OR (95% CI)</i>    | <i>P-Value</i> |
| ASD                  | vs DD       | SDF-1A-B | 1.759 (0.694 - 4.454) | 0.234          | 1.949 (0.635 - 5.977) | 0.243          |
| ASD-NoID             | vs DD       | SDF-1A-B | 1.996 (0.683 - 5.838) | 0.207          | 2.608 (0.723 - 9.407) | 0.143          |
| ASD-YesID            | vs DD       | SDF-1A-B | 1.474 (0.5 - 4.348)   | 0.482          | 1.657 (0.448 - 6.135) | 0.449          |
| ASD-EO               | vs DD       | SDF-1A-B | 1.594 (0.601 - 4.232) | 0.349          | 1.826 (0.56 - 5.948)  | 0.318          |
| ASD-Reg              | vs DD       | SDF-1A-B | 2.541 (0.685 - 9.432) | 0.163          | 3.3 (0.677 - 16.092)  | 0.14           |
| ASD-YesID            | vs ASD-NoID | SDF-1A-B | 0.738 (0.257 - 2.122) | 0.573          | 0.635 (0.181 - 2.231) | 0.479          |
| ASD-Reg              | vs ASD-EO   | SDF-1A-B | 1.594 (0.476 - 5.34)  | 0.45           | 1.808 (0.42 - 7.778)  | 0.426          |
| ASD                  | vs GP       | TARC     | 1.143 (0.886 - 1.475) | 0.303          | 1.147 (0.876 - 1.502) | 0.319          |
| ASD-NoID             | vs GP       | TARC     | 1.032 (0.753 - 1.415) | 0.845          | 1.026 (0.731 - 1.44)  | 0.883          |
| ASD-YesID            | vs GP       | TARC     | 1.222 (0.882 - 1.694) | 0.228          | 1.263 (0.893 - 1.786) | 0.186          |
| ASD-EO               | vs GP       | TARC     | 1.069 (0.81 - 1.412)  | 0.637          | 1.07 (0.794 - 1.441)  | 0.656          |
| ASD-Reg              | vs GP       | TARC     | 1.4 (0.935 - 2.098)   | 0.102          | 1.441 (0.944 - 2.201) | 0.09           |
| DD                   | vs GP       | TARC     | 1.009 (0.715 - 1.425) | 0.958          | 1.224 (0.845 - 1.771) | 0.285          |
| ASD                  | vs DD       | TARC     | 1.133 (0.802 - 1.6)   | 0.48           | 0.937 (0.643 - 1.367) | 0.737          |
| ASD-NoID             | vs DD       | TARC     | 1.022 (0.69 - 1.514)  | 0.912          | 0.838 (0.545 - 1.29)  | 0.422          |
| ASD-YesID            | vs DD       | TARC     | 1.211 (0.811 - 1.809) | 0.35           | 1.032 (0.669 - 1.594) | 0.886          |
| ASD-EO               | vs DD       | TARC     | 1.059 (0.737 - 1.523) | 0.755          | 0.874 (0.586 - 1.304) | 0.511          |
| ASD-Reg              | vs DD       | TARC     | 1.388 (0.87 - 2.213)  | 0.169          | 1.178 (0.717 - 1.935) | 0.517          |
| ASD-YesID            | vs ASD-NoID | TARC     | 1.184 (0.813 - 1.725) | 0.378          | 1.231 (0.82 - 1.848)  | 0.315          |
| ASD-Reg              | vs ASD-EO   | TARC     | 1.31 (0.861 - 1.993)  | 0.208          | 1.347 (0.863 - 2.103) | 0.19           |
| ASD                  | vs GP       | TECK     | 1.541 (0.718 - 3.306) | 0.267          | 1.894 (0.726 - 4.942) | 0.192          |
| ASD-NoID             | vs GP       | TECK     | 2.568 (0.993 - 6.639) | 0.052          | 2.239 (0.673 - 7.445) | 0.188          |
| ASD-YesID            | vs GP       | TECK     | 0.918 (0.352 - 2.399) | 0.862          | 1.659 (0.48 - 5.739)  | 0.424          |
| ASD-EO               | vs GP       | TECK     | 1.512 (0.657 - 3.477) | 0.331          | 1.602 (0.562 - 4.564) | 0.377          |

|           |             | <b>Crude</b>         |                       | <b>Adjusted</b>    |                       |       |
|-----------|-------------|----------------------|-----------------------|--------------------|-----------------------|-------|
|           |             | <b>OR (95% CI)</b>   | <b>P-Value</b>        | <b>OR (95% CI)</b> | <b>P-Value</b>        |       |
|           |             | <b>Immune Marker</b> |                       |                    |                       |       |
| ASD-Reg   | vs GP       | TECK                 | 1.5 (0.444 - 5.064)   | 0.514              | 2.887 (0.59 - 14.12)  | 0.19  |
| DD        | vs GP       | TECK                 | 1.404 (0.5 - 3.944)   | 0.52               | 1.811 (0.517 - 6.341) | 0.353 |
| ASD       | vs DD       | TECK                 | 1.098 (0.388 - 3.106) | 0.86               | 1.046 (0.281 - 3.888) | 0.947 |
| ASD-NoID  | vs DD       | TECK                 | 1.829 (0.561 - 5.966) | 0.317              | 1.236 (0.276 - 5.546) | 0.782 |
| ASD-YesID | vs DD       | TECK                 | 0.654 (0.198 - 2.163) | 0.487              | 0.916 (0.199 - 4.217) | 0.91  |
| ASD-EO    | vs DD       | TECK                 | 1.077 (0.361 - 3.21)  | 0.894              | 0.885 (0.222 - 3.527) | 0.862 |
| ASD-Reg   | vs DD       | TECK                 | 1.069 (0.262 - 4.364) | 0.926              | 1.594 (0.26 - 9.774)  | 0.614 |
| ASD-YesID | vs ASD-NoID | TECK                 | 0.358 (0.116 - 1.102) | 0.073              | 0.741 (0.172 - 3.191) | 0.687 |
| ASD-Reg   | vs ASD-EO   | TECK                 | 0.992 (0.28 - 3.522)  | 0.99               | 1.802 (0.342 - 9.498) | 0.487 |
| ASD       | vs GP       | TNF-a Q4             | 1.092 (0.722 - 1.651) | 0.677              | 1.145 (0.745 - 1.761) | 0.538 |
|           |             | TNF-a Q3             | 1.022 (0.677 - 1.544) | 0.916              | 1.046 (0.681 - 1.608) | 0.837 |
|           |             | TNF-a Q2             | 0.872 (0.583 - 1.306) | 0.507              | 0.884 (0.582 - 1.341) | 0.561 |
|           |             | TNF-a Q1             | Reference             |                    | Reference             |       |
| ASD-NoID  | vs GP       | TNF-a Q4             | 1.251 (0.744 - 2.103) | 0.398              | 1.262 (0.736 - 2.165) | 0.397 |
|           |             | TNF-a Q3             | 1.273 (0.762 - 2.125) | 0.356              | 1.259 (0.736 - 2.151) | 0.4   |
|           |             | TNF-a Q2             | 0.967 (0.578 - 1.618) | 0.898              | 0.962 (0.565 - 1.637) | 0.885 |
|           |             | TNF-a Q1             | Reference             |                    | Reference             |       |
| ASD-YesID | vs GP       | TNF-a Q4             | 1.037 (0.61 - 1.763)  | 0.892              | 1.133 (0.653 - 1.966) | 0.657 |
|           |             | TNF-a Q3             | 0.943 (0.553 - 1.607) | 0.828              | 1.013 (0.582 - 1.764) | 0.962 |
|           |             | TNF-a Q2             | 0.963 (0.578 - 1.604) | 0.885              | 1.019 (0.602 - 1.725) | 0.944 |
|           |             | TNF-a Q1             | Reference             |                    | Reference             |       |
| ASD-EO    | vs GP       | TNF-a Q4             | 1.026 (0.658 - 1.6)   | 0.91               | 1.081 (0.679 - 1.72)  | 0.743 |
|           |             | TNF-a Q3             | 0.911 (0.583 - 1.425) | 0.684              | 0.939 (0.588 - 1.499) | 0.791 |
|           |             | TNF-a Q2             | 0.769 (0.496 - 1.194) | 0.242              | 0.771 (0.488 - 1.217) | 0.264 |
|           |             | TNF-a Q1             | Reference             |                    | Reference             |       |
| ASD-Reg   | vs GP       | TNF-a Q4             | 1.327 (0.65 - 2.711)  | 0.437              | 1.365 (0.653 - 2.852) | 0.408 |

|                      |          | <b>Crude</b>          |                | <b>Adjusted</b>       |                |
|----------------------|----------|-----------------------|----------------|-----------------------|----------------|
| <b>Immune Marker</b> |          | <b>OR (95% CI)</b>    | <b>P-Value</b> | <b>OR (95% CI)</b>    | <b>P-Value</b> |
|                      | TNF-a Q3 | 1.632 (0.824 - 3.234) | 0.16           | 1.608 (0.791 - 3.268) | 0.19           |
|                      | TNF-a Q2 | 1.429 (0.727 - 2.807) | 0.3            | 1.506 (0.753 - 3.01)  | 0.247          |
|                      | TNF-a Q1 | Reference             |                | Reference             |                |
| DD                   | vs GP    |                       |                |                       |                |
|                      | TNF-a Q4 | 1.127 (0.655 - 1.94)  | 0.666          | 1.164 (0.649 - 2.086) | 0.61           |
|                      | TNF-a Q3 | 0.857 (0.487 - 1.507) | 0.592          | 0.87 (0.476 - 1.589)  | 0.65           |
|                      | TNF-a Q2 | 0.817 (0.473 - 1.409) | 0.467          | 0.891 (0.497 - 1.597) | 0.698          |
|                      | TNF-a Q1 | Reference             |                | Reference             |                |
| ASD                  | vs DD    |                       |                |                       |                |
|                      | TNF-a Q4 | 0.969 (0.564 - 1.664) | 0.909          | 0.984 (0.545 - 1.774) | 0.956          |
|                      | TNF-a Q3 | 1.193 (0.679 - 2.098) | 0.54           | 1.203 (0.652 - 2.221) | 0.555          |
|                      | TNF-a Q2 | 1.068 (0.615 - 1.854) | 0.815          | 0.992 (0.546 - 1.803) | 0.979          |
|                      | TNF-a Q1 | Reference             |                | Reference             |                |
| ASD-NoID             | vs DD    |                       |                |                       |                |
|                      | TNF-a Q4 | 1.11 (0.594 - 2.074)  | 0.744          | 1.084 (0.552 - 2.129) | 0.814          |
|                      | TNF-a Q3 | 1.486 (0.782 - 2.822) | 0.227          | 1.447 (0.724 - 2.893) | 0.296          |
|                      | TNF-a Q2 | 1.184 (0.626 - 2.239) | 0.603          | 1.079 (0.545 - 2.138) | 0.826          |
|                      | TNF-a Q1 | Reference             |                | Reference             |                |
| ASD-YesID            | vs DD    |                       |                |                       |                |
|                      | TNF-a Q4 | 0.92 (0.488 - 1.736)  | 0.798          | 0.973 (0.493 - 1.923) | 0.938          |
|                      | TNF-a Q3 | 1.1 (0.57 - 2.125)    | 0.776          | 1.165 (0.576 - 2.357) | 0.67           |
|                      | TNF-a Q2 | 1.179 (0.626 - 2.223) | 0.61           | 1.144 (0.581 - 2.251) | 0.697          |
|                      | TNF-a Q1 | Reference             |                | Reference             |                |
| ASD-EO               | vs DD    |                       |                |                       |                |
|                      | TNF-a Q4 | 0.91 (0.518 - 1.601)  | 0.745          | 0.929 (0.501 - 1.722) | 0.814          |
|                      | TNF-a Q3 | 1.064 (0.589 - 1.919) | 0.838          | 1.079 (0.568 - 2.051) | 0.816          |
|                      | TNF-a Q2 | 0.942 (0.528 - 1.679) | 0.84           | 0.866 (0.462 - 1.62)  | 0.652          |
|                      | TNF-a Q1 | Reference             |                | Reference             |                |
| ASD-Reg              | vs DD    |                       |                |                       |                |
|                      | TNF-a Q4 | 1.178 (0.532 - 2.607) | 0.686          | 1.173 (0.508 - 2.705) | 0.709          |
|                      | TNF-a Q3 | 1.905 (0.869 - 4.177) | 0.107          | 1.849 (0.806 - 4.243) | 0.147          |
|                      | TNF-a Q2 | 1.75 (0.808 - 3.789)  | 0.156          | 1.69 (0.751 - 3.804)  | 0.205          |
|                      | TNF-a Q1 | Reference             |                | Reference             |                |



|                       |  |            | <i>Crude</i>          |                | <i>Adjusted</i>       |                |
|-----------------------|--|------------|-----------------------|----------------|-----------------------|----------------|
| <i>Immune Marker</i>  |  |            | <i>OR (95% CI)</i>    | <i>P-Value</i> | <i>OR (95% CI)</i>    | <i>P-Value</i> |
| ASD-YesID vs ASD-NoID |  | TNF-a Q4   | 0.829 (0.449 - 1.533) | 0.55           | 0.898 (0.475 - 1.695) | 0.739          |
|                       |  | TNF-a Q3   | 0.741 (0.401 - 1.369) | 0.338          | 0.805 (0.425 - 1.526) | 0.507          |
|                       |  | TNF-a Q2   | 0.996 (0.543 - 1.828) | 0.99           | 1.06 (0.567 - 1.979)  | 0.855          |
|                       |  | TNF-a Q1   | Reference             |                | Reference             |                |
| ASD-Reg vs ASD-EO     |  | TNF-a Q4   | 1.294 (0.623 - 2.686) | 0.49           | 1.263 (0.593 - 2.69)  | 0.545          |
|                       |  | TNF-a Q3   | 1.791 (0.885 - 3.626) | 0.105          | 1.713 (0.822 - 3.57)  | 0.151          |
|                       |  | TNF-a Q2   | 1.858 (0.921 - 3.746) | 0.084          | 1.953 (0.948 - 4.021) | 0.069          |
|                       |  | TNF-a Q1   | Reference             |                | Reference             |                |
| ASD vs GP             |  | TNF-a >10% | 0.92 (0.569 - 1.487)  | 0.733          | 0.946 (0.575 - 1.556) | 0.065          |
|                       |  | TNF-a ≤10% | Reference             |                | Reference             |                |
|                       |  | TNF-a ≤10% | Reference             |                | Reference             |                |
| ASD-NoID vs GP        |  | TNF-a >10% | 0.947 (0.522 - 1.719) | 0.859          | 0.926 (0.499 - 1.718) | 0.807          |
|                       |  | TNF-a ≤10% | Reference             |                | Reference             |                |
| ASD-YesID vs GP       |  | TNF-a >10% | 0.967 (0.52 - 1.797)  | 0.916          | 1.06 (0.559 - 2.007)  | 0.859          |
|                       |  | TNF-a ≤10% | Reference             |                | Reference             |                |
| ASD-EO vs GP          |  | TNF-a >10% | 0.906 (0.538 - 1.525) | 0.71           | 0.941 (0.548 - 1.617) | 0.827          |
|                       |  | TNF-a ≤10% | Reference             |                | Reference             |                |
| ASD-Reg vs GP         |  | TNF-a >10% | 0.971 (0.45 - 2.094)  | 0.94           | 1.007 (0.453 - 2.24)  | 0.986          |
|                       |  | TNF-a ≤10% | Reference             |                | Reference             |                |
| DD vs GP              |  | TNF-a >10% | 1.532 (0.718 - 3.269) | 0.859          | 2.158 (0.953 - 4.887) | 0.065          |
| ASD vs DD             |  | TNF-a >10% | 0.92 (0.569 - 1.487)  | 0.733          | 0.438 (0.193 - 0.997) | <b>0.049</b>   |
|                       |  | TNF-a ≤10% | Reference             |                | Reference             |                |
| ASD-NoID vs DD        |  | TNF-a >10% | 0.947 (0.522 - 1.719) | 0.859          | 0.429 (0.174 - 1.056) | 0.065          |
|                       |  | TNF-a ≤10% | Reference             |                | Reference             |                |
| ASD-YesID vs DD       |  | TNF-a >10% | 0.967 (0.52 - 1.797)  | 0.916          | 0.491 (0.197 - 1.223) | 0.127          |
|                       |  | TNF-a ≤10% | Reference             |                | Reference             |                |

|                      |             |            | <i>Crude</i>          |                | <i>Adjusted</i>       |                |
|----------------------|-------------|------------|-----------------------|----------------|-----------------------|----------------|
| <i>Immune Marker</i> |             |            | <i>OR (95% CI)</i>    | <i>P-Value</i> | <i>OR (95% CI)</i>    | <i>P-Value</i> |
| ASD-EO               | vs DD       | TNF-a >10% | 0.906 (0.538 - 1.525) | 0.71           | 0.436 (0.186 - 1.021) | 0.056          |
|                      |             | TNF-a ≤10% | Reference             |                | Reference             |                |
| ASD-Reg              | vs DD       | TNF-a >10% | 0.971 (0.45 - 2.094)  | 0.94           | 0.467 (0.167 - 1.304) | 0.146          |
|                      |             | TNF-a ≤10% | Reference             |                | Reference             |                |
| ASD-YesID            | vs ASD-NoID | TNF-a >10% | 1.021 (0.502 - 2.075) | 0.955          | 1.144 (0.551 - 2.378) | 0.718          |
|                      |             | TNF-a ≤10% | Reference             |                | Reference             |                |
| ASD-Reg              | vs ASD-EO   | TNF-a >10% | 1.071 (0.486 - 2.364) | 0.864          | 1.07 (0.469 - 2.44)   | 0.873          |
|                      |             | TNF-a ≤10% | Reference             |                | Reference             |                |
| ASD                  | vs GP       | TNF-a ≥90% | 1.087 (0.673 - 1.758) | 0.733          | 1.164 (0.69 - 1.963)  | 0.569          |
|                      |             | TNF-a <90% | Reference             |                | Reference             |                |
| ASD-NoID             | vs GP       | TNF-a ≥90% | 0.927 (0.5 - 1.719)   | 0.809          | 0.91 (0.464 - 1.788)  | 0.785          |
|                      |             | TNF-a <90% | Reference             |                | Reference             |                |
| ASD-YesID            | vs GP       | TNF-a ≥90% | 1.253 (0.696 - 2.259) | 0.452          | 1.479 (0.777 - 2.813) | 0.233          |
|                      |             | TNF-a <90% | Reference             |                | Reference             |                |
| ASD-EO               | vs GP       | TNF-a ≥90% | 0.973 (0.569 - 1.664) | 0.921          | 1.002 (0.557 - 1.803) | 0.994          |
|                      |             | TNF-a <90% | Reference             |                | Reference             |                |
| ASD-Reg              | vs GP       | TNF-a ≥90% | 1.29 (0.63 - 2.643)   | 0.486          | 1.517 (0.689 - 3.342) | 0.301          |
|                      |             | TNF-a <90% | Reference             |                | Reference             |                |
| DD                   | vs GP       | TNF-a ≥90% | 1.056 (0.551 - 2.022) | 0.871          | 1.309 (0.628 - 2.729) | 0.472          |
|                      |             | TNF-a <90% | Reference             |                | Reference             |                |
| ASD                  | vs DD       | TNF-a ≥90% | 1.03 (0.54 - 1.966)   | 0.928          | 0.889 (0.425 - 1.858) | 0.755          |
|                      |             | TNF-a <90% | Reference             |                | Reference             |                |
| ASD-NoID             | vs DD       | TNF-a ≥90% | 0.878 (0.413 - 1.866) | 0.735          | 0.695 (0.296 - 1.634) | 0.404          |
|                      |             | TNF-a <90% | Reference             |                | Reference             |                |
| ASD-YesID            | vs DD       | TNF-a ≥90% | 1.188 (0.572 - 2.466) | 0.645          | 1.129 (0.495 - 2.575) | 0.773          |
|                      |             | TNF-a <90% | Reference             |                | Reference             |                |

|                      |             |            | <i>Crude</i>          |                | <i>Adjusted</i>       |                |
|----------------------|-------------|------------|-----------------------|----------------|-----------------------|----------------|
| <i>Immune Marker</i> |             |            | <i>OR (95% CI)</i>    | <i>P-Value</i> | <i>OR (95% CI)</i>    | <i>P-Value</i> |
| ASD-EO               | vs DD       | TNF-a ≥90% | 0.922 (0.463 - 1.836) | 0.818          | 0.765 (0.348 - 1.683) | 0.506          |
|                      |             | TNF-a <90% | Reference             |                | Reference             |                |
| ASD-Reg              | vs DD       | TNF-a ≥90% | 1.222 (0.529 - 2.824) | 0.639          | 1.159 (0.454 - 2.956) | 0.758          |
|                      |             | TNF-a <90% | Reference             |                | Reference             |                |
| ASD-YesID            | vs ASD-NoID | TNF-a ≥90% | 1.352 (0.67 - 2.728)  | 0.399          | 1.624 (0.751 - 3.511) | 0.218          |
|                      |             | TNF-a <90% | Reference             |                | Reference             |                |
| ASD-Reg              | vs ASD-EO   | TNF-a ≥90% | 1.325 (0.625 - 2.813) | 0.463          | 1.514 (0.658 - 3.482) | 0.329          |
|                      |             | TNF-a <90% | Reference             |                | Reference             |                |
| ASD                  | vs GP       | IL-12p70   | 1.375 (0.871 - 2.171) | 0.171          | 1.646 (0.909 - 2.98)  | 0.1            |
| ASD-NoID             | vs GP       | IL-12p70   | 1.584 (0.884 - 2.84)  | 0.122          | 2.238 (1.054 - 4.75)  | <b>0.036</b>   |
| ASD-YesID            | vs GP       | IL-12p70   | 1.274 (0.709 - 2.289) | 0.418          | 1.354 (0.628 - 2.918) | 0.439          |
| ASD-EO               | vs GP       | IL-12p70   | 1.445 (0.873 - 2.394) | 0.152          | 1.801 (0.937 - 3.461) | 0.078          |
| ASD-Reg              | vs GP       | IL-12p70   | 1.204 (0.584 - 2.48)  | 0.615          | 1.445 (0.533 - 3.915) | 0.469          |
| DD                   | vs GP       | IL-12p70   | 0.684 (0.413 - 1.134) | 0.141          | 0.557 (0.292 - 1.061) | 0.075          |
| ASD                  | vs DD       | IL-12p70   | 2.011 (1.168 - 3.461) | <b>0.012</b>   | 2.956 (1.432 - 6.1)   | <b>0.003</b>   |
| ASD-NoID             | vs DD       | IL-12p70   | 2.317 (1.202 - 4.463) | <b>0.012</b>   | 4.019 (1.693 - 9.541) | <b>0.002</b>   |
| ASD-YesID            | vs DD       | IL-12p70   | 1.863 (0.969 - 3.581) | 0.062          | 2.432 (1.023 - 5.779) | <b>0.044</b>   |
| ASD-EO               | vs DD       | IL-12p70   | 2.113 (1.178 - 3.793) | <b>0.012</b>   | 3.234 (1.486 - 7.042) | <b>0.003</b>   |
| ASD-Reg              | vs DD       | IL-12p70   | 1.76 (0.809 - 3.829)  | 0.154          | 2.595 (0.887 - 7.597) | 0.082          |
| ASD-YesID            | vs ASD-NoID | IL-12p70   | 0.804 (0.398 - 1.623) | 0.543          | 0.605 (0.241 - 1.52)  | 0.285          |
| ASD-Reg              | vs ASD-EO   | IL-12p70   | 0.833 (0.387 - 1.793) | 0.64           | 0.802 (0.279 - 2.305) | 0.683          |
| ASD                  | vs GP       | IL-13 Q4   | 1.111 (0.742 - 1.664) | 0.609          | 1.098 (0.721 - 1.67)  | 0.664          |
|                      |             | IL-13 Q3   | 1.027 (0.68 - 1.55)   | 0.9            | 0.997 (0.651 - 1.527) | 0.989          |
|                      |             | IL-13 Q2   | 1.439 (0.952 - 2.175) | 0.085          | 1.404 (0.916 - 2.15)  | 0.119          |

|                      |          | <i>Crude</i>          |                | <i>Adjusted</i>       |                |
|----------------------|----------|-----------------------|----------------|-----------------------|----------------|
| <i>Immune Marker</i> |          | <i>OR (95% CI)</i>    | <i>P-Value</i> | <i>OR (95% CI)</i>    | <i>P-Value</i> |
| ASD-NoID vs GP       | IL-13 Q1 | Reference             |                | Reference             |                |
|                      | IL-13 Q4 | 1.398 (0.839 - 2.331) | 0.199          | 1.393 (0.819 - 2.369) | 0.222          |
|                      | IL-13 Q3 | 1.176 (0.692 - 1.996) | 0.55           | 1.134 (0.656 - 1.96)  | 0.654          |
|                      | IL-13 Q2 | 1.706 (1.013 - 2.874) | <b>0.045</b>   | 1.612 (0.942 - 2.76)  | 0.082          |
| ASD-YesID vs GP      | IL-13 Q1 | Reference             |                | Reference             |                |
|                      | IL-13 Q4 | 0.852 (0.506 - 1.432) | 0.545          | 0.811 (0.473 - 1.389) | 0.446          |
|                      | IL-13 Q3 | 0.886 (0.526 - 1.493) | 0.65           | 0.867 (0.506 - 1.486) | 0.603          |
|                      | IL-13 Q2 | 1.254 (0.751 - 2.096) | 0.387          | 1.259 (0.742 - 2.137) | 0.393          |
| ASD-EO vs GP         | IL-13 Q1 | Reference             |                | Reference             |                |
|                      | IL-13 Q4 | 1.139 (0.728 - 1.783) | 0.568          | 1.126 (0.706 - 1.796) | 0.618          |
|                      | IL-13 Q3 | 1.151 (0.733 - 1.809) | 0.541          | 1.128 (0.707 - 1.801) | 0.613          |
|                      | IL-13 Q2 | 1.561 (0.993 - 2.454) | 0.054          | 1.493 (0.935 - 2.384) | 0.093          |
| ASD-Reg vs GP        | IL-13 Q1 | Reference             |                | Reference             |                |
|                      | IL-13 Q4 | 0.941 (0.501 - 1.768) | 0.851          | 0.947 (0.492 - 1.824) | 0.871          |
|                      | IL-13 Q3 | 0.776 (0.399 - 1.507) | 0.453          | 0.73 (0.367 - 1.453)  | 0.371          |
|                      | IL-13 Q2 | 1.22 (0.648 - 2.296)  | 0.539          | 1.199 (0.625 - 2.301) | 0.585          |
| ASD vs DD            | IL-13 Q1 | Reference             |                | Reference             |                |
|                      | IL-13 Q4 | 1.25 (0.72 - 2.172)   | 0.428          | 1.655 (0.9 - 3.043)   | 0.105          |
|                      | IL-13 Q3 | 1.048 (0.604 - 1.819) | 0.867          | 1.106 (0.607 - 2.013) | 0.742          |
|                      | IL-13 Q2 | 1.301 (0.75 - 2.258)  | 0.349          | 1.475 (0.806 - 2.698) | 0.207          |
| ASD-NoID vs DD       | IL-13 Q1 | Reference             |                | Reference             |                |
|                      | IL-13 Q4 | 1.573 (0.834 - 2.969) | 0.162          | 2.099 (1.051 - 4.193) | <b>0.036</b>   |
|                      | IL-13 Q3 | 1.2 (0.63 - 2.285)    | 0.579          | 1.257 (0.629 - 2.512) | 0.517          |
|                      | IL-13 Q2 | 1.543 (0.817 - 2.915) | 0.182          | 1.694 (0.851 - 3.371) | 0.134          |
| ASD-YesID vs DD      | IL-13 Q1 | Reference             |                | Reference             |                |
|                      | IL-13 Q4 | 0.958 (0.504 - 1.821) | 0.896          | 1.222 (0.611 - 2.448) | 0.571          |
|                      | IL-13 Q3 | 0.905 (0.478 - 1.711) | 0.758          | 0.961 (0.486 - 1.901) | 0.91           |
|                      | IL-13 Q2 | 1.134 (0.604 - 2.129) | 0.695          | 1.323 (0.672 - 2.607) | 0.418          |
|                      | IL-13 Q1 | Reference             |                | Reference             |                |

|           |             | <i>Crude</i>         |                       |                | <i>Adjusted</i>       |                |
|-----------|-------------|----------------------|-----------------------|----------------|-----------------------|----------------|
|           |             | <i>Immune Marker</i> | <i>OR (95% CI)</i>    | <i>P-Value</i> | <i>OR (95% CI)</i>    | <i>P-Value</i> |
| ASD-EO    | vs DD       | IL-13 Q4             | 1.282 (0.714 - 2.302) | 0.406          | 1.698 (0.891 - 3.234) | 0.107          |
|           |             | IL-13 Q3             | 1.175 (0.657 - 2.103) | 0.586          | 1.251 (0.665 - 2.353) | 0.487          |
|           |             | IL-13 Q2             | 1.412 (0.79 - 2.524)  | 0.245          | 1.569 (0.831 - 2.962) | 0.165          |
|           |             | IL-13 Q1             | Reference             |                | Reference             |                |
| ASD-Reg   | vs DD       | IL-13 Q4             | 1.059 (0.508 - 2.208) | 0.879          | 1.428 (0.65 - 3.135)  | 0.375          |
|           |             | IL-13 Q3             | 0.792 (0.371 - 1.691) | 0.546          | 0.81 (0.363 - 1.809)  | 0.607          |
|           |             | IL-13 Q2             | 1.103 (0.531 - 2.289) | 0.793          | 1.26 (0.579 - 2.741)  | 0.56           |
|           |             | IL-13 Q1             | Reference             |                | Reference             |                |
| DD        | vs GP       | IL-13 Q4             | 0.889 (0.515 - 1.533) | 0.672          | 0.663 (0.366 - 1.201) | 0.176          |
|           |             | IL-13 Q3             | 0.98 (0.57 - 1.683)   | 0.94           | 0.902 (0.505 - 1.611) | 0.727          |
|           |             | IL-13 Q2             | 1.106 (0.636 - 1.923) | 0.722          | 0.952 (0.524 - 1.729) | 0.871          |
|           |             | IL-13 Q1             | Reference             |                | Reference             |                |
| ASD-YesID | vs ASD-NoID | IL-13 Q4             | 0.609 (0.33 - 1.125)  | 0.113          | 0.582 (0.309 - 1.097) | 0.094          |
|           |             | IL-13 Q3             | 0.754 (0.403 - 1.412) | 0.378          | 0.765 (0.401 - 1.459) | 0.416          |
|           |             | IL-13 Q2             | 0.735 (0.403 - 1.342) | 0.316          | 0.781 (0.421 - 1.449) | 0.434          |
|           |             | IL-13 Q1             | Reference             |                | Reference             |                |
| ASD-Reg   | vs ASD-EO   | IL-13 Q4             | 0.826 (0.425 - 1.607) | 0.574          | 0.841 (0.421 - 1.681) | 0.624          |
|           |             | IL-13 Q3             | 0.674 (0.335 - 1.353) | 0.267          | 0.647 (0.314 - 1.334) | 0.238          |
|           |             | IL-13 Q2             | 0.781 (0.405 - 1.507) | 0.461          | 0.803 (0.407 - 1.583) | 0.526          |
|           |             | IL-13 Q1             | Reference             |                | Reference             |                |
| ASD       | vs GP       | IL-13 >10%           | 1.325 (0.793 - 2.214) | 0.282          | 1.312 (0.772 - 2.231) | 0.399          |
|           |             | IL-13 ≤10%           | Reference             |                | Reference             |                |
| ASD-NoID  | vs GP       | IL-13 >10%           | 1.394 (0.722 - 2.693) | 0.323          | 1.361 (0.69 - 2.684)  | 0.374          |
|           |             | IL-13 ≤10%           | Reference             |                | Reference             |                |
| ASD-YesID | vs GP       | IL-13 >10%           | 1.252 (0.647 - 2.423) | 0.505          | 1.233 (0.625 - 2.431) | 0.546          |

|           |             | <b>Crude</b>         |                       | <b>Adjusted</b>    |                       |       |
|-----------|-------------|----------------------|-----------------------|--------------------|-----------------------|-------|
|           |             | <b>OR (95% CI)</b>   | <b>P-Value</b>        | <b>OR (95% CI)</b> | <b>P-Value</b>        |       |
|           |             | <b>Immune Marker</b> |                       |                    |                       |       |
| ASD-EO    | vs GP       | IL-13 ≤10%           | Reference             |                    | Reference             |       |
|           |             | IL-13 >10%           | 1.281 (0.732 - 2.243) | 0.385              | 1.275 (0.714 - 2.278) | 0.412 |
| ASD-Reg   | vs GP       | IL-13 ≤10%           | Reference             |                    | Reference             |       |
|           |             | IL-13 >10%           | 1.139 (0.512 - 2.537) | 0.75               | 1.081 (0.475 - 2.461) | 0.853 |
| DD        | vs GP       | IL-13 ≤10%           | Reference             |                    | Reference             |       |
|           |             | IL-13 >10%           | 0.785 (0.426 - 1.445) | 0.323              | 0.753 (0.39 - 1.455)  | 0.399 |
| ASD       | vs DD       | IL-13 ≤10%           | Reference             |                    | Reference             |       |
| ASD-NoID  | vs DD       | IL-13 >10%           | 1.688 (0.893 - 3.192) | 0.107              | 1.743 (0.87 - 3.492)  | 0.117 |
|           |             | IL-13 ≤10%           | Reference             |                    | Reference             |       |
| ASD-YesID | vs DD       | IL-13 >10%           | 1.775 (0.831 - 3.792) | 0.138              | 1.807 (0.8 - 4.083)   | 0.155 |
|           |             | IL-13 ≤10%           | Reference             |                    | Reference             |       |
| ASD-EO    | vs DD       | IL-13 >10%           | 1.595 (0.745 - 3.412) | 0.229              | 1.637 (0.727 - 3.687) | 0.234 |
|           |             | IL-13 ≤10%           | Reference             |                    | Reference             |       |
| ASD-Reg   | vs DD       | IL-13 >10%           | 1.632 (0.831 - 3.206) | 0.155              | 1.693 (0.81 - 3.537)  | 0.161 |
|           |             | IL-13 ≤10%           | Reference             |                    | Reference             |       |
| ASD-YesID | vs ASD-NoID | IL-13 >10%           | 1.451 (0.599 - 3.516) | 0.409              | 1.436 (0.565 - 3.645) | 0.447 |
|           |             | IL-13 ≤10%           | Reference             |                    | Reference             |       |
| ASD-Reg   | vs ASD-EO   | IL-13 >10%           | 0.898 (0.404 - 1.998) | 0.792              | 0.906 (0.4 - 2.051)   | 0.813 |
|           |             | IL-13 ≤10%           | Reference             |                    | Reference             |       |
| ASD       | vs GP       | IL-13 >10%           | 0.889 (0.38 - 2.082)  | 0.787              | 0.848 (0.354 - 2.032) | 0.711 |
|           |             | IL-13 ≤10%           | Reference             |                    | Reference             |       |
| ASD-NoID  | vs GP       | IL-13 ≥90%           | 1.115 (0.699 - 1.778) | 0.647              | 1.373 (0.706 - 2.668) | 0.35  |
|           |             | IL-13 <90%           | Reference             |                    | Reference             |       |
| ASD-NoID  | vs GP       | IL-13 ≥90%           | 1.246 (0.713 - 2.177) | 0.44               | 1.625 (0.742 - 3.56)  | 0.225 |
|           |             | IL-13 <90%           | Reference             |                    | Reference             |       |

|                       |  |            | <i>Crude</i>          |                | <i>Adjusted</i>       |                |
|-----------------------|--|------------|-----------------------|----------------|-----------------------|----------------|
| <i>Immune Marker</i>  |  |            | <i>OR (95% CI)</i>    | <i>P-Value</i> | <i>OR (95% CI)</i>    | <i>P-Value</i> |
| ASD-YesID vs GP       |  | IL-13 ≥90% | 1.042 (0.57 - 1.906)  | 0.894          | 1.372 (0.576 - 3.268) | 0.475          |
|                       |  | IL-13 <90% | Reference             |                | Reference             |                |
| ASD-EO vs GP          |  | IL-13 ≥90% | 1.208 (0.734 - 1.989) | 0.457          | 1.58 (0.782 - 3.195)  | 0.203          |
|                       |  | IL-13 <90% | Reference             |                | Reference             |                |
| ASD-Reg vs GP         |  | IL-13 ≥90% | 0.852 (0.383 - 1.894) | 0.695          | 0.827 (0.247 - 2.772) | 0.759          |
|                       |  | IL-13 <90% | Reference             |                | Reference             |                |
| DD vs GP              |  | IL-13 ≥90% | 0.839 (0.425 - 1.656) | 0.612          | 0.836 (0.307 - 2.277) | 0.726          |
|                       |  | IL-13 <90% | Reference             |                | Reference             |                |
| ASD vs DD             |  | IL-13 ≥90% | 1.329 (0.677 - 2.611) | 0.408          | 1.642 (0.603 - 4.468) | 0.332          |
|                       |  | IL-13 <90% | Reference             |                | Reference             |                |
| ASD-NoID vs DD        |  | IL-13 ≥90% | 1.485 (0.708 - 3.116) | 0.295          | 1.944 (0.658 - 5.743) | 0.229          |
|                       |  | IL-13 <90% | Reference             |                | Reference             |                |
| ASD-YesID vs DD       |  | IL-13 ≥90% | 1.242 (0.572 - 2.699) | 0.584          | 1.642 (0.522 - 5.162) | 0.396          |
|                       |  | IL-13 <90% | Reference             |                | Reference             |                |
| ASD-EO vs DD          |  | IL-13 ≥90% | 1.44 (0.717 - 2.893)  | 0.305          | 1.89 (0.673 - 5.311)  | 0.227          |
|                       |  | IL-13 <90% | Reference             |                | Reference             |                |
| ASD-Reg vs DD         |  | IL-13 ≥90% | 1.016 (0.398 - 2.59)  | 0.974          | 0.99 (0.242 - 4.047)  | 0.988          |
|                       |  | IL-13 <90% | Reference             |                | Reference             |                |
| ASD-YesID vs ASD-NoID |  | IL-13 ≥90% | 0.836 (0.427 - 1.637) | 0.602          | 0.844 (0.327 - 2.183) | 0.727          |
|                       |  | IL-13 <90% | Reference             |                | Reference             |                |
| ASD-Reg vs ASD-EO     |  | IL-13 ≥90% | 0.705 (0.313 - 1.592) | 0.401          | 0.524 (0.154 - 1.783) | 0.301          |
|                       |  | IL-13 <90% | Reference             |                | Reference             |                |

Logistic regression models were adjusted for birth type (c-section vs vaginal), gender, gestational age, birth weight, age at blood draw, maternal and paternal age, maternal and paternal education, birth season, maternal birth place, child's birth year, maternal and paternal race, and plate number. Significant differences are highlighted in red. First Quartile, Q1 (Reference); Second Quartile, Q2; Third Quartile, Q3; Fourth Quartile, Q4.
